# Supplementary material
Source: PubMed Central journal article supplement (PMC6138527)
Supplement: NIHMS981482-supplement-Revisions.pdf [file NIHMS981482-supplement-Revisions.pdf]

# **Structure–Activity Relationships (SARs) of the Competence Stimulating Peptide (CSP) in *Streptococcus mutans* Reveal Motifs Critical for Membrane Protease SepM Recognition and ComD Receptor Activation**

Chowdhury Raihan Bikash, Sally R. Hamry, and Yftah Tal-Gan\*

*Department of Chemistry, University of Nevada, Reno, 1664 North Virginia Street, Reno,  
NV 89557*

## **Supporting Information.**

|                                                                                       |             |
|---------------------------------------------------------------------------------------|-------------|
| <b>Additional experimental details .....</b>                                          | <b>S-2</b>  |
| <b>HPLC traces for CSP analogs .....</b>                                              | <b>S-4</b>  |
| <b>Primary reporter gene assay data .....</b>                                         | <b>S-30</b> |
| <b>Agonism dose response curves .....</b>                                             | <b>S-36</b> |
| <b>Complete tables of EC<sub>50</sub> values for CSP analogs (SMCOM2) .....</b>       | <b>S-56</b> |
| <b>Comparison of results found from both reporter strains SAB249 and SMCOM2 .....</b> | <b>S-58</b> |
| <b>References .....</b>                                                               | <b>S-74</b> |

---

\* To whom correspondence should be addressed. [ytalgan@unr.edu](mailto:ytalgan@unr.edu)

## Additional experimental details

**Resin loading.** 0.1 g of Wang resin (0.94 mmol/g) was placed in a clean, dry round bottom flask with a minimal amount of dimethylformamide (DMF) to fully cover the resin, and the resin was allowed to swell at room temperature for 30 min. 0.94 mmol (10 equiv. relative to the overall loading of the resin) of Fmoc-protected amino acid were dissolved in dry dichloromethane (DCM) and placed on an ice bath. A few drops of DMF were added to aid complete dissolution when the amino acid had low solubility in DCM. A solution of 0.47 mmol (5 equiv. relative to the overall loading of the resin) diisopropylcarbodiimide (DIC) in dry DCM was then added dropwise to the amino acid solution. The mixture was stirred for 20 min on an ice bath and the DCM was removed from the mixture using a rotary evaporator. The residue was then dissolved with a minimal amount of DMF and the solution was added to the resin. 0.0094 mmol (0.1 equiv. relative to the overall loading of the resin) of dimethylaminopyridine (DMAP) were dissolved in DMF and the solution was added to the reaction mixture. The mixture was sealed and allowed to stand at room temperature for 2 h with occasional swirling. The resin was washed with DCM, then diethyl ether, followed by overnight drying under vacuum.

**Loading test.** Two small samples of the amino acid-loaded resin (approximately 5 mg each) were weighed and mixed with 3 mL of fresh 20% piperidine in DMF solution. This solution was stirred on a shaker for 2 h. The absorbance (290 nm) of the supernatants of the two piperidine-resin mixtures was measured by using a UV-Vis spectrophotometer to estimate the level of Fmoc removal, which correlates to first residue attachment. The first residue attachment was estimated from the following equations:

$$\text{Equation 1} \quad A \text{ (mmol/g)} = B \times 1000 / [1000 + (B \times (M - X))]$$

A is the theoretical substitution (mmol/g), B is the substitution of starting resin (mmol/g), and M is the molecular weight of target peptide with all protecting groups. X is 18 for hydroxymethyl-based resin.

$$\text{Equation 2} \quad B \text{ (mmol/g)} = (Abs_{\text{sample}} \times N) / (\text{mg of sample} \times 1.75)$$

B is the experimental first residue attachment and the equation is based on  $\epsilon = 5253 \text{ M}^{-1} \text{ cm}^{-1}$ . N is the fold of dilution of the supernatant.  $\frac{B}{A} \times 100\%$  is the percent yield of the loading. If the average of the percent yield of the two samples was greater than 70%, resin loading was deemed successful and the resin would be used for the synthesis of CSP analogs.

**Synthesis.** The resin (0.1 g) was first swelled by suspension in DCM for 30 min at room temperature and then drained. The resin was then washed with DMF (3 × 2 mL). To remove the Fmoc-protecting group, the resin was treated with piperidine (2 mL of 20% piperidine in DMF, 2 × 7 min) and washed with DMF (3 × 2 mL). To couple each amino acid, Fmoc-protected amino acids (2 equiv. relative to the overall loading of the resin) were dissolved in DMF (2 mL) and mixed with 2-(1H-benzotriazol-1-yl)-1,1,3,3-tetramethyluronium hexafluorophosphate (HBTU; 2 equiv.) and diisopropylethylamine (DIPEA; 2 equiv.). The solution was allowed to pre-activate for 1 min prior to being added to the resin and agitated for 1 h at room temperature. After each coupling step, the resin was drained and washed with DMF (2 × 2 mL). This process was repeated until the desired peptide sequence was obtained. CSP and analogs were synthesized either manually or with the AAPPTec Focus-XC peptide synthesizer.

**Cleavage.** Upon completion of peptide synthesis, the resin was washed with diethyl ether (2 mL) and dried under nitrogen stream for 3 min before it was transferred into a 15 mL falcon tube. The peptide was cleaved from the resin, along with all of the protecting groups, by mixing the resin with 3 mL cleavage cocktail of

95% trifluoroacetic acid (TFA), 2.5% triisopropylsilane (TIPS), and 2.5% 18 MΩ water for 3 h with agitation. The resulting cleavage product solution was separated from the resin by filtration and the filtrate was transferred into a new 50 mL falcon tube. A cooled solution of diethyl ether:hexane (1:1, 45 mL, 0 °C) was added to the filtrate, and the peptide was allowed to precipitate for 10 min in a freezer at -20 °C. The mixture was centrifuged for 5 min at 3000 RPM and the supernatant was removed to yield crude peptide that was dissolved in 10 mL acetonitrile (ACN):water (1:1) and lyophilized before HPLC purification.

## HPLC traces for CSP analogs

### 21-CSP

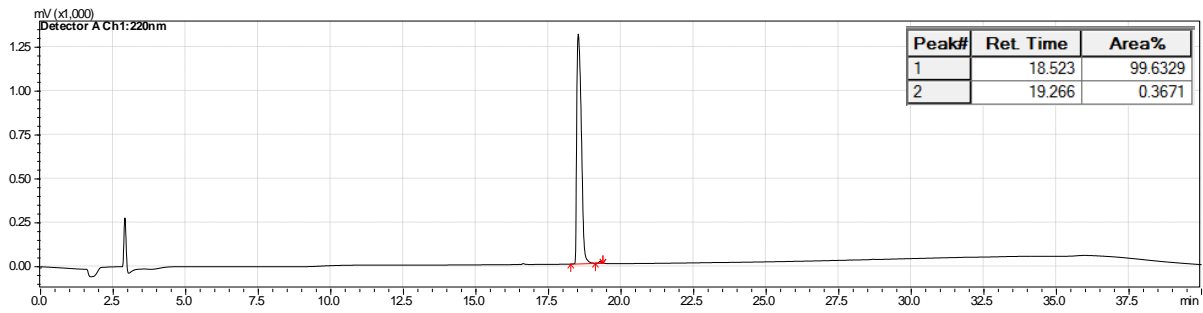

### 21-CSP-S1A

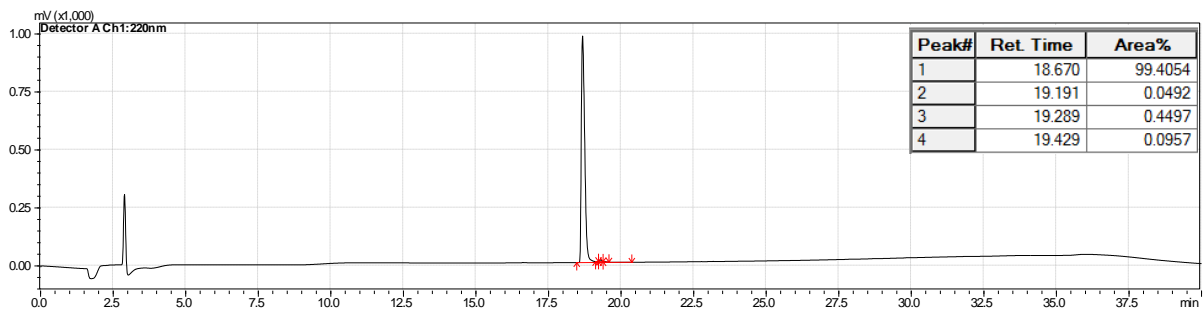

### 21-CSP-G2A

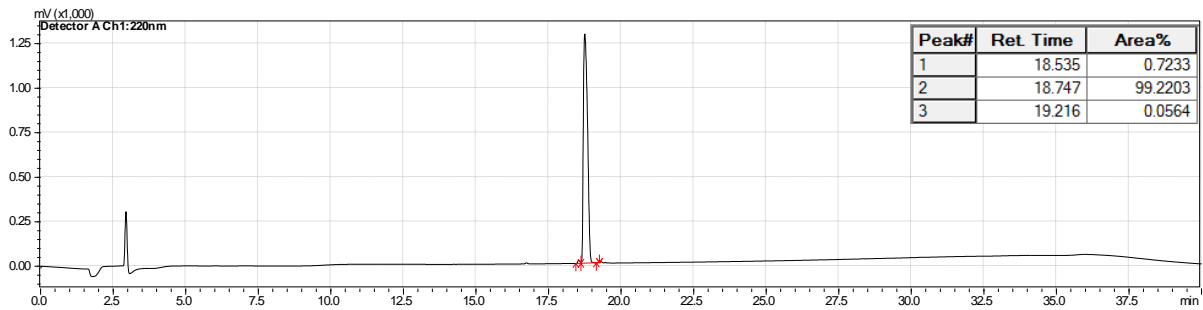

### 21-CSP-S3A

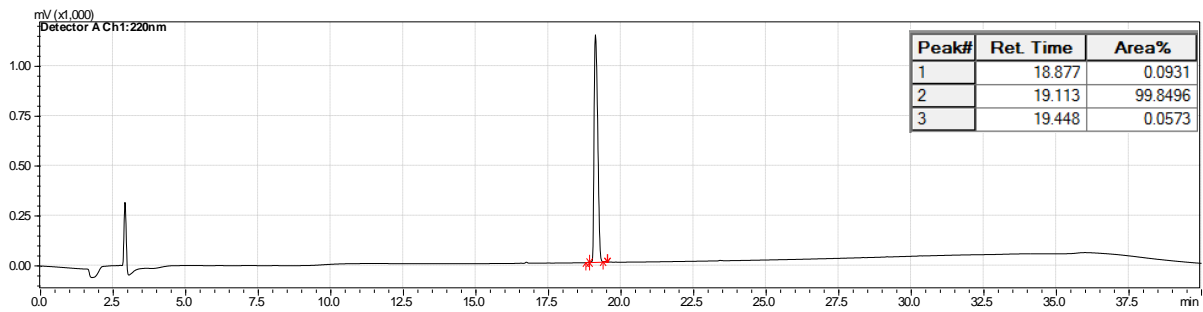

### 21-CSP-L4A

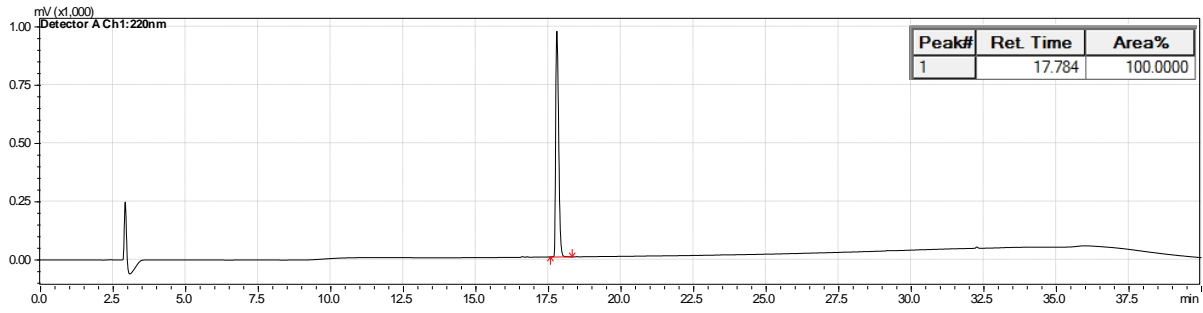

### 21-CSP-S5A

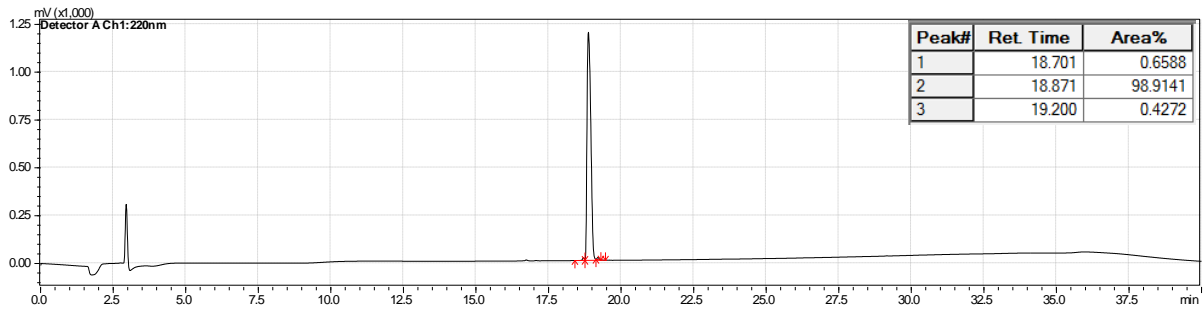

### 21-CSP-T6A

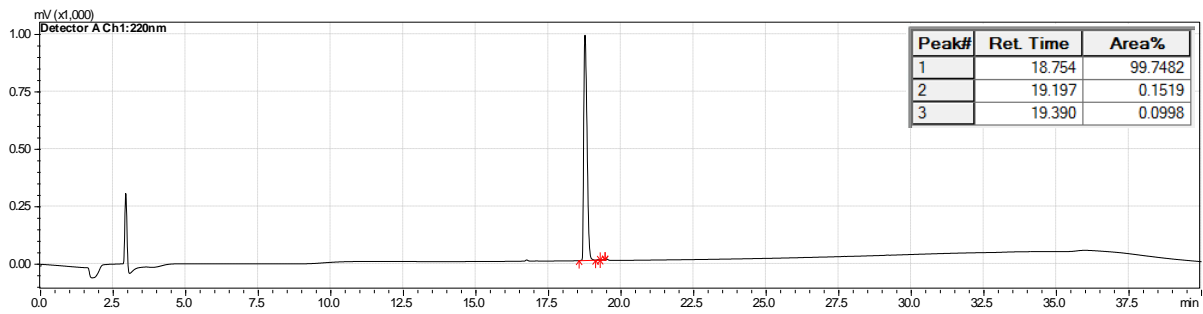

### 21-CSP-F7A

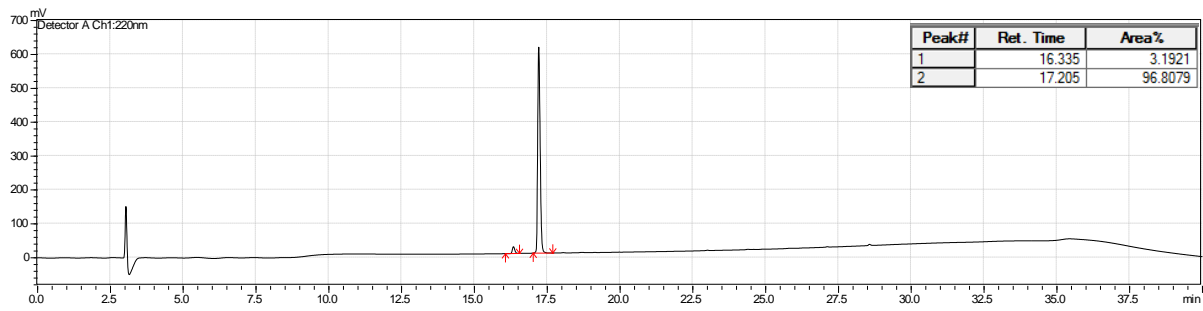

### 21-CSP-F8A

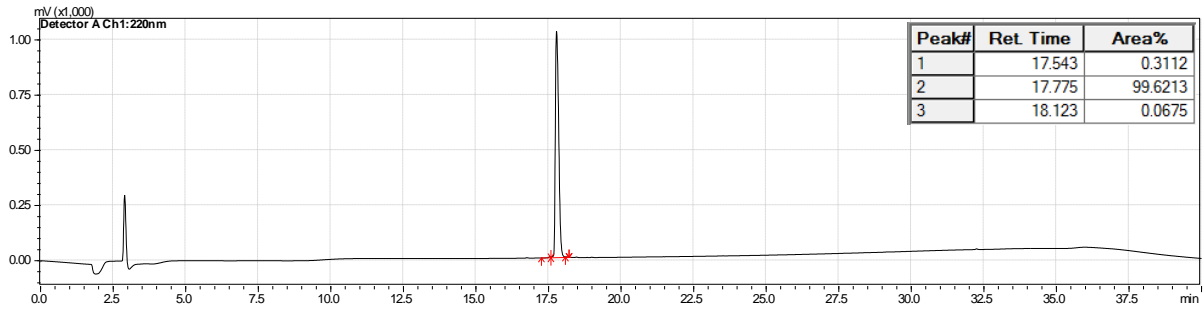

### 21-CSP-R9A

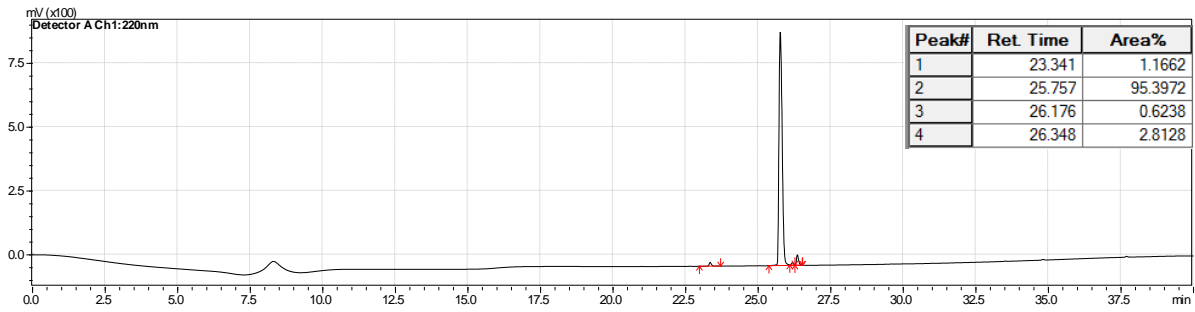

### 21-CSP-L10A

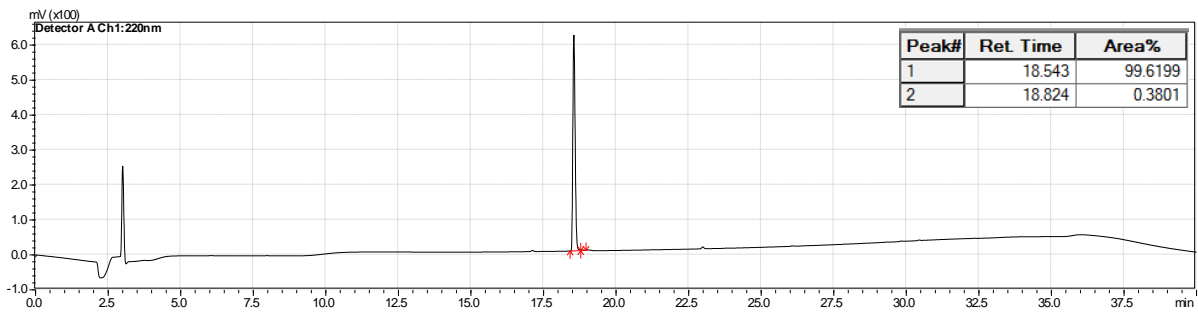

### 21-CSP-F11A

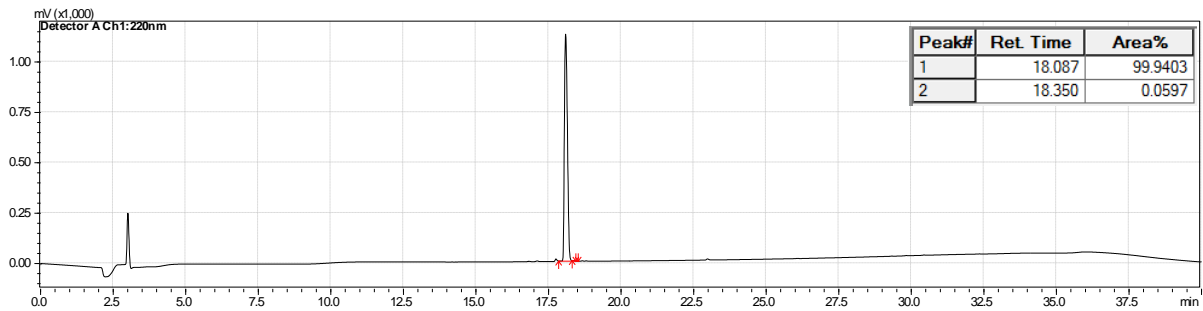

21-CSP-N12A

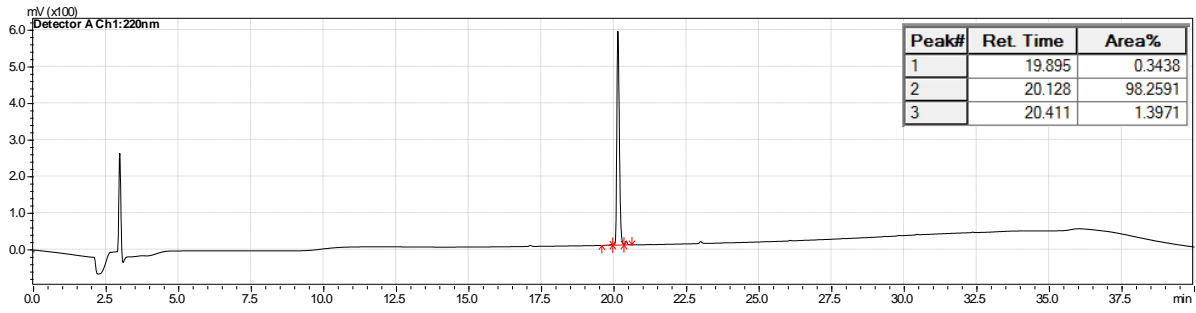

21-CSP-R13A

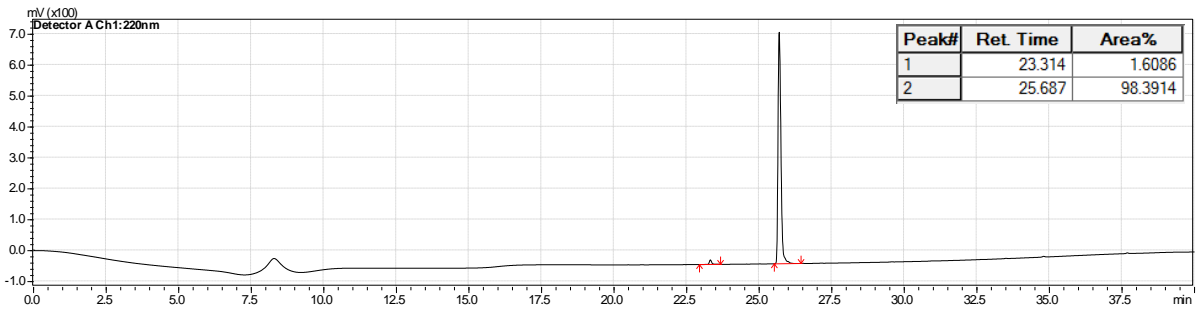

21-CSP-S14A

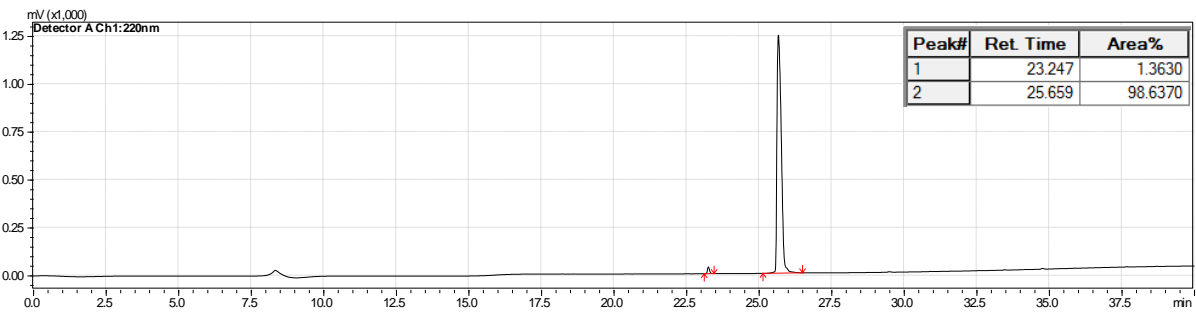

21-CSP-F15A

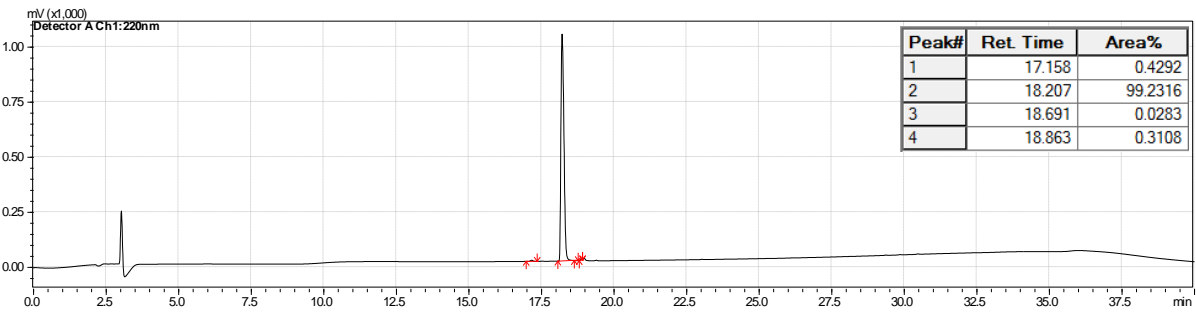

21-CSP-T16A

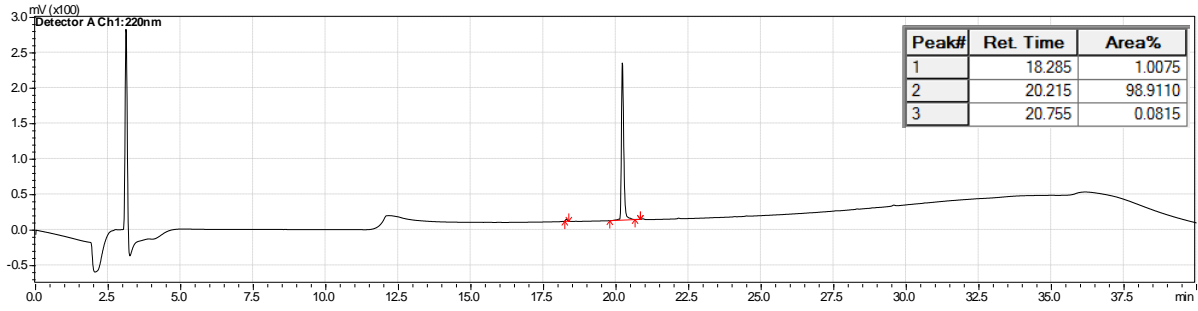

21-CSP-Q17A

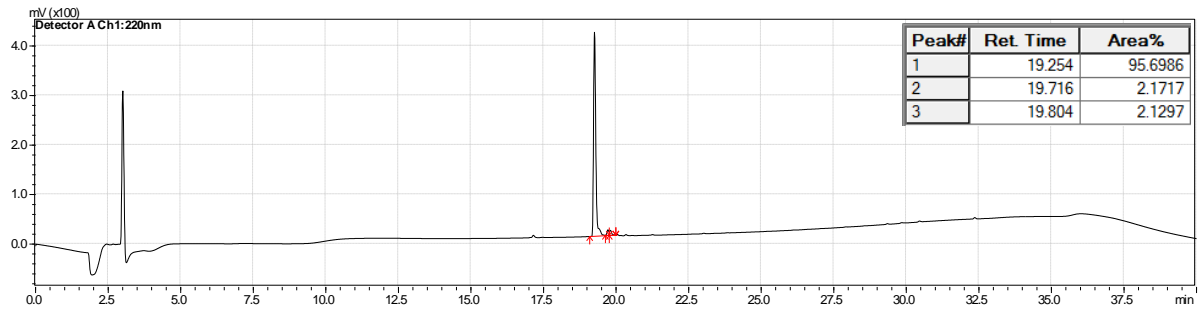

21-CSP-L19A

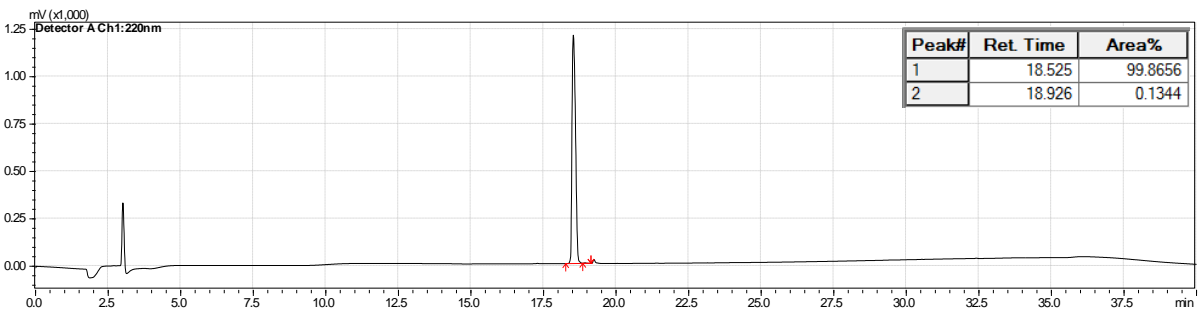

21-CSP-G20A

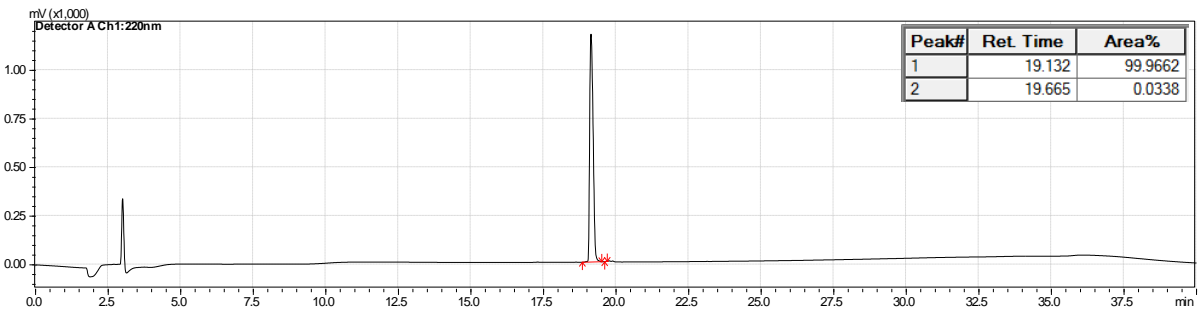



21-CSP-K21A

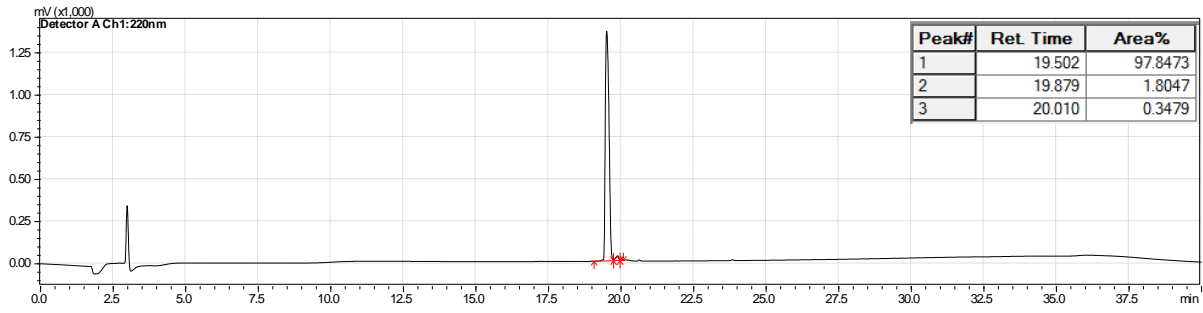

21-CSP-s1

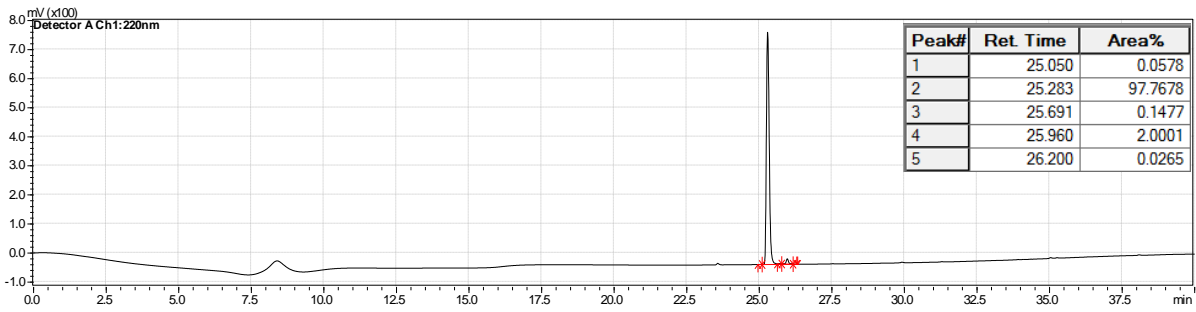

21-CSP-s3

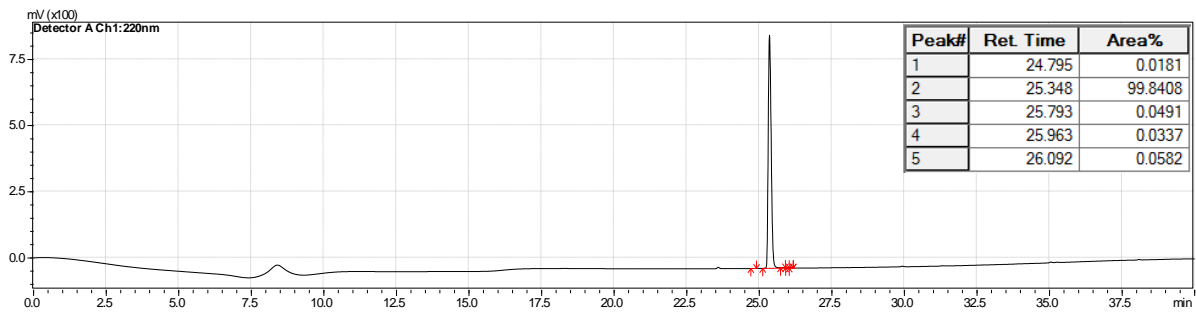

21-CSP-14

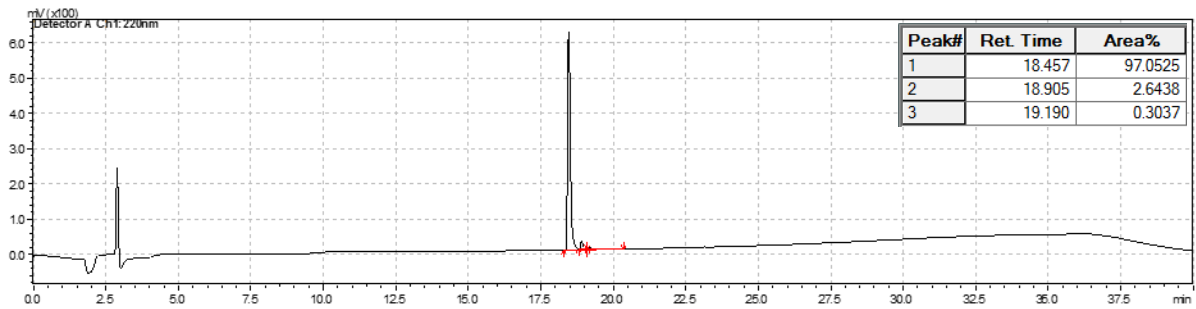

21-CSP-s5

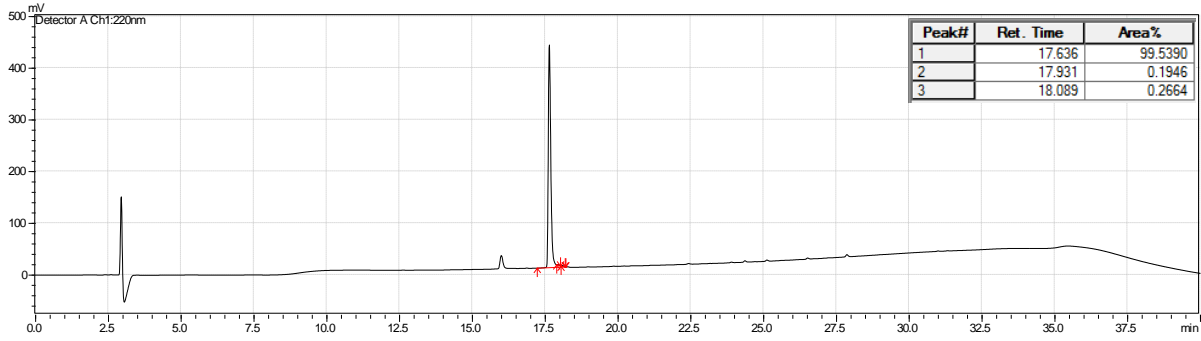

21-CSP-t6

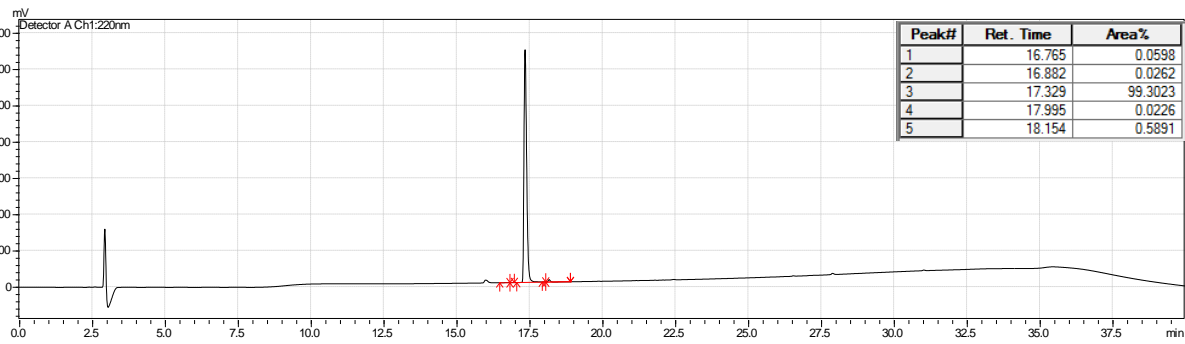

21-CSP-f7

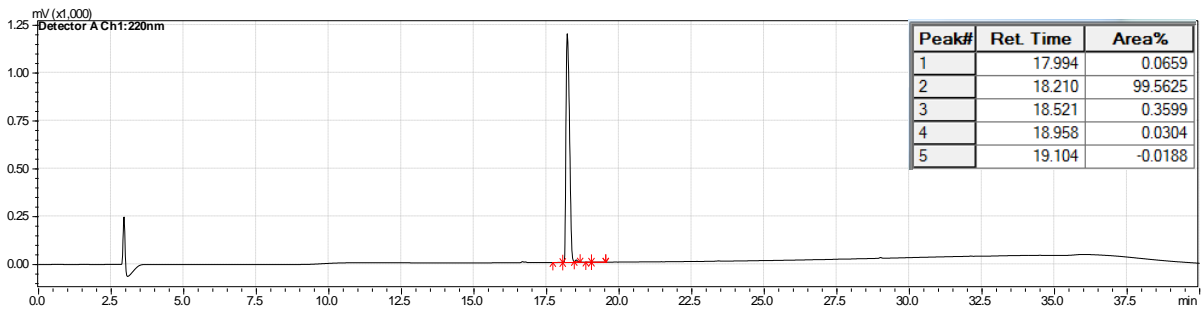

21-CSP-f8

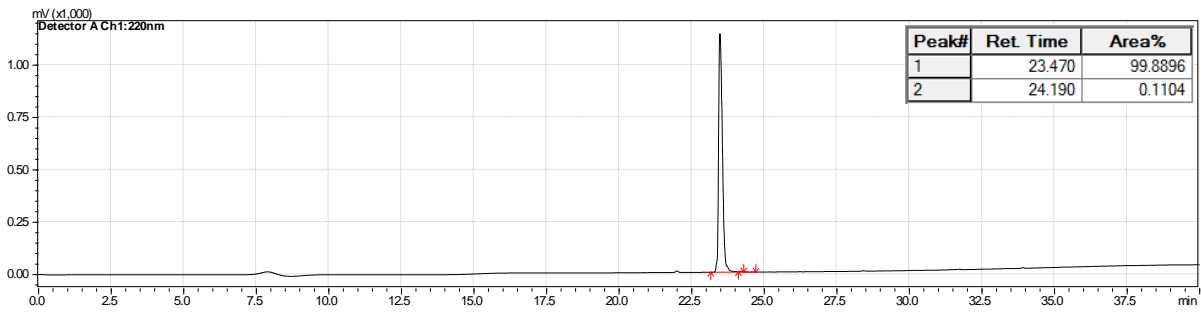

21-CSP-r9

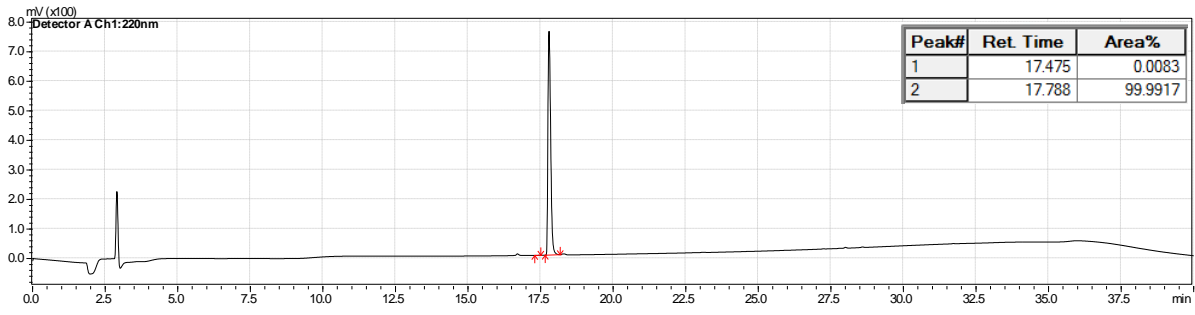

21-CSP-110

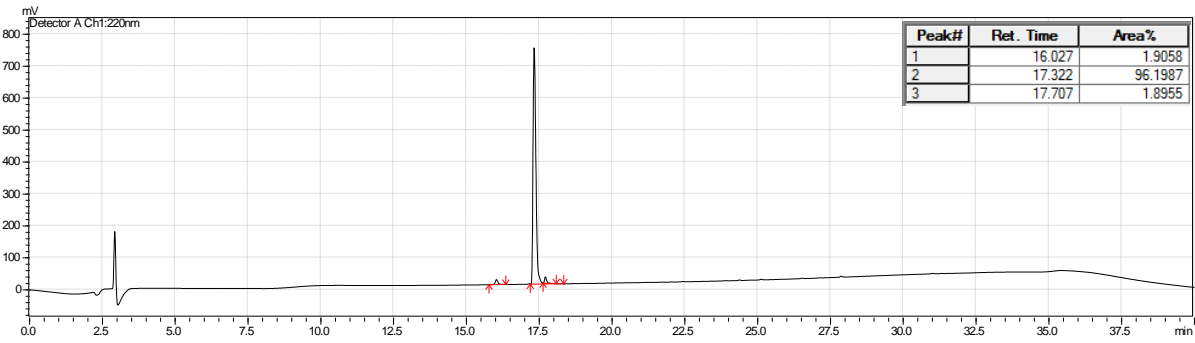

21-CSP-f11

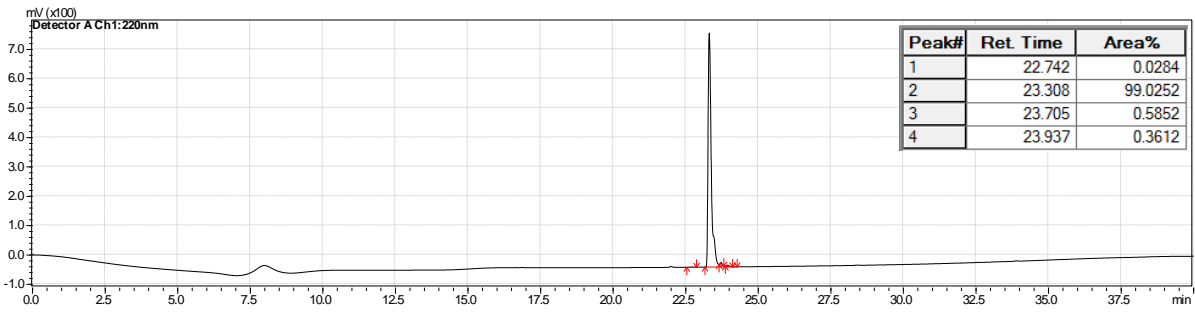

21-CSP-n12

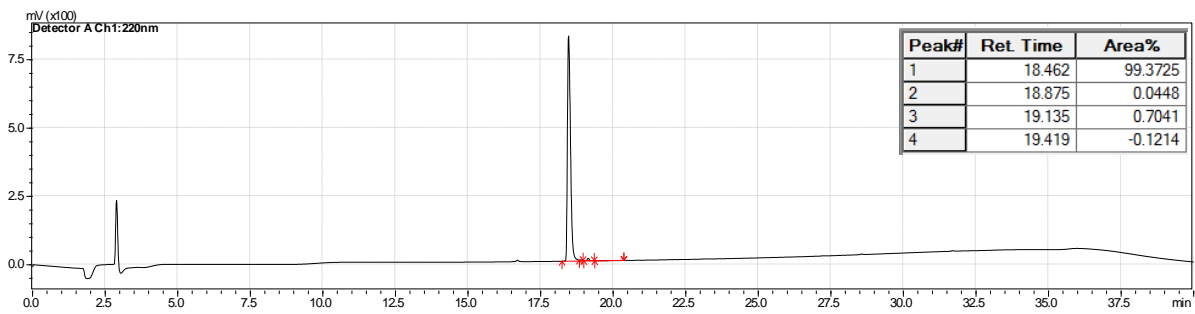

21-CSP-r13

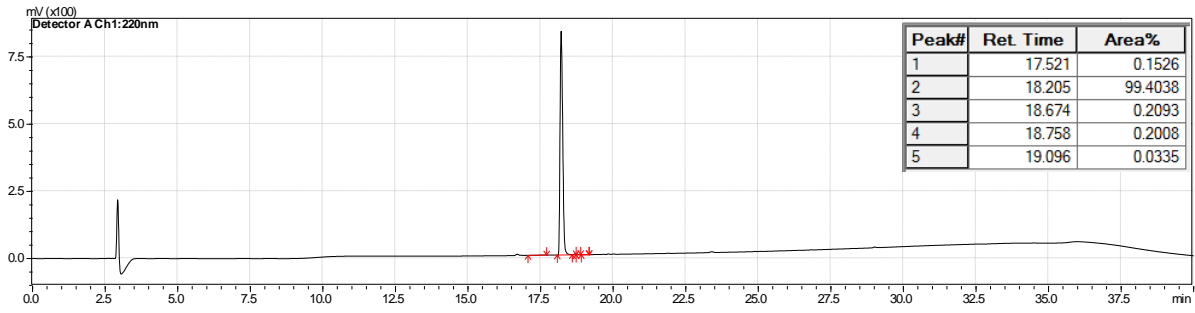

21-CSP-s14

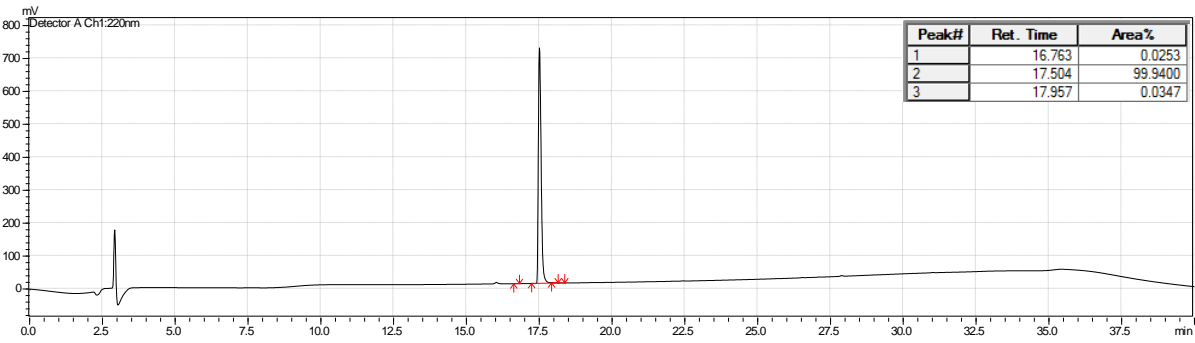

21-CSP-f15

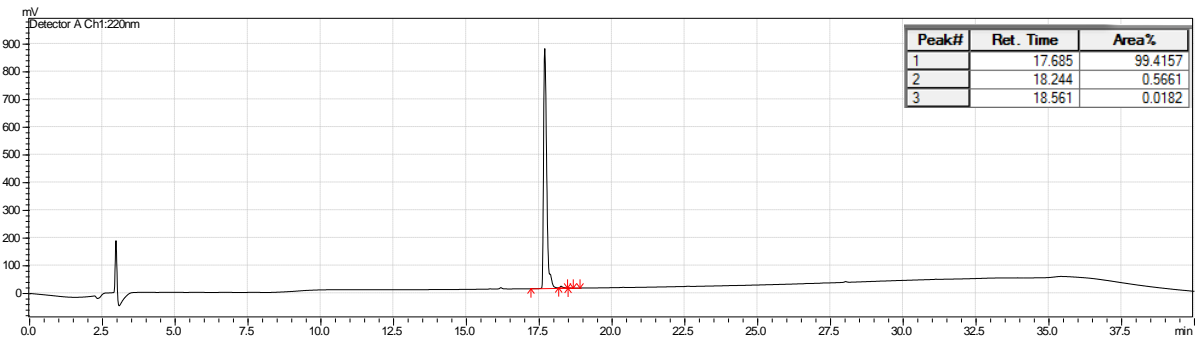

21-CSP-t16

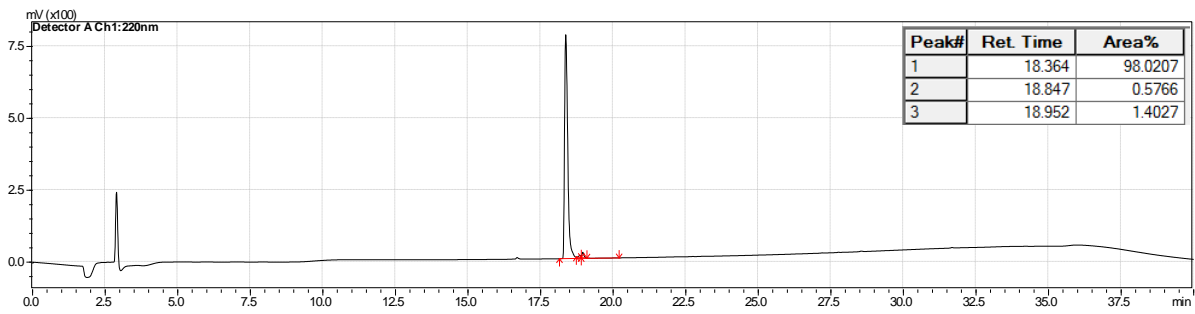

21-CSP-q17

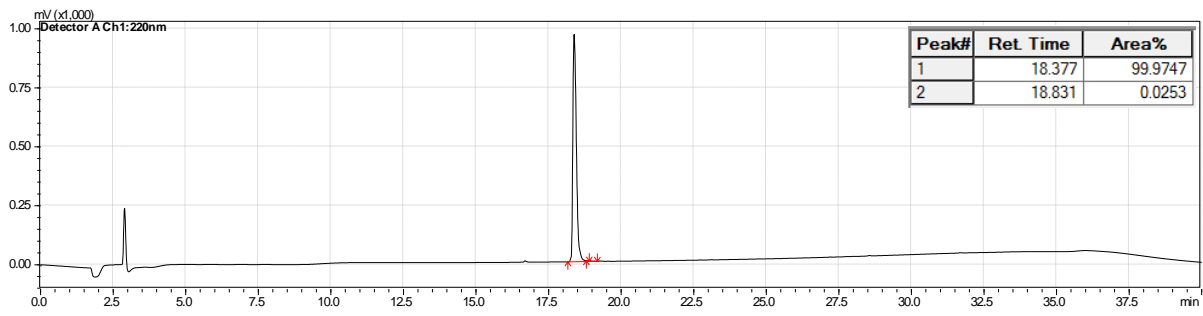

21-CSP-a18

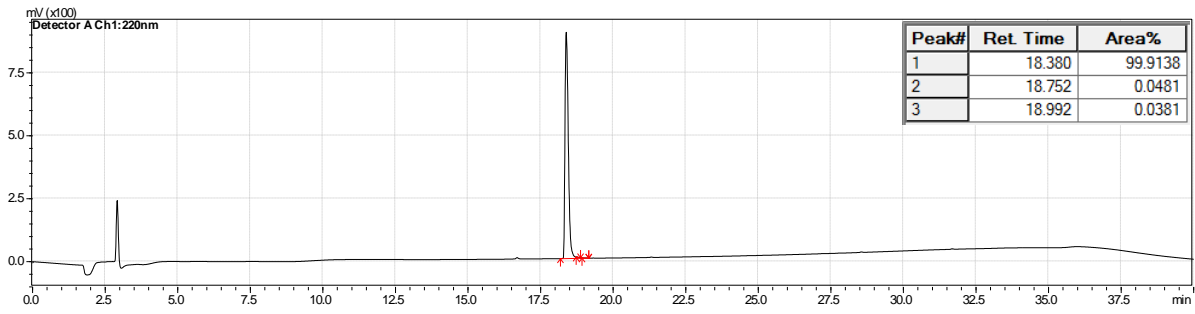

21-CSP-119

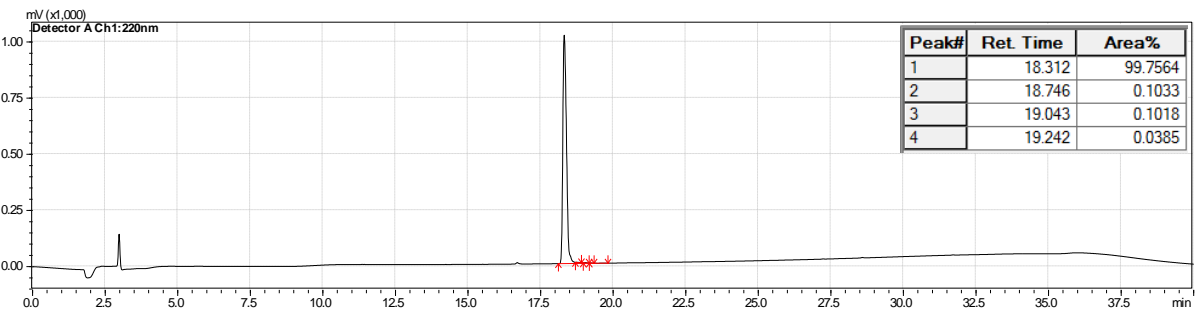

21-CSP-k21

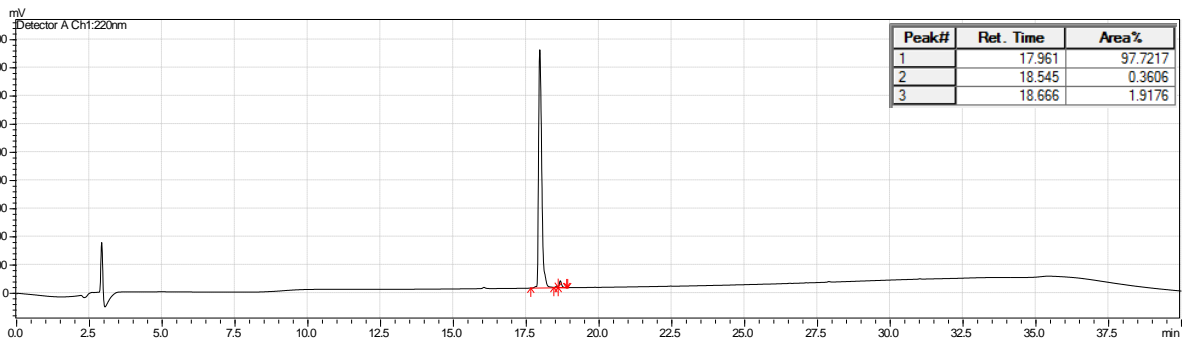

### 18-CSP-S1A

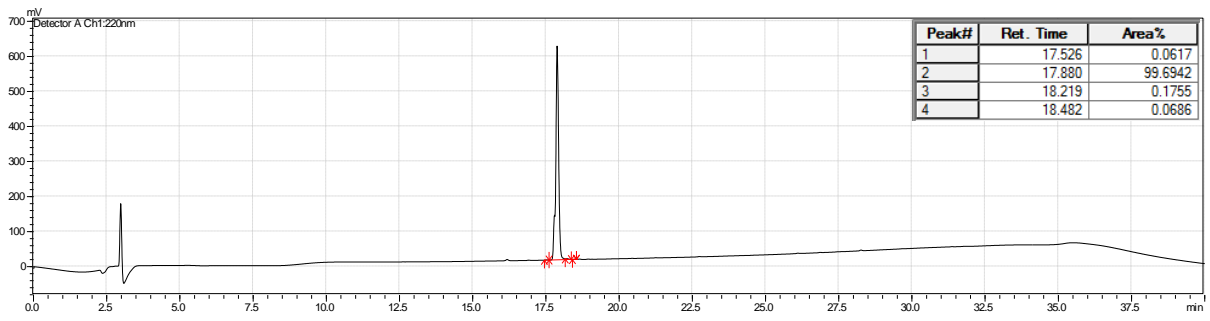

### 18-CSP-G2A

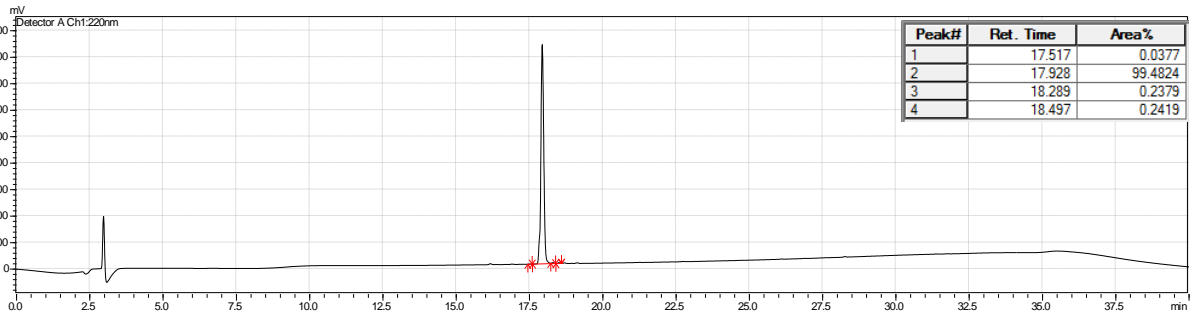

### 18-CSP-S3A

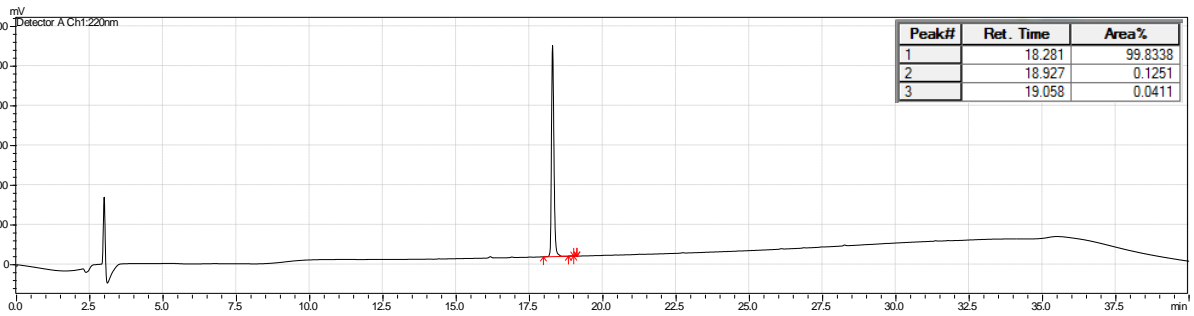

### 18-CSP-L4A

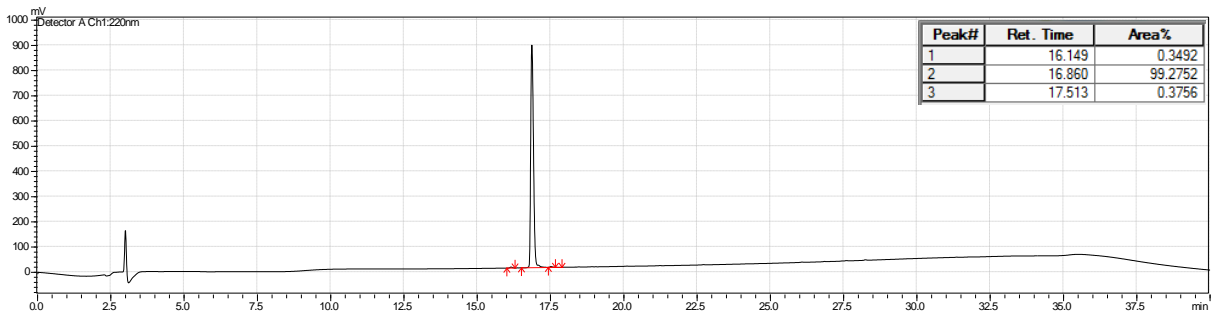

### 18-CSP-S5A

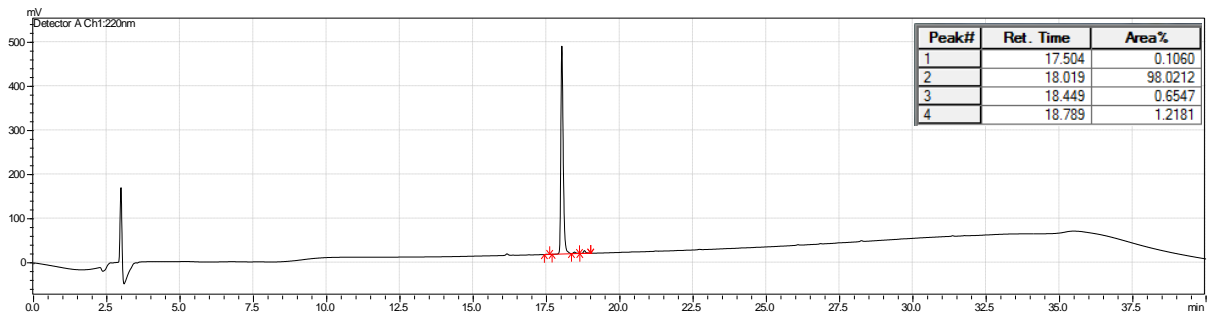

### 18-CSP-T6A

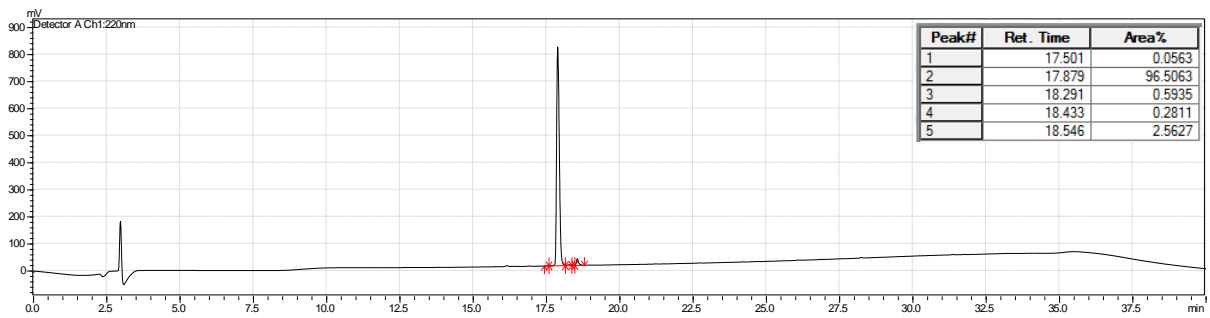

### 18-CSP-F7A

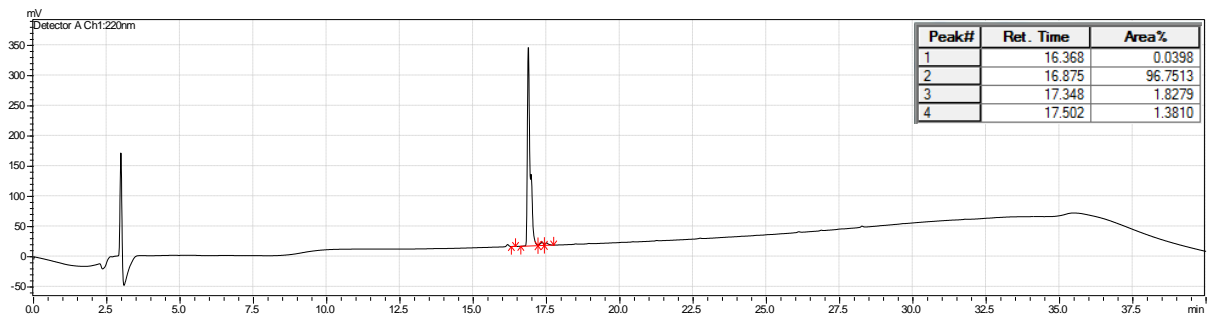

### 18-CSP-F8A

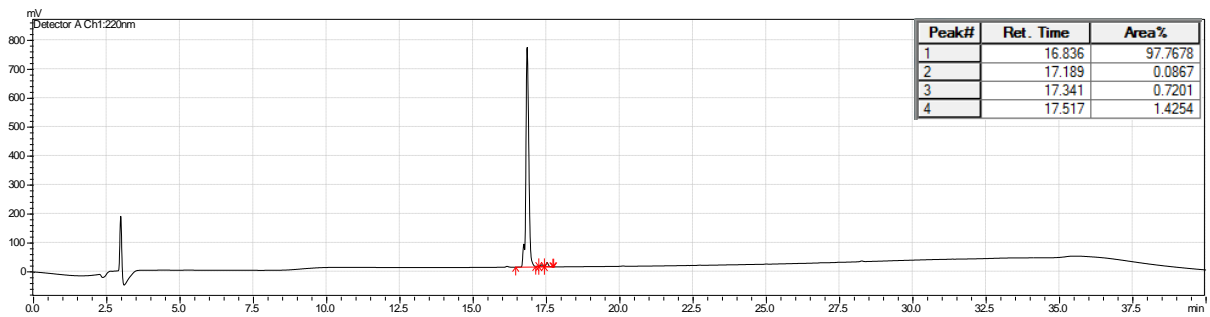

### 18-CSP-R9A

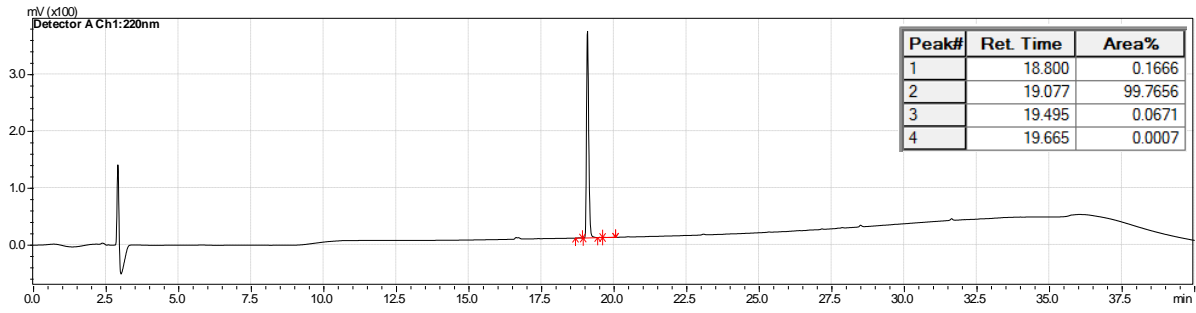

### 18-CSP-L10A

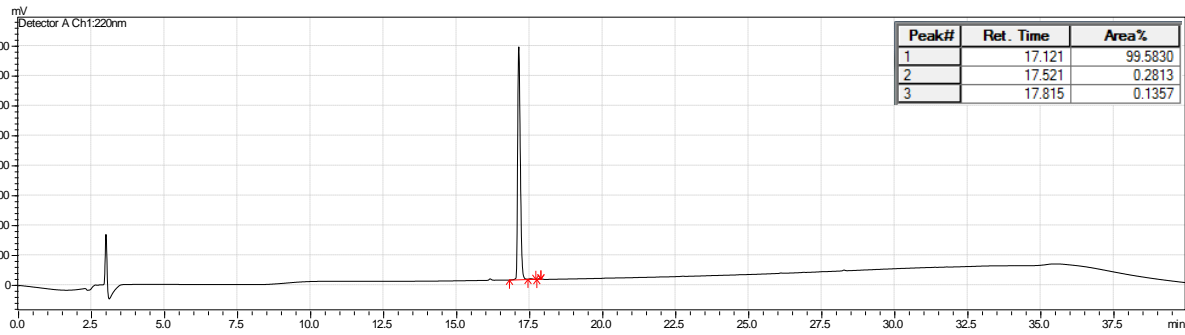

### 18-CSP-F11A

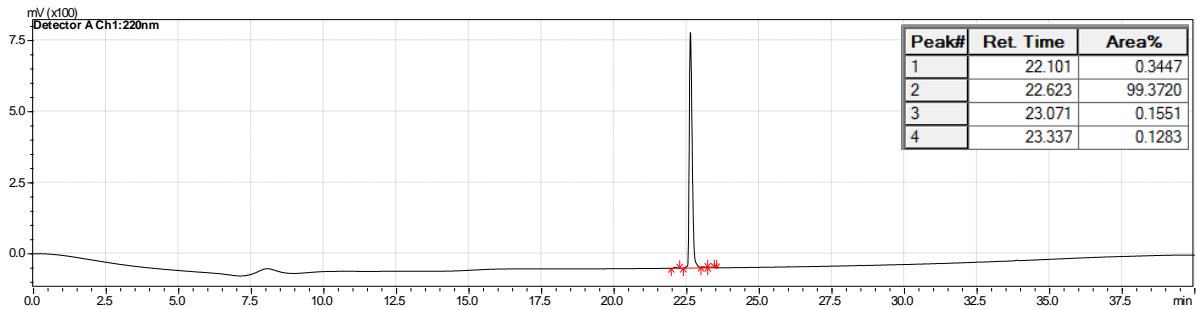

### 18-CSP-N12A

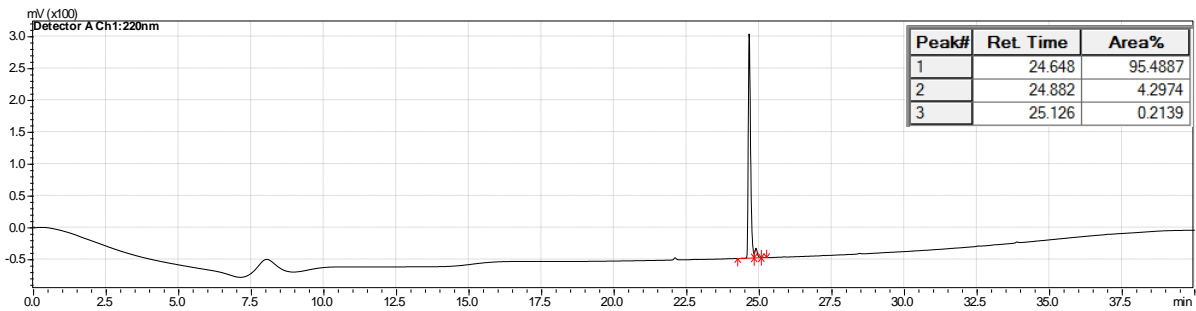



### 18-CSP-R13A

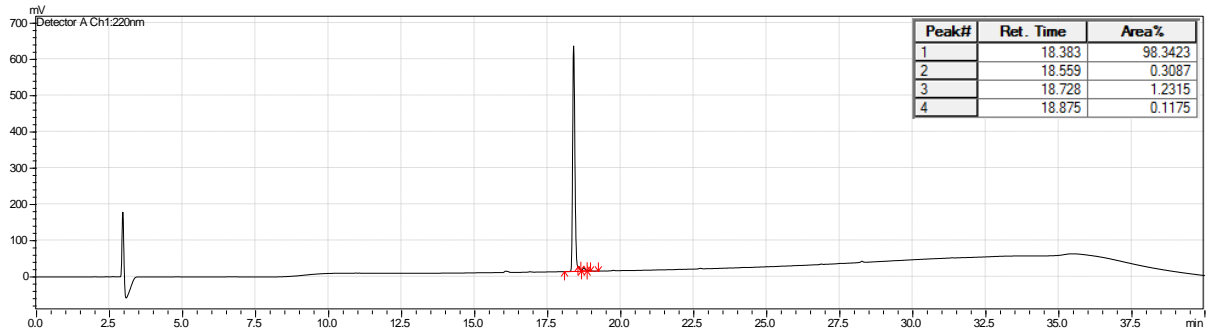

### 18-CSP-S14A

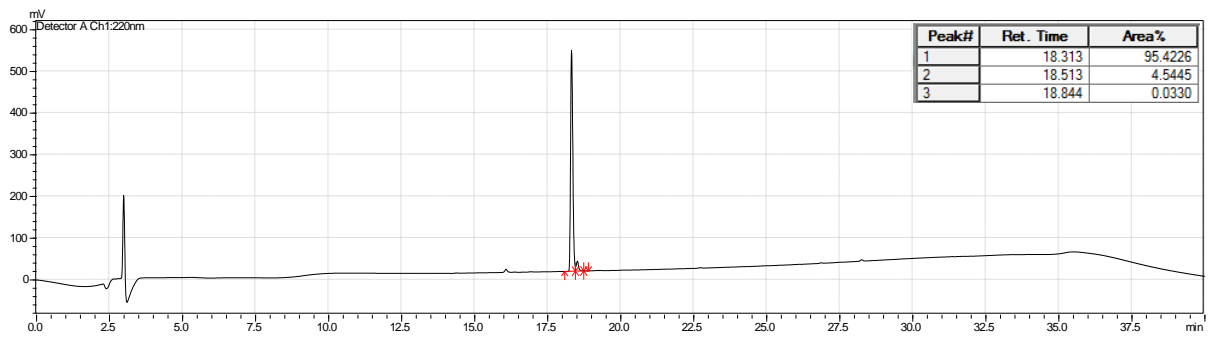

### 18-CSP-F15A

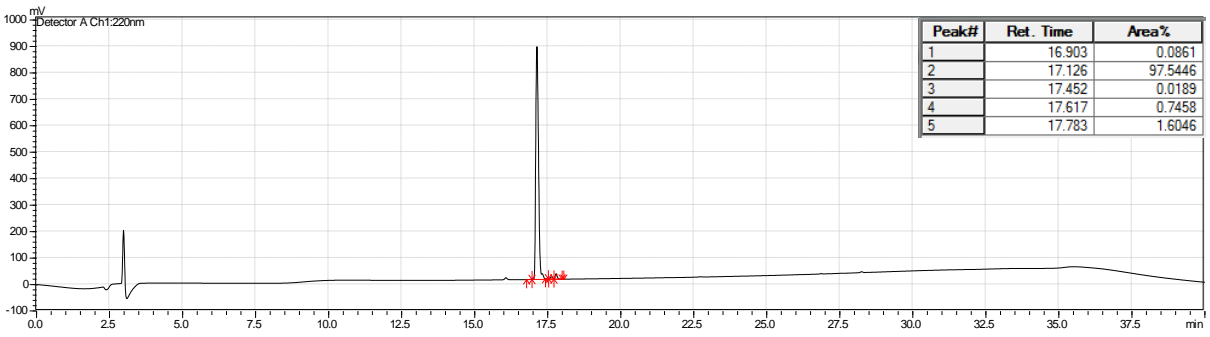

### 18-CSP-T16A

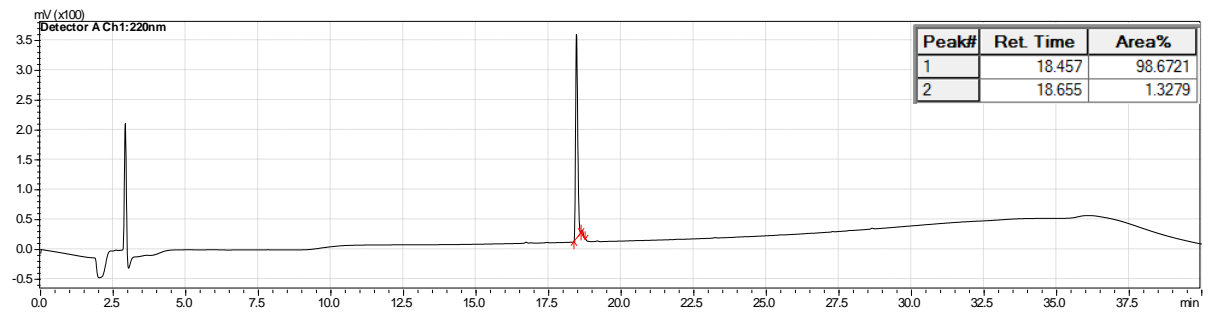

### 18-CSP-Q17A

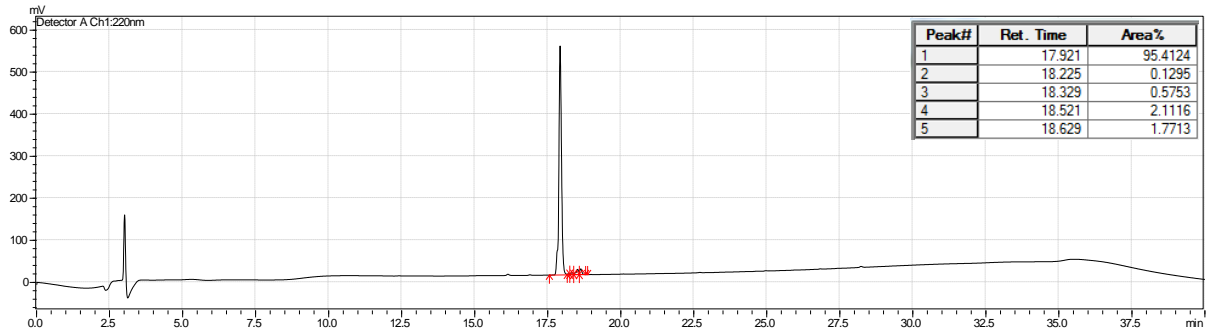

### 18-CSP-s1

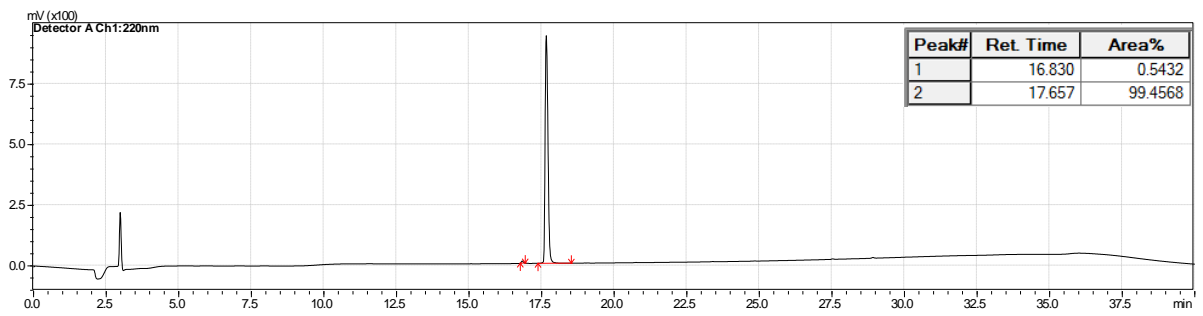

### 18-CSP-s3

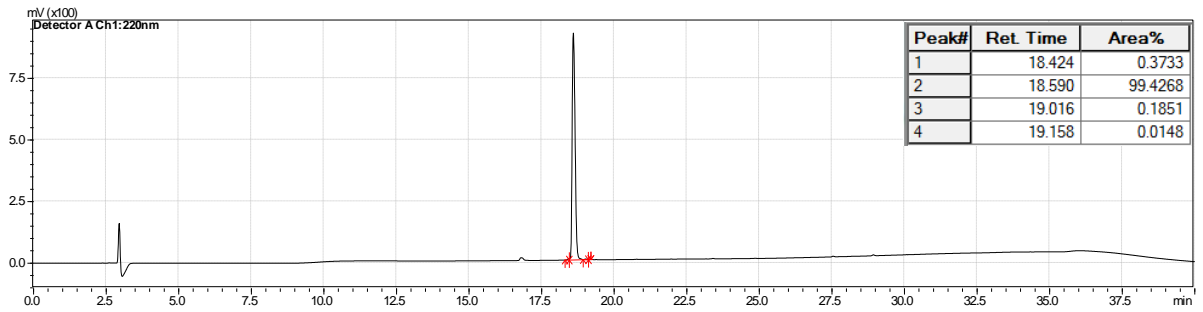

### 18-CSP-14

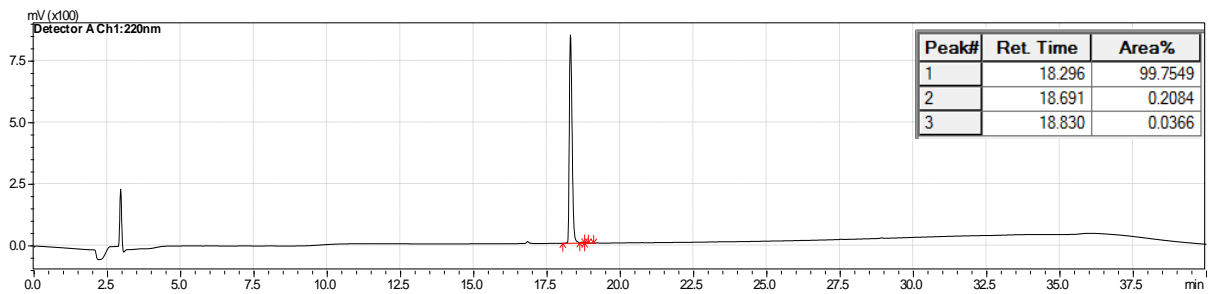

### 18-CSP-s5

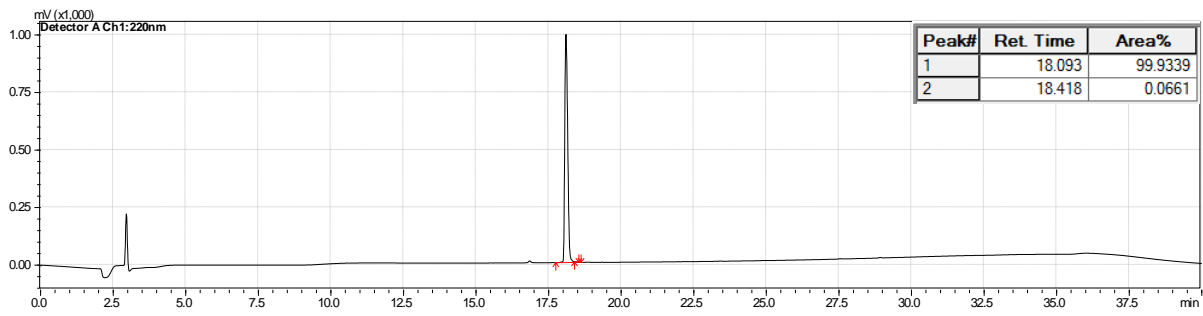

### 18-CSP-t6

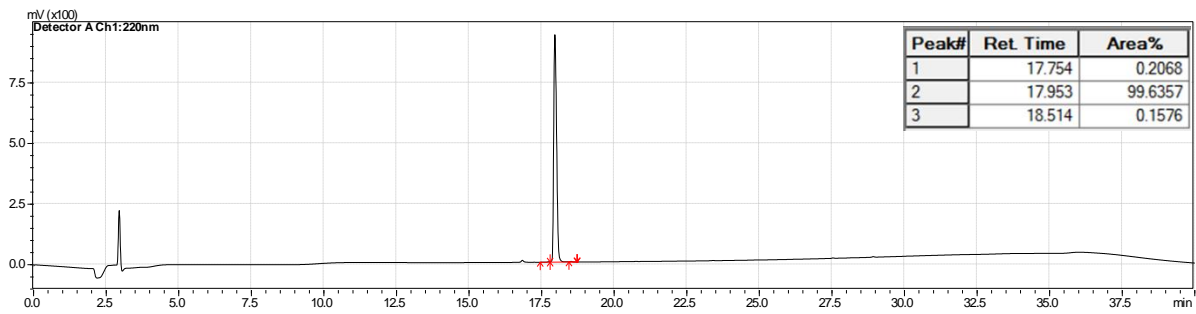

### 18-CSP-f7

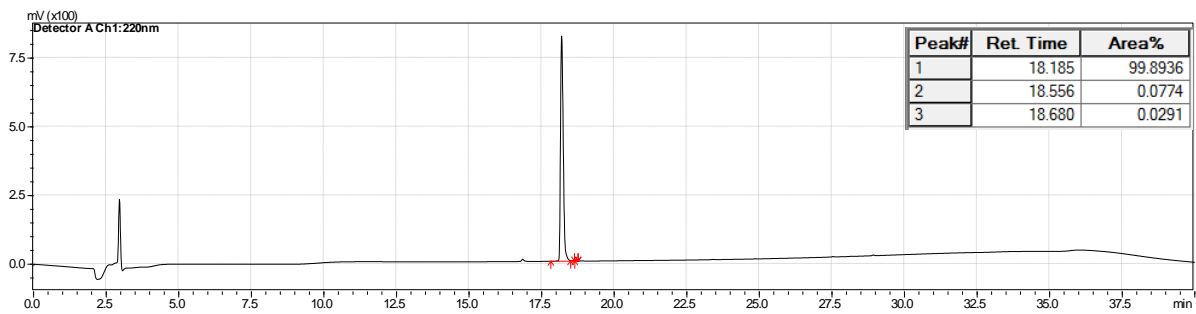

### 18-CSP-f8

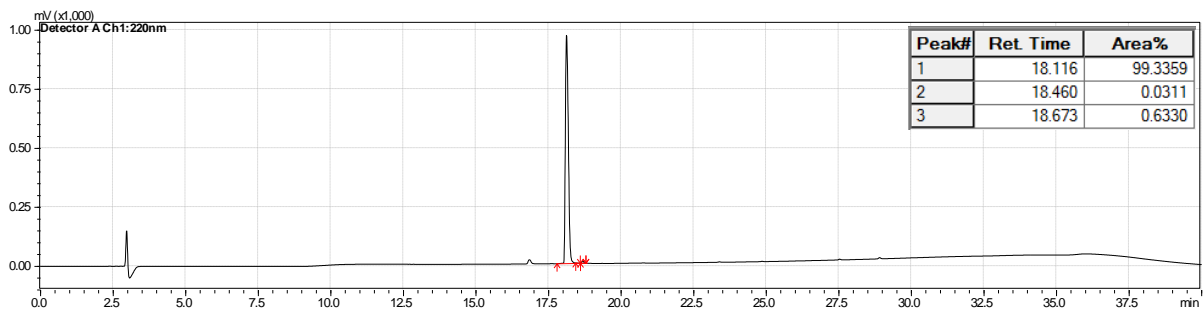

### 18-CSP-r9

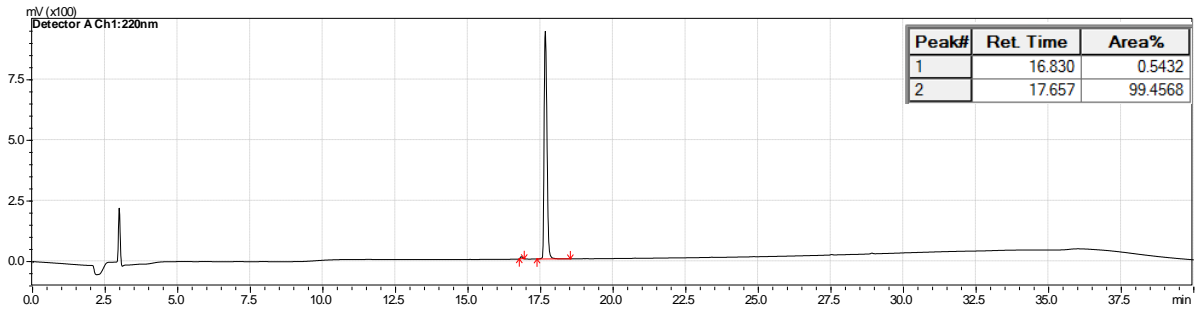

### 18-CSP-110

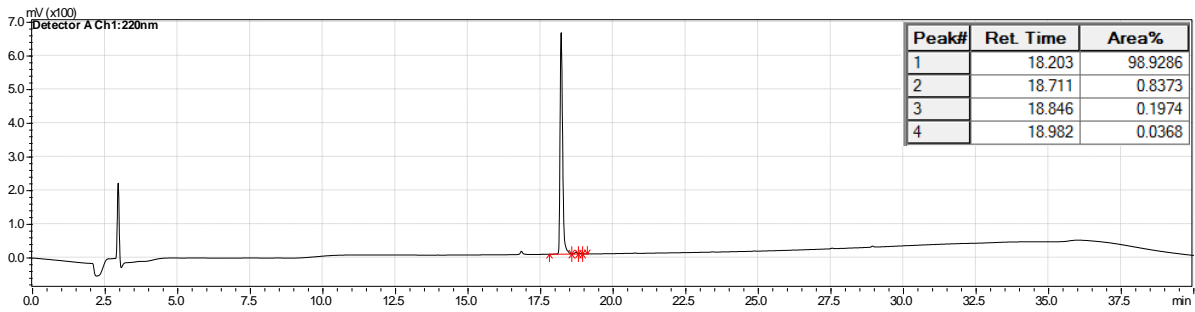

### 18-CSP-f11

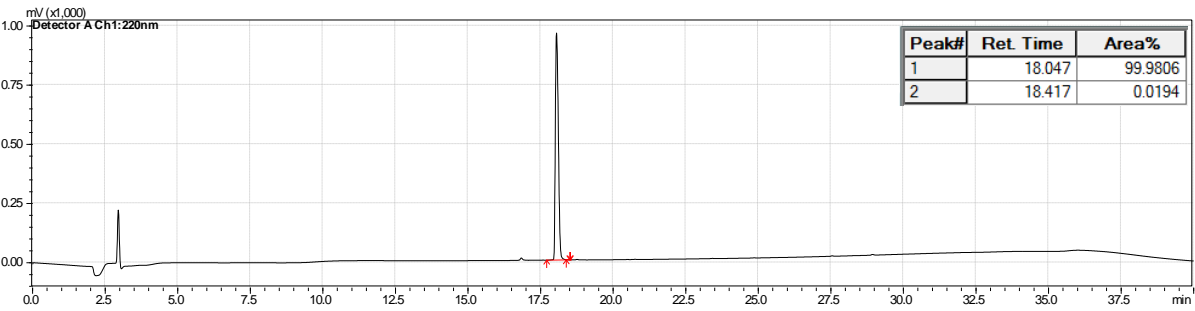

### 18-CSP-n12

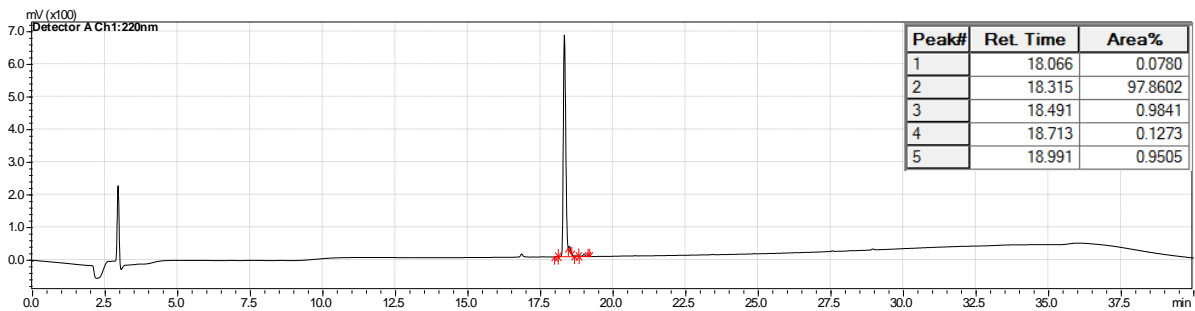

18-CSP-r13

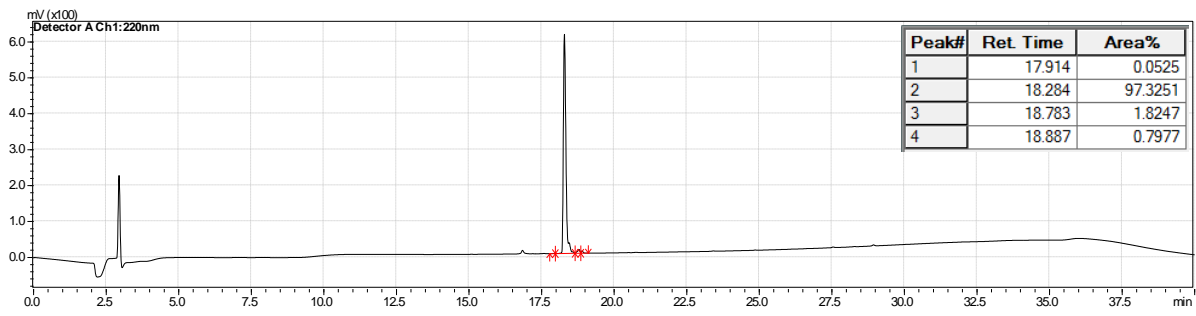

18-CSP-s14

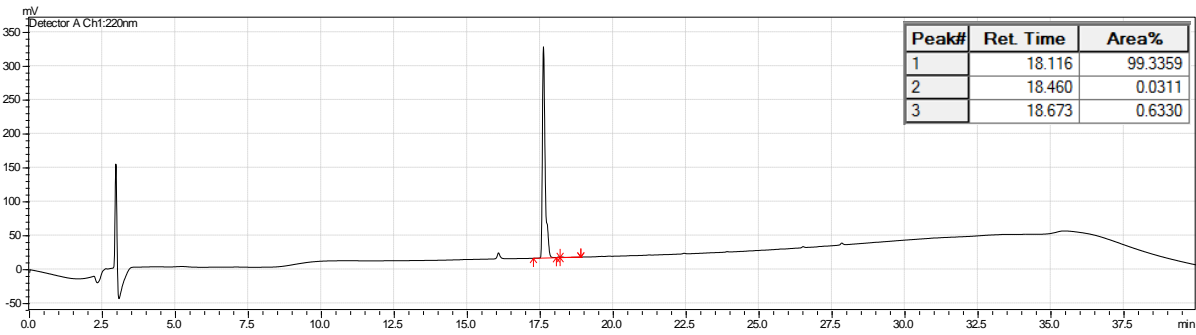

18-CSP-f15

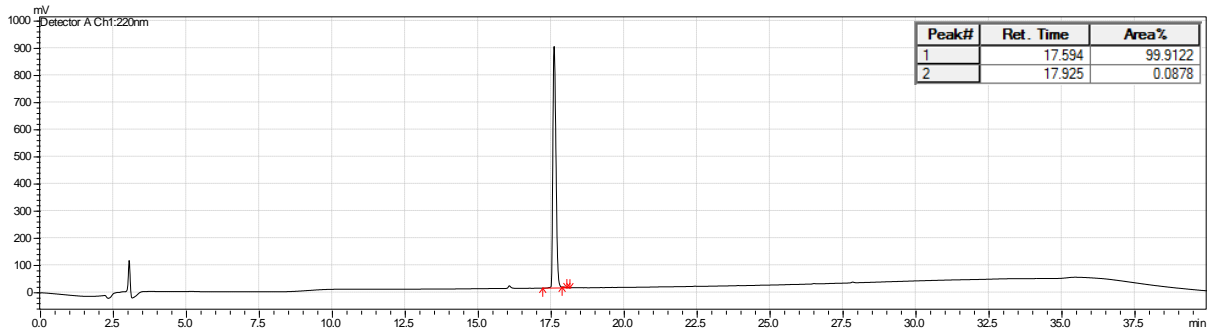

18-CSP-t16

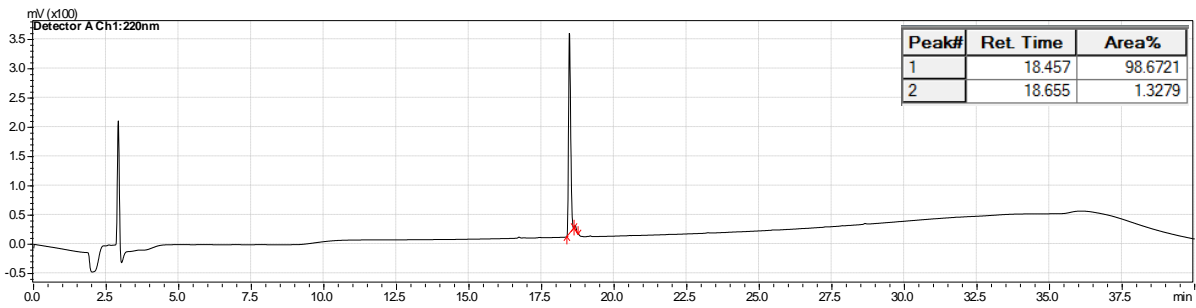

### 18-CSP-q17

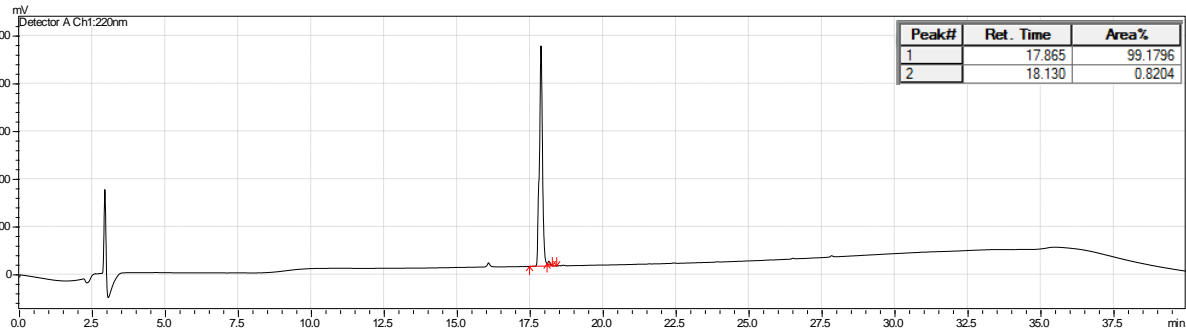

### 18-CSP-a18

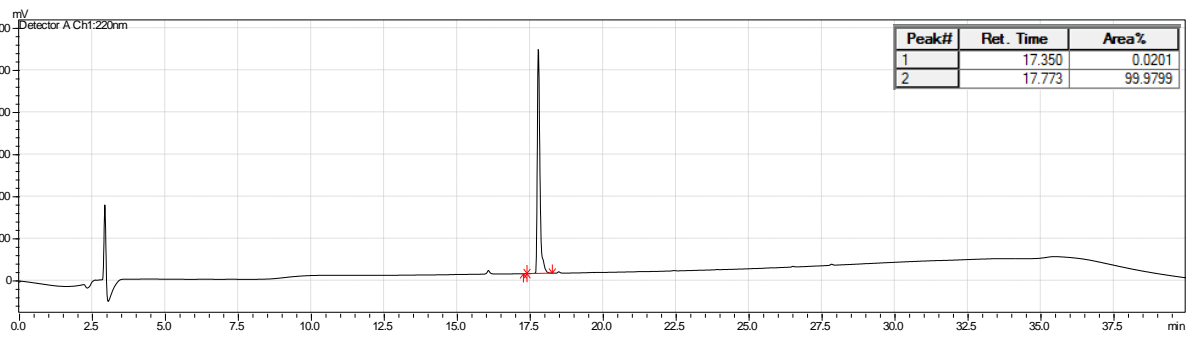

### 21-CSP-des-S1

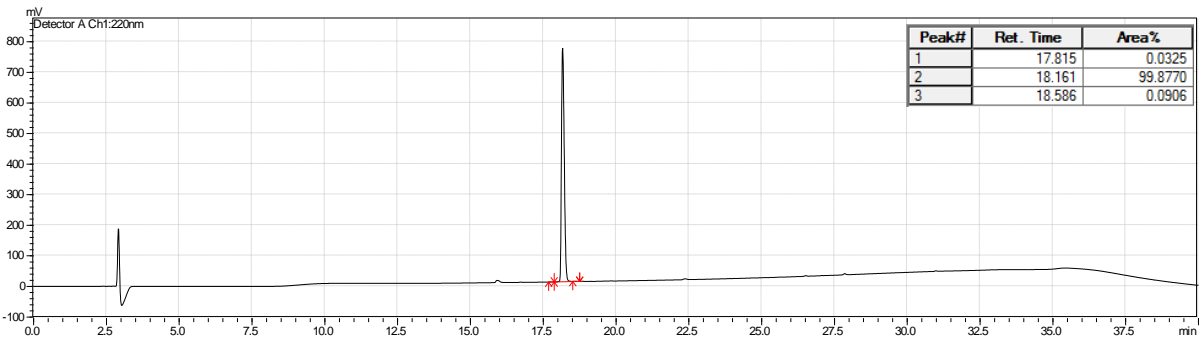

### 21-CSP-des-S1G2

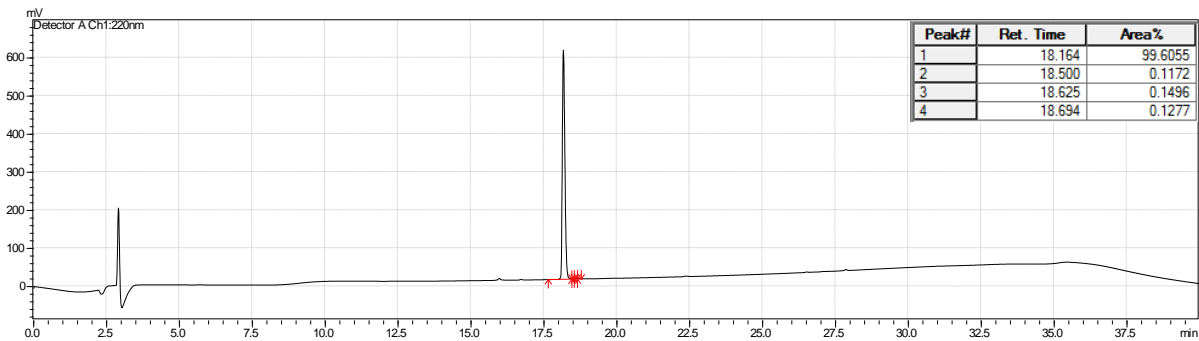

21-CSP-des-S1G2S3

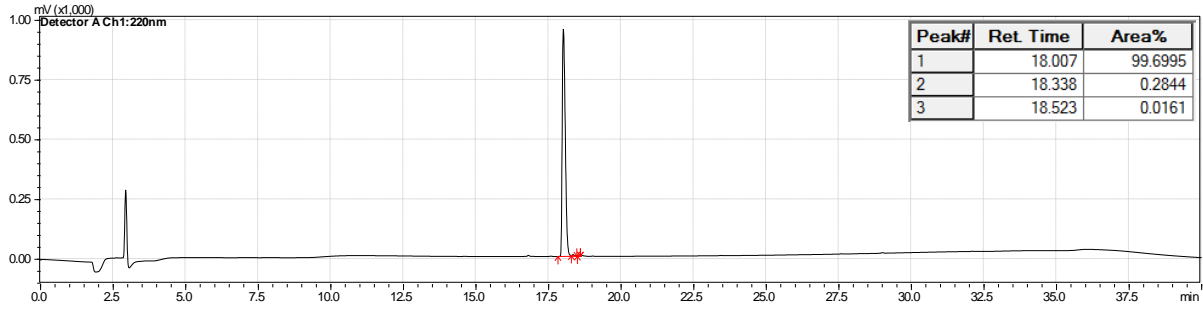

21-CSP-des-S1G2S3L4

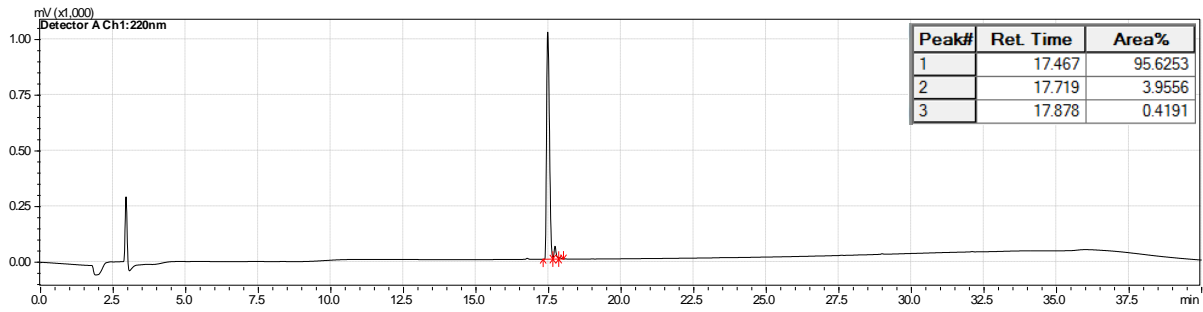

21-CSP-des-S1G2S3L4S5

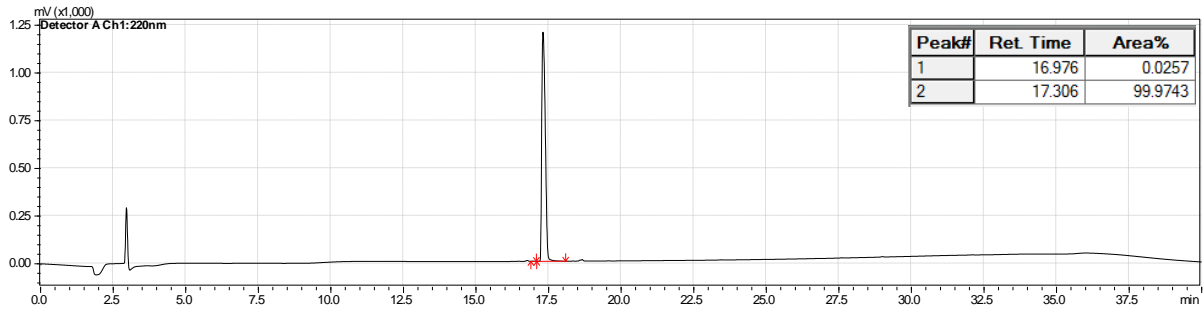

21-CSP-des-K21

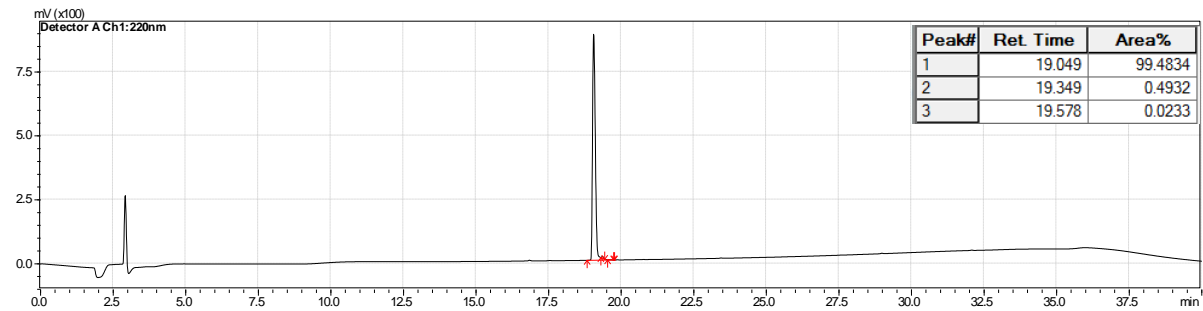

21-CSP-des-G20K21

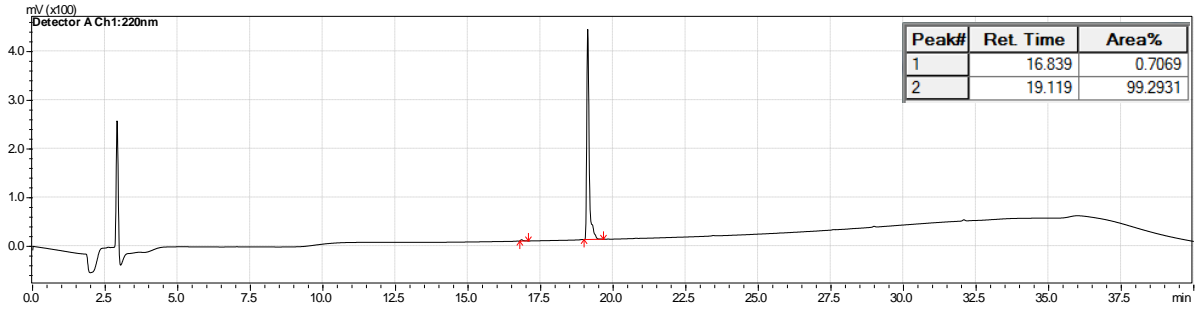

21-CSP-des-L19G20K21 (18-CSP)

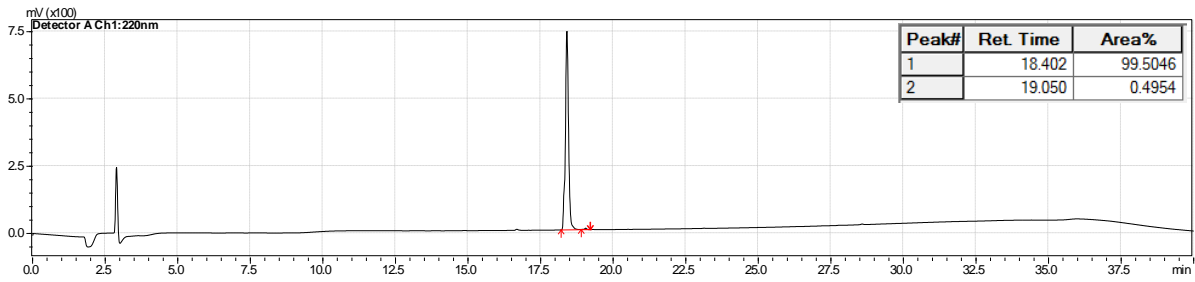

18-CSP-des-A18

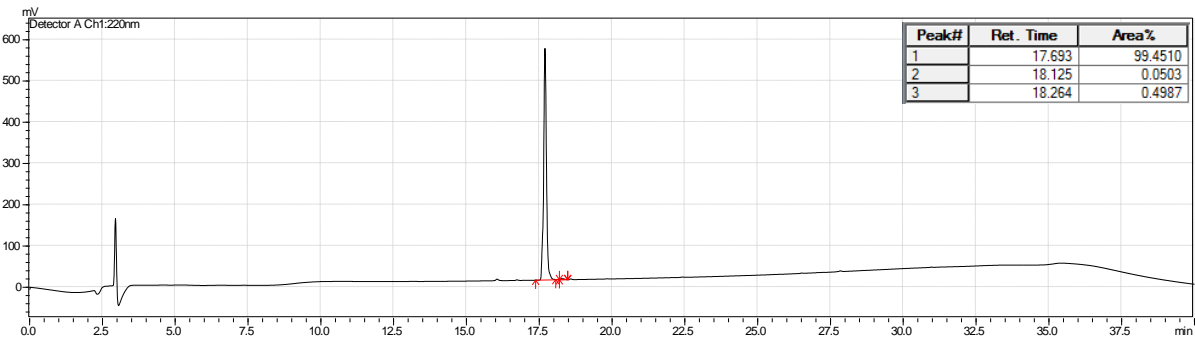

18-CSP-des-Q17A18

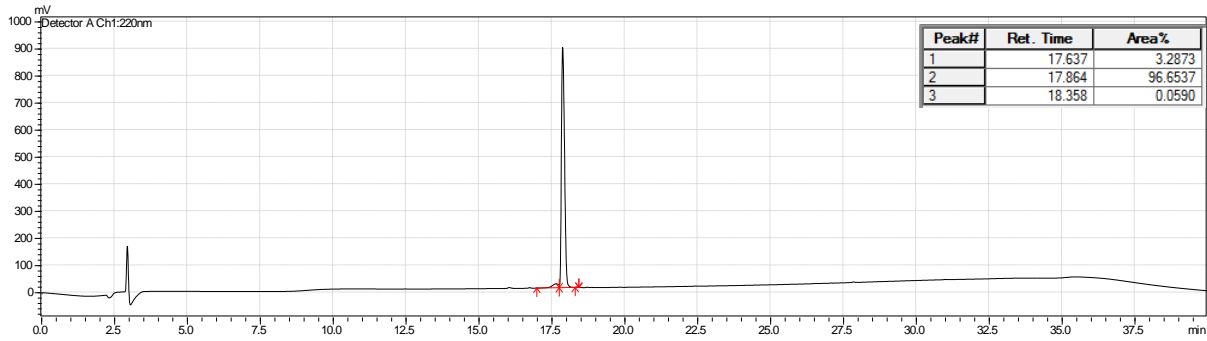



### 18-CSP-des-S1

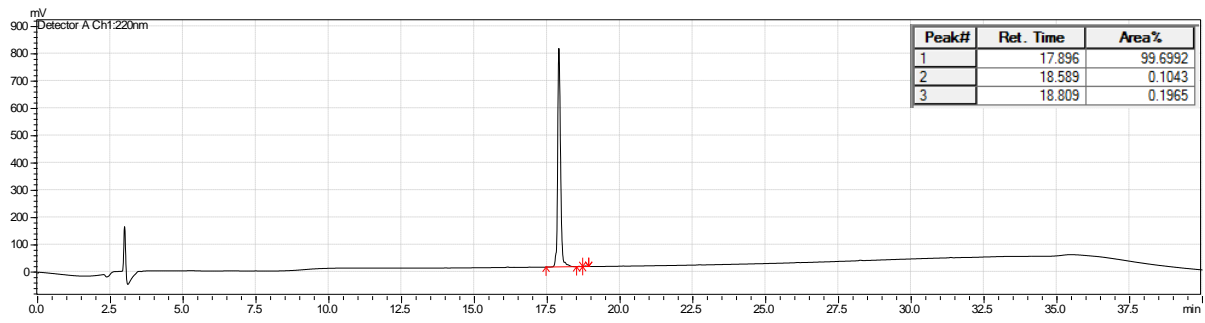

### 18-CSP-des-S1G2

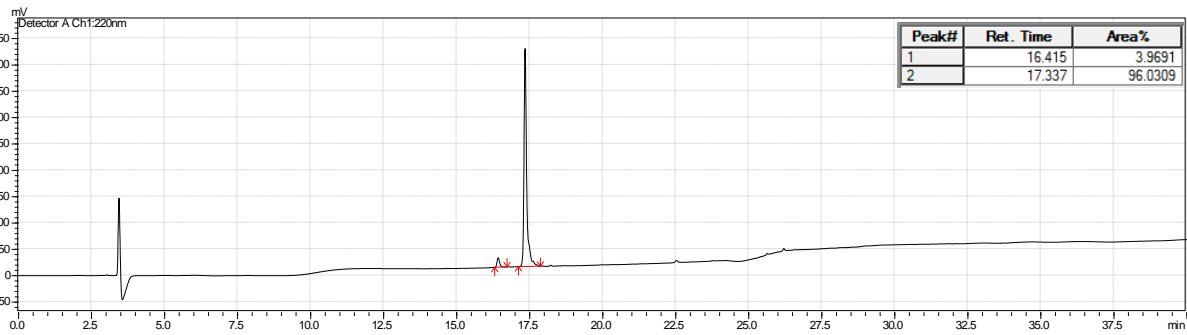

### 18-CSP-des-S1G2S3

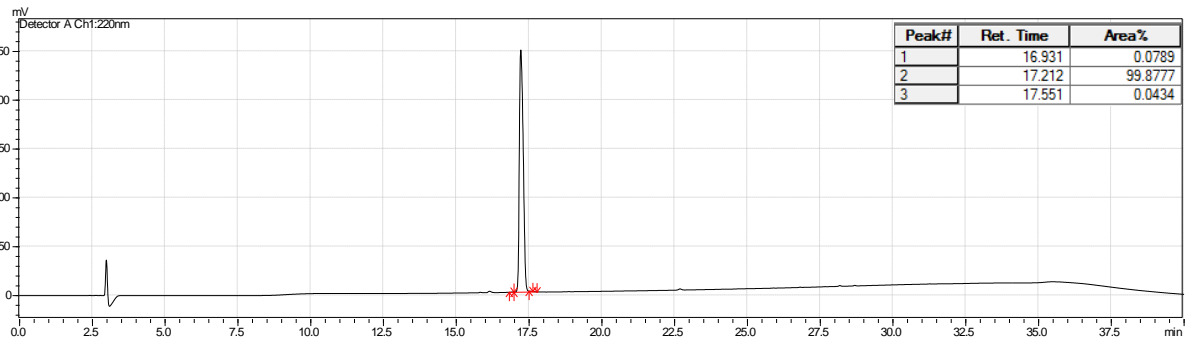

### 18-CSP-des-S1G2S3L4

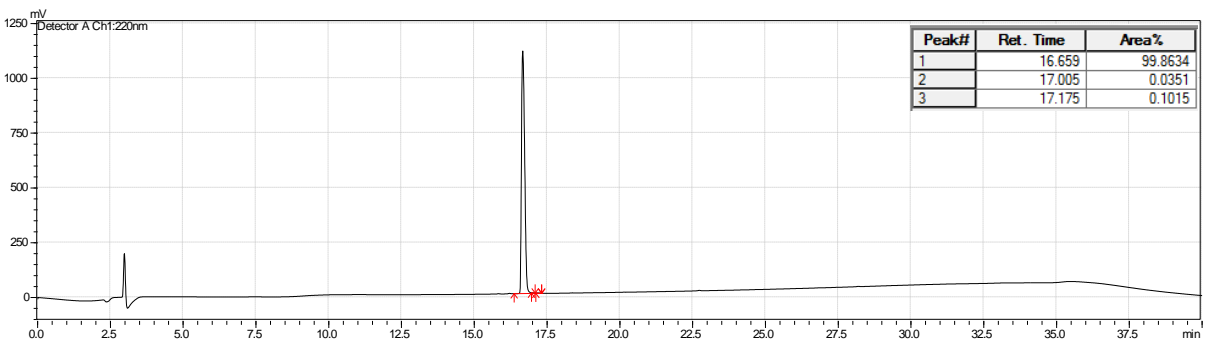

### 18-CSP-des-S1G2S3L4S5

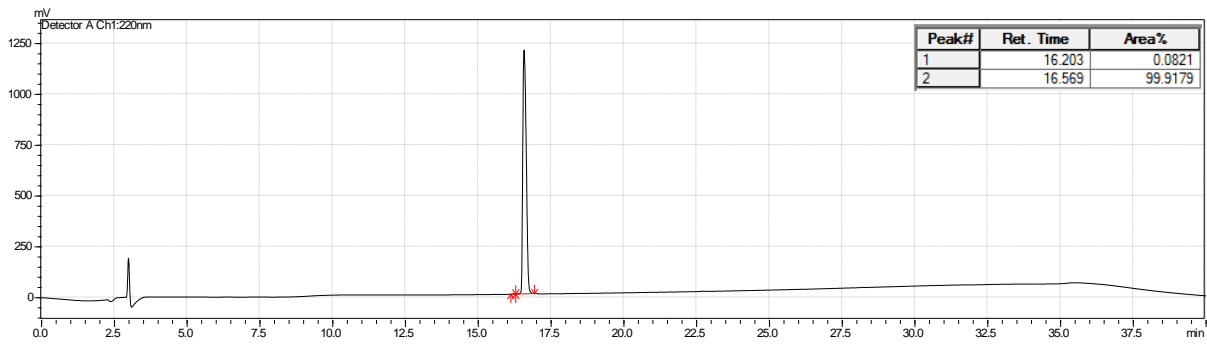

### 18-CSP-s1s314

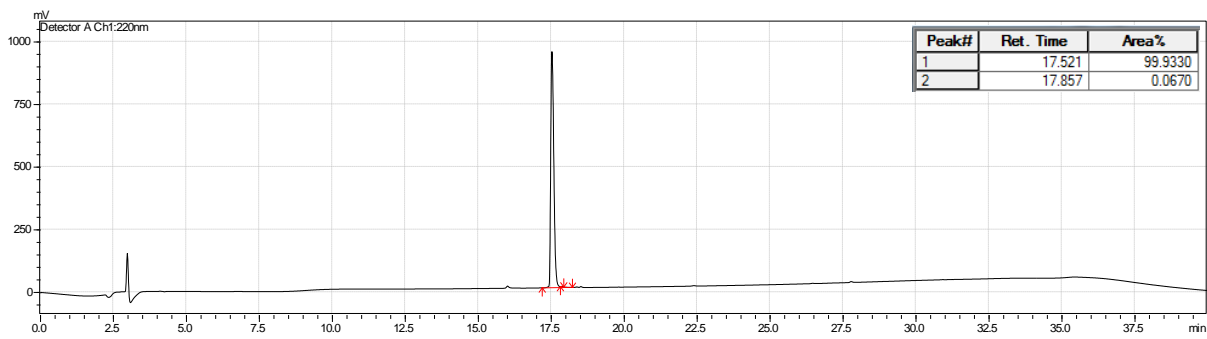

### 18-CSP-s1s314L10AR13AS14A

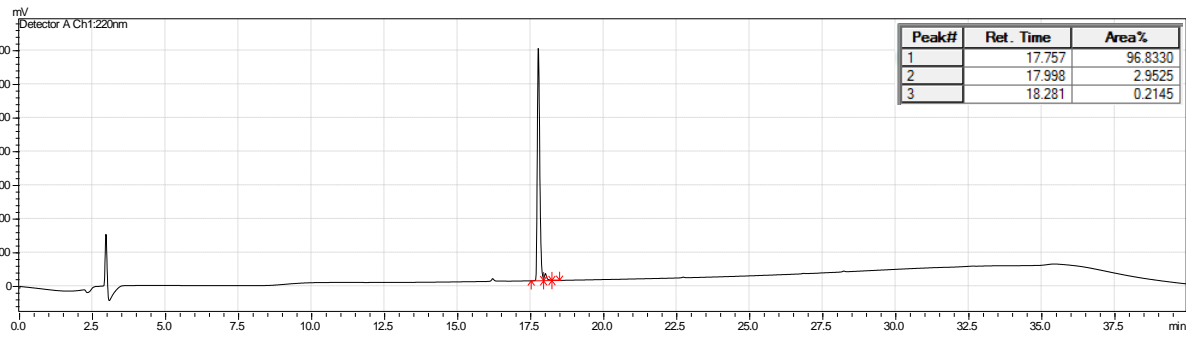

### 18-CSP-S1AL10AR13AS14A

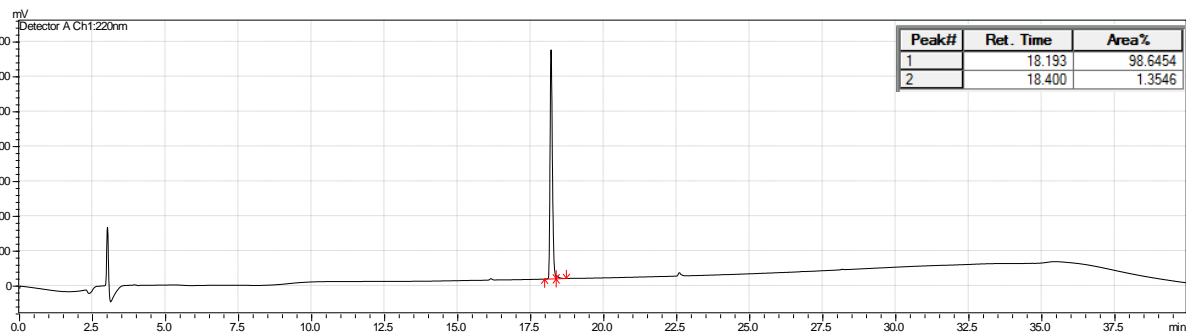

### 18-CSP-S3T

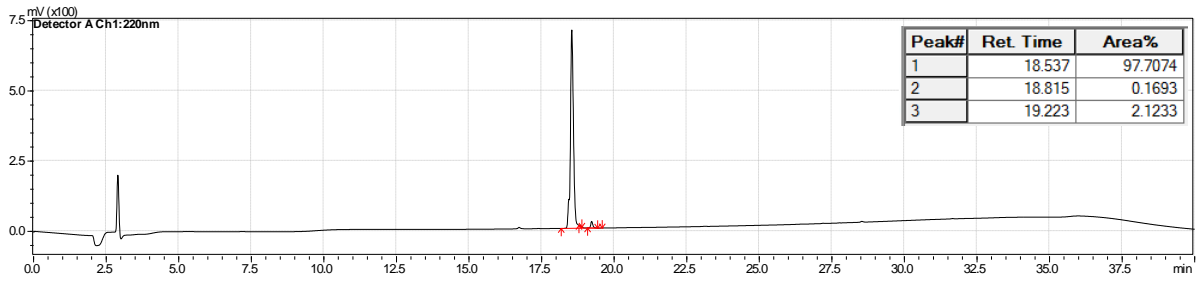

### 21-CSP-S3T

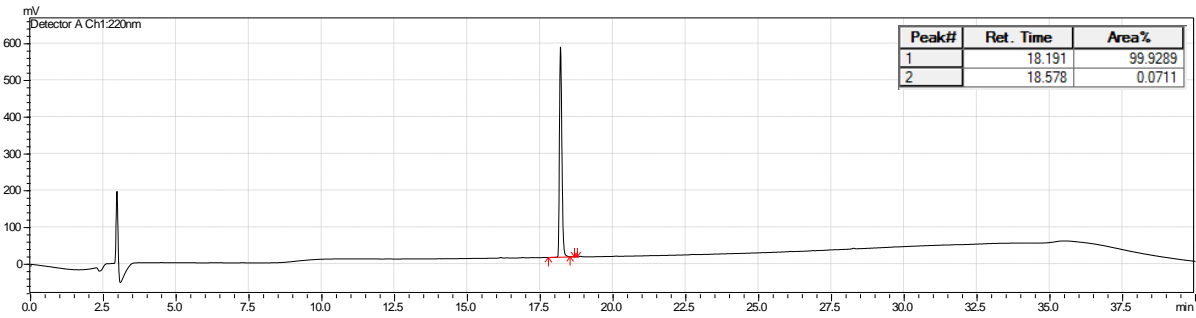

## MS and HPLC data for CSP analogs

**Table S-1.** MS and HPLC data for 21-CSP alanine & D-amino acid scanning analogs.

| Compound Name | Calc. EM<br>MH <sub>2</sub> <sup>2+</sup> | Obs. EM<br>MH <sub>2</sub> <sup>2+</sup> | Purity<br>(%) | Compound Name | Calc. EM<br>MH <sub>2</sub> <sup>2+</sup> | Obs. EM<br>MH <sub>2</sub> <sup>2+</sup> | Purity<br>(%) |
|---------------|-------------------------------------------|------------------------------------------|---------------|---------------|-------------------------------------------|------------------------------------------|---------------|
| 21-CSP        | 1183.1280                                 | 1183.1260                                | >99           |               |                                           |                                          |               |
| 21-CSP-S1A    | 1175.6291                                 | 1175.6294                                | >99           | 21-CSP-s1     | 1183.1280                                 | 1183.1249                                | >97           |
| 21-CSP-G2A    | 1190.1358                                 | 1190.1329                                | >99           |               |                                           |                                          |               |
| 21-CSP-S3A    | 1175.6291                                 | 1175.6287                                | >99           | 21-CSP-s3     | 1183.1280                                 | 1183.1296                                | >99           |
| 21-CSP-L4A    | 1162.1045                                 | 1162.1029                                | >99           | 21-CSP-l4     | 1183.1280                                 | 1183.1330                                | >97           |
| 21-CSP-S5A    | 1175.6291                                 | 1175.6292                                | >98           | 21-CSP-s5     | 1183.1280                                 | 1183.1324                                | >99           |
| 21-CSP-T6A    | 1168.1230                                 | 1168.1203                                | >99           | 21-CSP-t6     | 1183.1280                                 | 1183.1332                                | >99           |
| 21-CSP-F7A    | 1145.1124                                 | 1145.1091                                | >96           | 21-CSP-f7     | 1183.1280                                 | 1183.1329                                | >99           |
| 21-CSP-F8A    | 1145.1124                                 | 1145.1103                                | >99           | 21-CSP-f8     | 1183.1280                                 | 1183.1300                                | >99           |
| 21-CSP-R9A    | 1140.5960                                 | 1140.5929                                | >95           | 21-CSP-r9     | 1183.1280                                 | 1183.1296                                | >99           |
| 21-CSP-L10A   | 1162.1045                                 | 1162.1024                                | >99           | 21-CSP-l10    | 1183.1280                                 | 1183.1325                                | >96           |
| 21-CSP-F11A   | 1145.1124                                 | 1145.1099                                | >99           | 21-CSP-f11    | 1183.1280                                 | 1183.1322                                | >99           |
| 21-CSP-N12A   | 1161.6251                                 | 1161.6229                                | >98           | 21-CSP-n12    | 1183.1280                                 | 1183.1294                                | >99           |
| 21-CSP-R13A   | 1140.5960                                 | 1140.5932                                | >98           | 21-CSP-r13    | 1183.1280                                 | 1183.1282                                | >99           |
| 21-CSP-S14A   | 1175.6291                                 | 1175.6281                                | >98           | 21-CSP-s14    | 1183.1280                                 | 1183.1287                                | >99           |
| 21-CSP-F15A   | 1145.1124                                 | 1145.1095                                | >98           | 21-CSP-f15    | 1183.1280                                 | 1183.1284                                | >99           |
| 21-CSP-T16A   | 1168.1230                                 | 1168.1195                                | >98           | 21-CSP-t16    | 1183.1280                                 | 1183.1288                                | >98           |
| 21-CSP-Q17A   | 1154.6175                                 | 1154.6138                                | >95           | 21-CSP-q17    | 1183.1280                                 | 1183.1257                                | >99           |
|               |                                           |                                          |               | 21-CSP-a18    | 1183.1280                                 | 1183.1301                                | >99           |
| 21-CSP-L19A   | 1162.1045                                 | 1162.1008                                | >99           | 21-CSP-l19    | 1183.1280                                 | 1183.1300                                | >99           |
| 21-CSP-G20A   | 1190.1358                                 | 1190.1330                                | >99           |               |                                           |                                          |               |
| 21-CSP-K21A   | 1154.5991                                 | 1154.5965                                | >97           | 21-CSP-k21    | 1183.1280                                 | 1183.1258                                | >97           |

EM = Exact Mass. See main text for methods.

**Table S-2.** MS and HPLC data for 21-CSP and 18-CSP truncated analogs.

| Compound Name         | Calc. EM<br>MH <sub>2</sub> <sup>2+</sup> | Obs. EM<br>MH <sub>2</sub> <sup>2+</sup> | Purity<br>(%) |
|-----------------------|-------------------------------------------|------------------------------------------|---------------|
| 21-CSP-des-S1         | 1139.6120                                 | 1139.6116                                | >99           |
| 21-CSP-des-S1G2       | 1111.1013                                 | 1111.1006                                | >99           |
| 21-CSP-des-S1G2S3     | 1067.5853                                 | 1067.5871                                | >99           |
| 21-CSP-des-S1G2S3L4   | 1011.0432                                 | 1011.0430                                | >95           |
| 21-CSP-des-S1G2S3L4S5 | 967.5272                                  | 967.5232                                 | >99           |
| 21-CSP-des-K21        | 1119.0805                                 | 1119.0827                                | >99           |
| 21-CSP-des-G20K21     | 1090.5698                                 | 1090.5706                                | >99           |
| 18-CSP-des-S1         | 990.5118                                  | 990.5131                                 | >99           |
| 18-CSP-des-S1G2       | 962.0010                                  | 961.9970                                 | >96           |
| 18-CSP-des-S1G2S3     | 918.4850                                  | 918.4848                                 | >99           |
| 18-CSP-des-S1G2S3L4   | 861.4415                                  | 861.4402                                 | >99           |
| 18-CSP-des-S1G2S3L4S5 | 817.9255                                  | 817.9263                                 | >99           |
| 18-CSP-des-A18        | 998.5092                                  | 998.5065                                 | >99           |
| 18-CSP-des-Q17A18     | 934.4799                                  | 934.4802                                 | >96           |

EM = Exact Mass. See main text for methods.

**Table S-3.** MS and HPLC data for 18-CSP alanine & D-amino acid scanning analogs.

| <b>Compound Name</b> | <b>Calc. EM<br/>MH<sub>2</sub><sup>2+</sup></b> | <b>Obs. EM<br/>MH<sub>2</sub><sup>2+</sup></b> | <b>Purity<br/>(%)</b> | <b>Compound Name</b> | <b>Calc. EM<br/>MH<sub>2</sub><sup>2+</sup></b> | <b>Obs. EM<br/>MH<sub>2</sub><sup>2+</sup></b> | <b>Purity<br/>(%)</b> |
|----------------------|-------------------------------------------------|------------------------------------------------|-----------------------|----------------------|-------------------------------------------------|------------------------------------------------|-----------------------|
| 18-CSP               | 1034.0278                                       | 1034.0261                                      | >99                   |                      |                                                 |                                                |                       |
| 18-CSP-S1A           | 1026.0303                                       | 1026.0315                                      | >99                   | 18-CSP-s1            | 1034.0278                                       | 1034.0305                                      | >99                   |
| 18-CSP-G2A           | 1041.0356                                       | 1041.0354                                      | >99                   |                      |                                                 |                                                |                       |
| 18-CSP-S3A           | 1026.0303                                       | 1026.0330                                      | >99                   | 18-CSP-s3            | 1034.0278                                       | 1034.0323                                      | >99                   |
| 18-CSP-L4A           | 1013.0043                                       | 1013.0085                                      | >99                   | 18-CSP-l4            | 1034.0278                                       | 1034.0284                                      | >99                   |
| 18-CSP-S5A           | 1026.0303                                       | 1026.0289                                      | >98                   | 18-CSP-s5            | 1034.0278                                       | 1034.0299                                      | >99                   |
| 18-CSP-T6A           | 1019.0225                                       | 1019.0255                                      | >96                   | 18-CSP-t6            | 1034.0278                                       | 1034.0287                                      | >99                   |
| 18-CSP-F7A           | 996.0121                                        | 996.0167                                       | >96                   | 18-CSP-f7            | 1034.0278                                       | 1034.0304                                      | >99                   |
| 18-CSP-F8A           | 996.0121                                        | 996.0125                                       | >97                   | 18-CSP-f8            | 1034.0278                                       | 1034.0313                                      | >96                   |
| 18-CSP-R9A           | 991.4958                                        | 991.4975                                       | >99                   | 18-CSP-r9            | 1034.0278                                       | 1034.0317                                      | >99                   |
| 18-CSP-L10A          | 1013.0043                                       | 1013.0057                                      | >99                   | 18-CSP-l10           | 1034.0278                                       | 1034.0283                                      | >98                   |
| 18-CSP-F11A          | 996.0121                                        | 996.0125                                       | >99                   | 18-CSP-f11           | 1034.0278                                       | 1034.0295                                      | >99                   |
| 18-CSP-N12A          | 1012.5249                                       | 1012.5214                                      | >95                   | 18-CSP-n12           | 1034.0278                                       | 1034.0302                                      | >97                   |
| 18-CSP-R13A          | 991.4958                                        | 991.4958                                       | >98                   | 18-CSP-r13           | 1034.0278                                       | 1034.0299                                      | >97                   |
| 18-CSP-S14A          | 1026.0303                                       | 1026.0318                                      | >95                   | 18-CSP-s14           | 1034.0278                                       | 1034.0296                                      | >99                   |
| 18-CSP-F15A          | 996.0121                                        | 996.0110                                       | >97                   | 18-CSP-f15           | 1034.0278                                       | 1034.0298                                      | >99                   |
| 18-CSP-T16A          | 1019.0225                                       | 1019.0230                                      | >98                   | 18-CSP-t16           | 1034.0278                                       | 1034.0300                                      | >98                   |
| 18-CSP-Q17A          | 1005.5170                                       | 1005.5187                                      | >95                   | 18-CSP-q17           | 1034.0278                                       | 1034.0303                                      | >99                   |
|                      |                                                 |                                                |                       | 18-CSP-a18           | 1034.0278                                       | 1034.0307                                      | >99                   |

EM = Exact Mass. See main text for methods.

**Table S-4.** MS and HPLC data for 21-CSP and 18-CSP multiple mutation analogs.

| <b>Compound Name</b>      | <b>Calc. EM<br/>MH<sub>2</sub><sup>2+</sup></b> | <b>Obs. EM<br/>MH<sub>2</sub><sup>2+</sup></b> | <b>Purity<br/>(%)</b> |
|---------------------------|-------------------------------------------------|------------------------------------------------|-----------------------|
| 18-CSP-S3T                | 1041.0356                                       | 1041.0364                                      | >97                   |
| 21-CSP-S3T                | 1190.1358                                       | 1190.1328                                      | >99                   |
| 18-CSP-s1s3l4             | 1034.0278                                       | 1034.0262                                      | >99                   |
| 18-CSP-s1s3l4L10AR13AS14A | 962.4746                                        | 962.4786                                       | >96                   |
| 18-CSP-S1AL10AR13AS14A    | 954.4774                                        | 954.4801                                       | >98                   |

EM = Exact Mass. See main text for methods.

## Primary reporter gene assay data

### *S. mutans* SAB249 (pCipB::lacZ)

Agonism assays were performed at 10  $\mu$ M concentration. 21-CSP was used as the positive control (100%) with DMSO as the negative control (0%). Percent (%) ComD activation was measured by normalizing the miller units obtained for each peptide to that of 21-CSP. All peptides were screened in triplicates over three separate trials. Error bars indicate standard error of the mean of nine values.

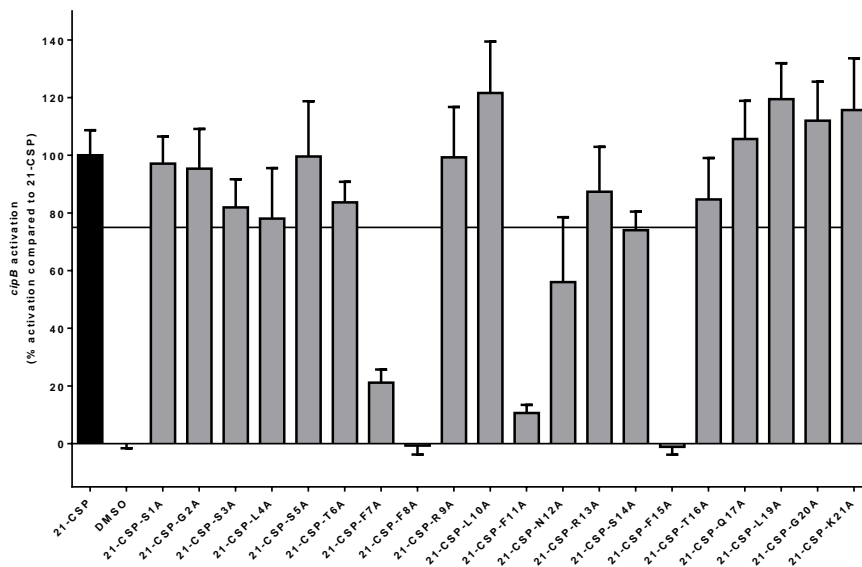

**Figure S-1.** Primary agonism screening assay data for the 21-CSP alanine scan library. Peptides that exhibited over 75% activation were further evaluated to determine their  $EC_{50}$  while peptides that exhibited less than 50% activation were evaluated as potential competitive inhibitors.

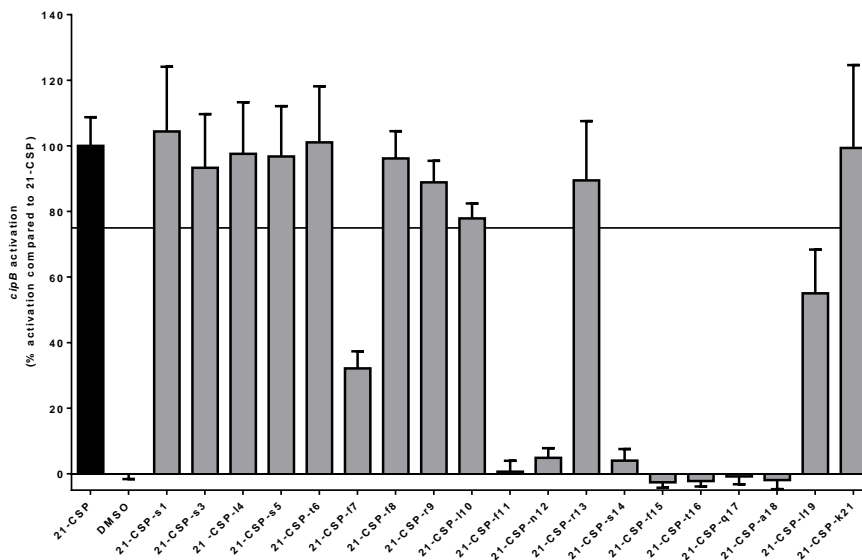

**Figure S-2.** Primary agonism screening assay data for the 21-CSP D-amino acid scan library. Peptides that exhibited over 75% activation were further evaluated to determine their  $EC_{50}$  while peptides that exhibited less than 50% activation were evaluated as potential competitive inhibitors.

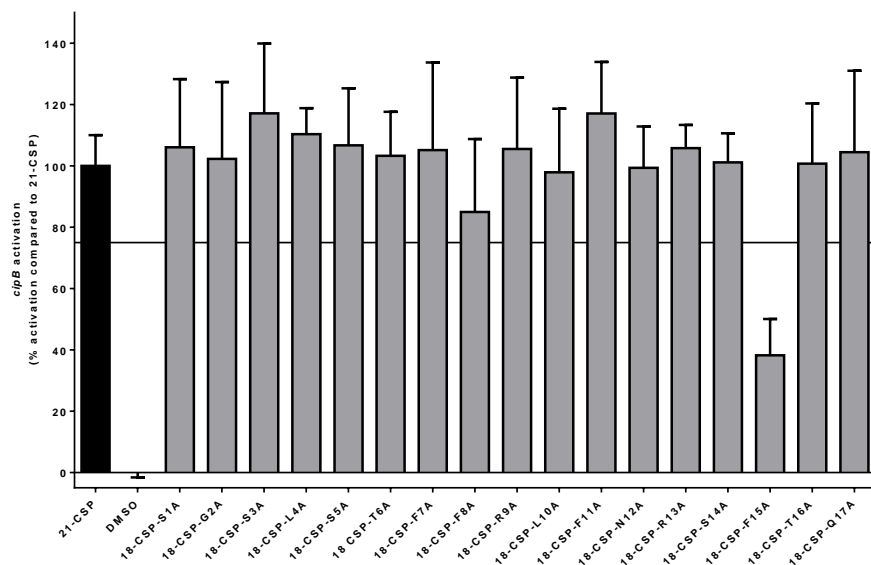

**Figure S-3.** Primary agonism screening assay data for the 18-CSP alanine scan library. Peptides that exhibited over 75% activation were further evaluated to determine their EC<sub>50</sub> while peptides that exhibited less than 50% activation were evaluated as potential competitive inhibitors.

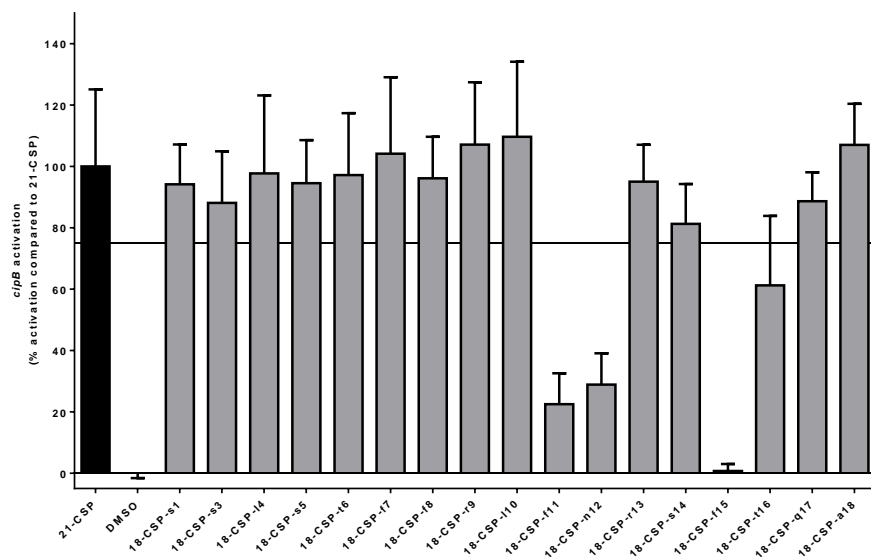

**Figure S-4.** Primary agonism screening assay data for the 18-CSP D-amino acid scan library. Peptides that exhibited over 75% activation were further evaluated to determine their EC<sub>50</sub> while peptides that exhibited less than 50% activation were evaluated as potential competitive inhibitors.

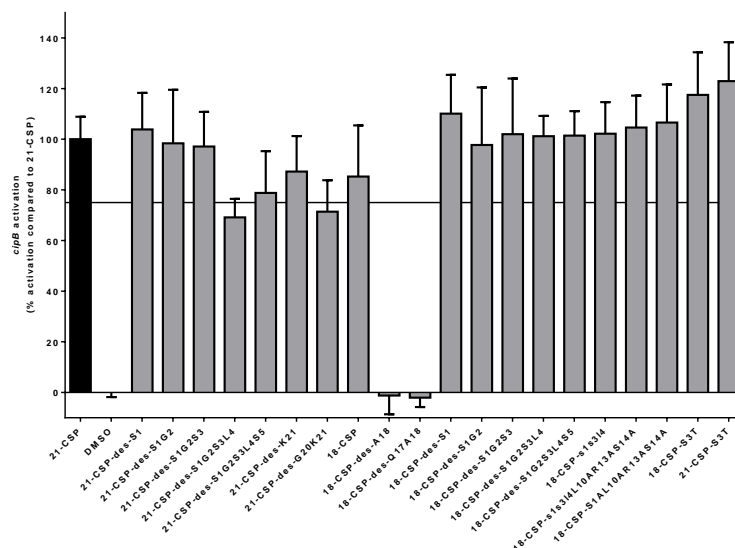

**Figure S-5.** Primary agonism screening assay data for the 21-CSP & 18-CSP truncated peptides and second-generation peptide analogs. Peptides that exhibited over 75% activation were further evaluated to determine their EC<sub>50</sub> while peptides that exhibited less than 50% activation were evaluated as potential competitive inhibitors.

Antagonism assays were performed at 10 μM concentration of peptides against 1000 nM concentration of 21-CSP. 21-CSP (1000 nM) was used as the positive control (100%) with DMSO as the negative control (0%). Percent (%) ComD activation was measured by normalizing the miller units obtained for each peptide to that of 21-CSP. All peptides were screened in triplicates over three separate trials. Error bars indicate standard error of the mean of nine values.

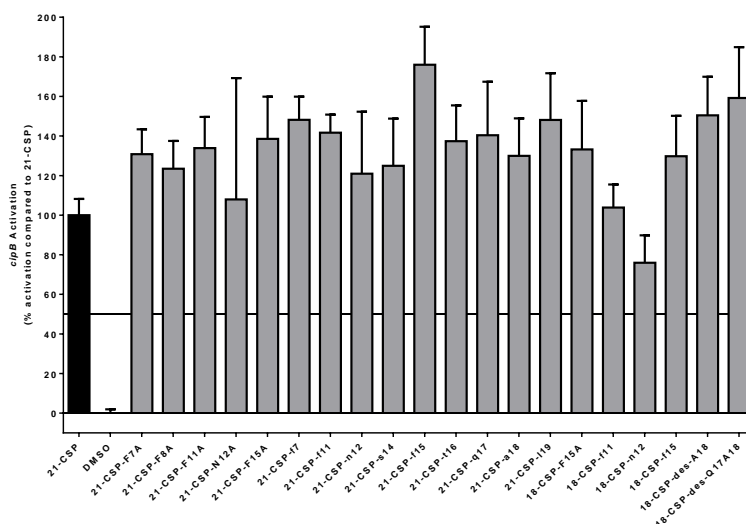

**Figure S-6.** Primary antagonism screening assay data for the 21-CSP and 18-CSP alanine, D-amino acid scan libraries and truncated peptides.



***S. mutans* SMCOM2 ( $\Delta comC$ ,  $pcomX::lacZ$ )**

Agonism assays were performed at 10  $\mu$ M concentration. 21-CSP was used as the positive control (100%) with DMSO as the negative control (0%). Percent (%) ComD activation was measured by normalizing the miller units obtained for each peptide to that of 21-CSP. All peptides were screened in triplicates over three separate trials. Error bars indicate standard error of the mean of nine values.

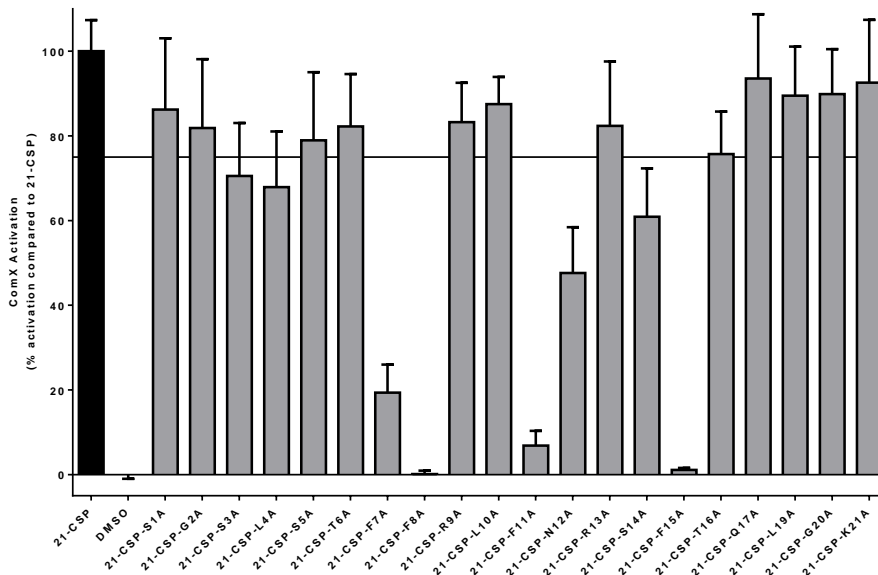

**Figure S-7.** Primary agonism screening assay data for the 21-CSP alanine scan library. Peptides that exhibited over 75% activation were further evaluated to determine their EC<sub>50</sub> while peptides that exhibited less than 50% activation were evaluated as potential competitive inhibitors.

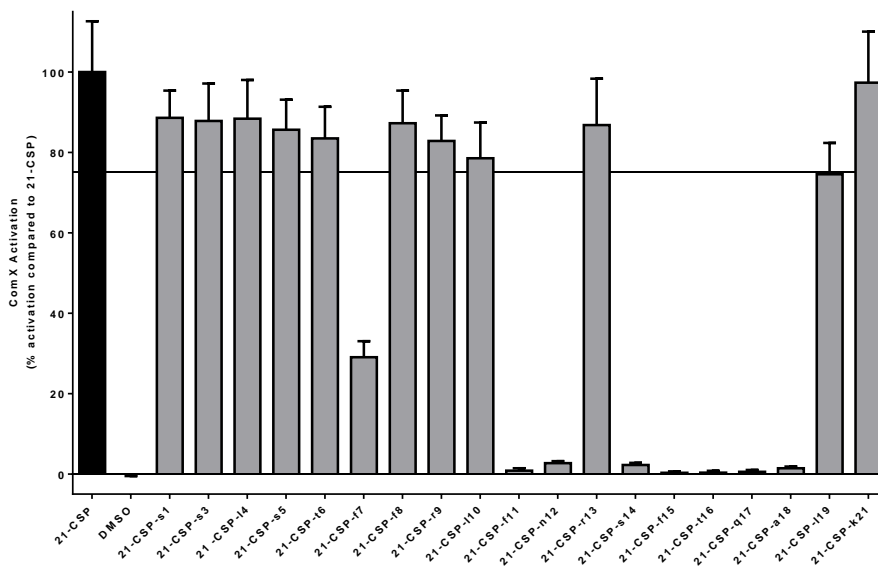

**Figure S-8.** Primary agonism screening assay data for the 21-CSP D-amino acid scan library. Peptides that exhibited over 75% activation were further evaluated to determine their EC<sub>50</sub> while peptides that exhibited less than 50% activation were evaluated as potential competitive inhibitors.

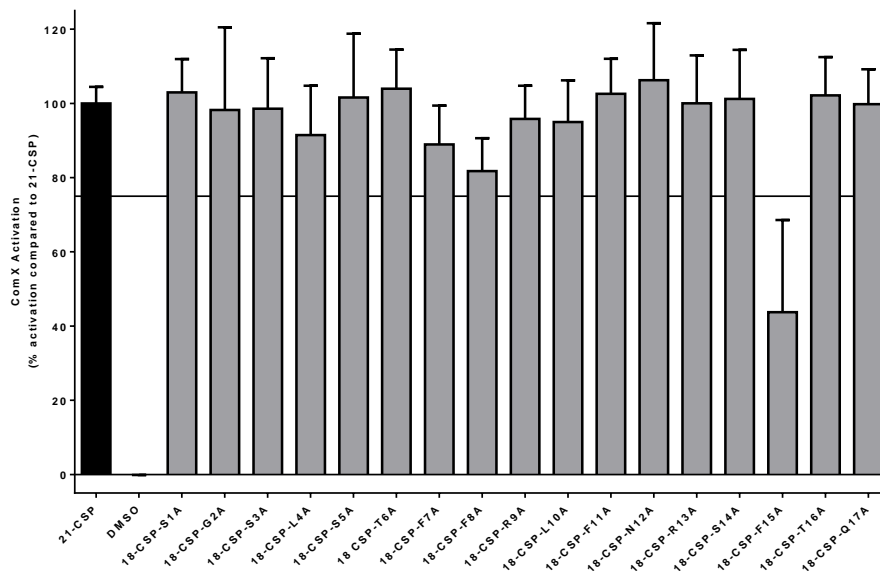

**Figure S-9.** Primary agonism screening assay data for the 18-CSP alanine scan library. Peptides that exhibited over 75% activation were further evaluated to determine their EC<sub>50</sub> while peptides that exhibited less than 50% activation were evaluated as potential competitive inhibitors.

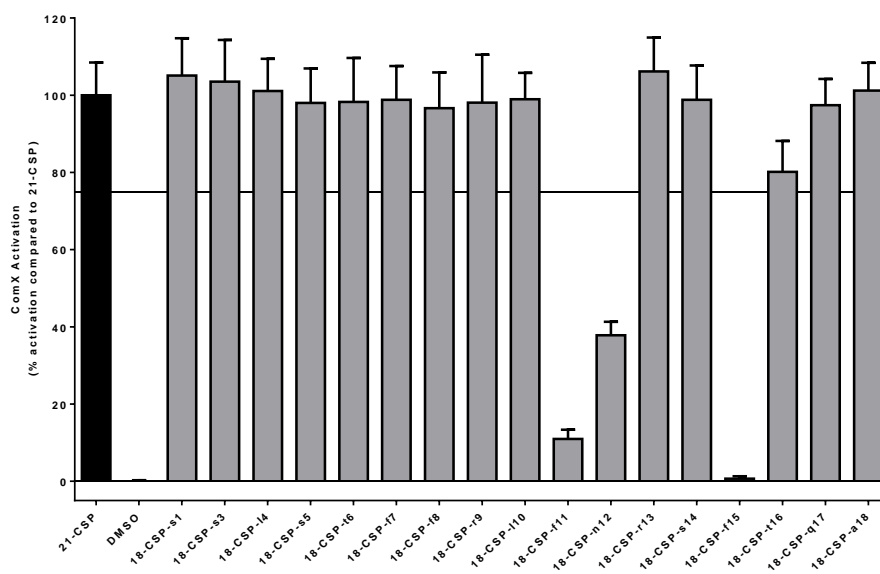

**Figure S-10.** Primary agonism screening assay data for the 18-CSP D-amino acid scan library. Peptides that exhibited over 75% activation were further evaluated to determine their EC<sub>50</sub> while peptides that exhibited less than 50% activation were evaluated as potential competitive inhibitors.

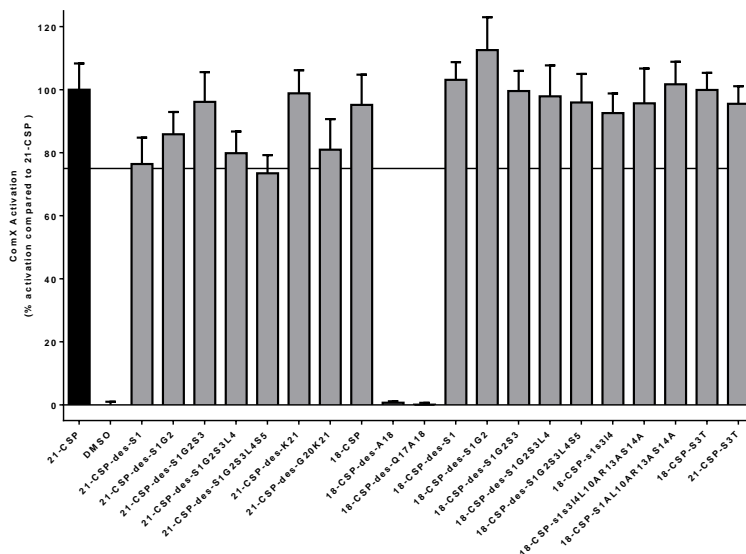

**Figure S-11.** Primary agonism screening assay data for the 21-CSP & 18-CSP truncated peptides and second-generation peptide analogs. Peptides that exhibited over 75% activation were further evaluated to determine their EC<sub>50</sub> while peptides that exhibited less than 50% activation were evaluated as potential competitive inhibitors.

Antagonism assays were performed at 10 μM concentration of peptides against 350 nM concentration of 21-CSP. 21-CSP (350 nM) was used as the positive control (100%) with DMSO as the negative control (0%). Percent (%) ComD activation was measured by normalizing the miller units obtained for each peptide to that of 21-CSP. All peptides were screened in triplicates over three separate trials. Error bars indicate standard error of the mean of nine values.

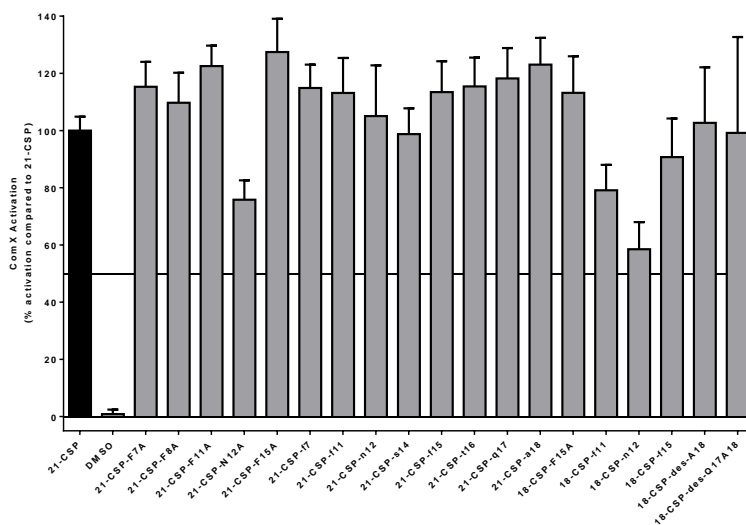

**Figure S-12.** Primary antagonism screening assay data for the 21-CSP and 18-CSP alanine, D-amino acid scan libraries and truncated peptides.

## Agonism dose response curves

Both the 21-CSP and 18-CSP analogs were screened over varying concentrations in the two indicated *S. mutans* beta-galactosidase reporter strains (SAB249 and SMCOM2). Each dose response experiment was performed in triplicate on three separate occasions (i.e., experiments (Exp.) #1-3; shown for each peptide below). Error bars indicate standard error of the mean of triplicate values. In each plot the peptide as well as its EC<sub>50</sub> value and 95% confidence interval values (95% CI) are indicated at top left.

### *S. mutans* SAB249 (pCipB::lacZ)

#### Activation dose response curves (21-CSP)

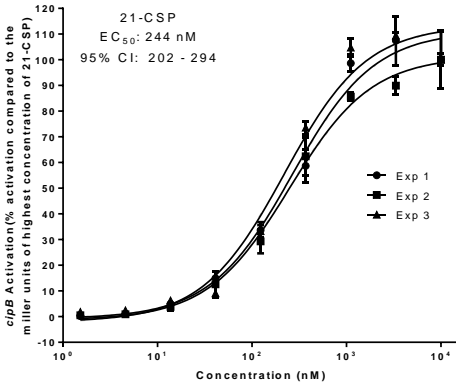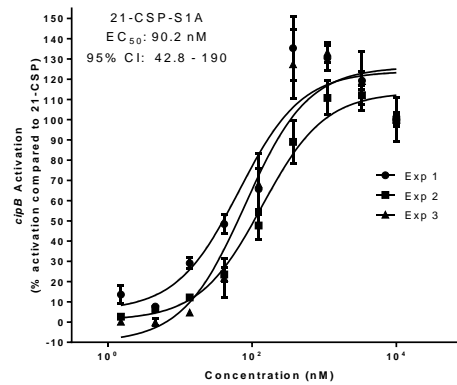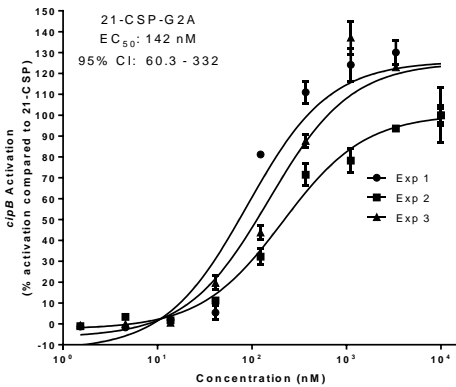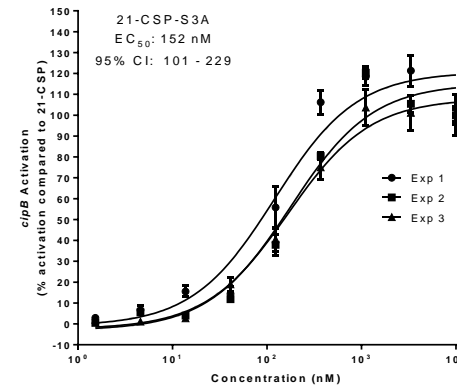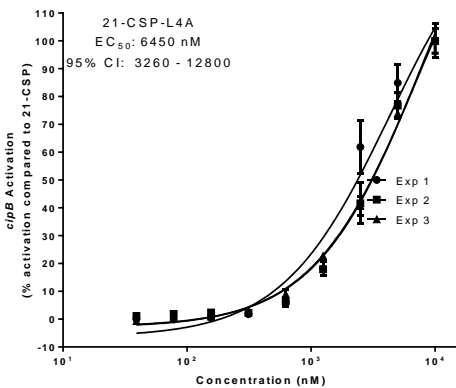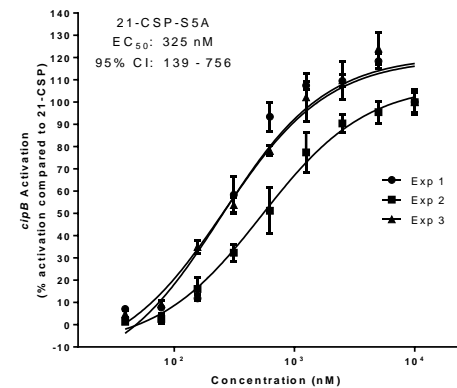

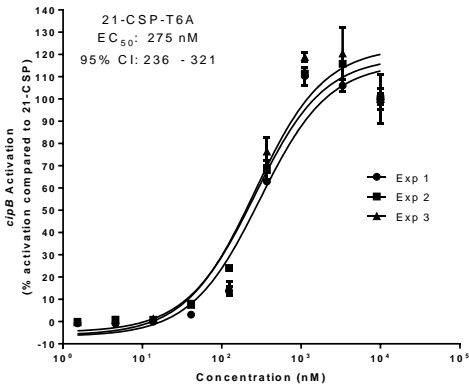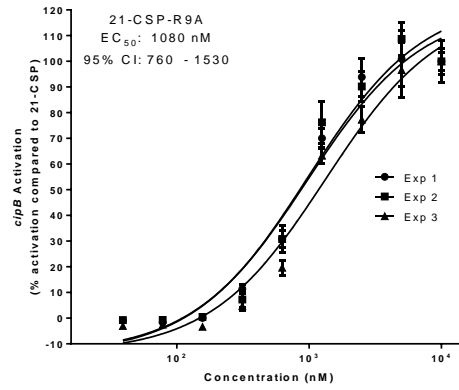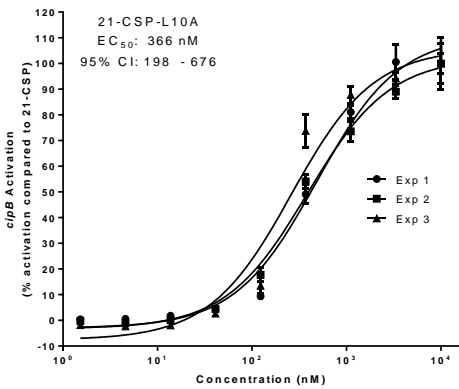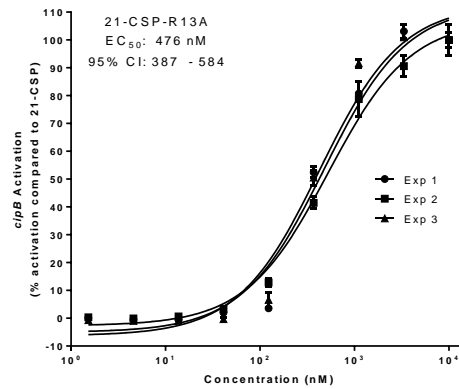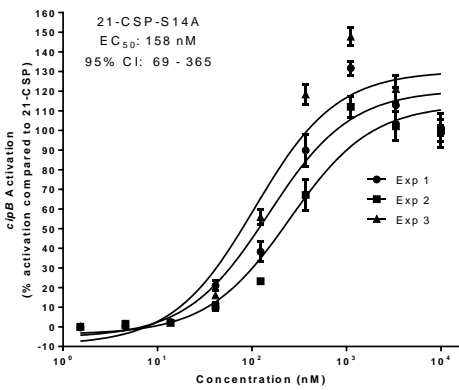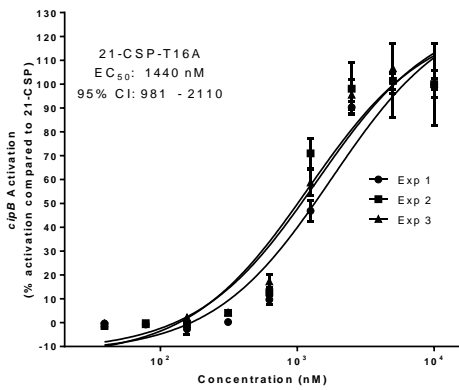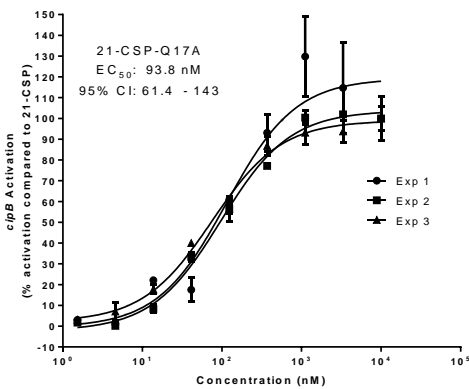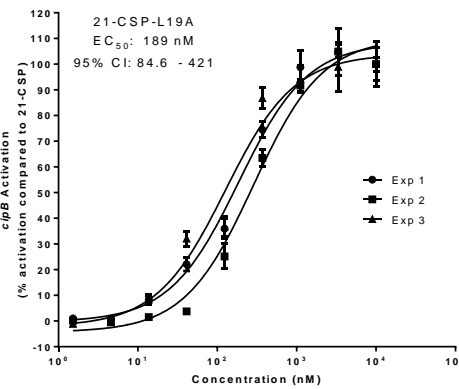

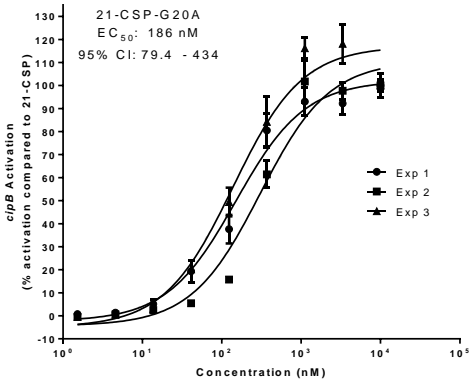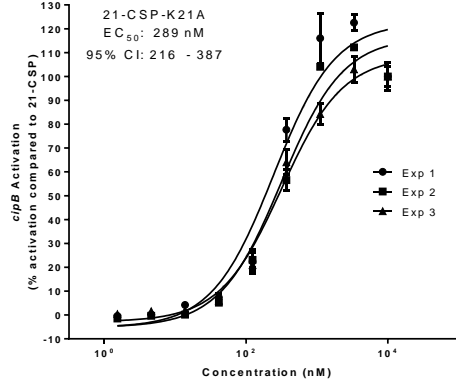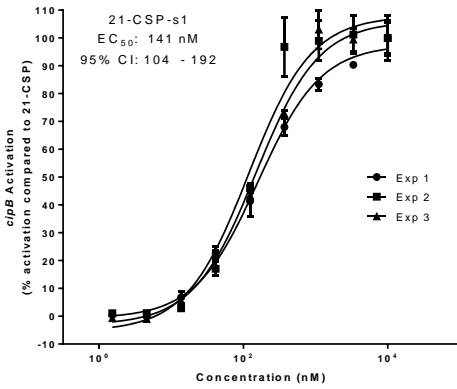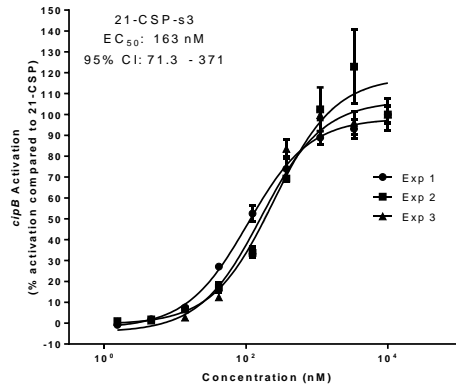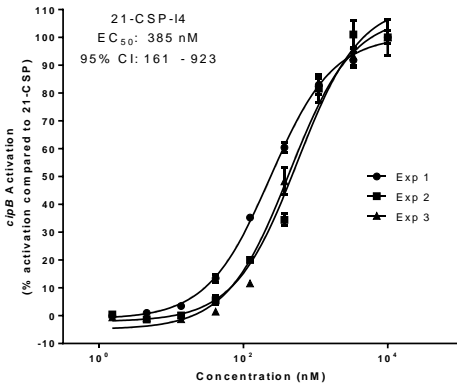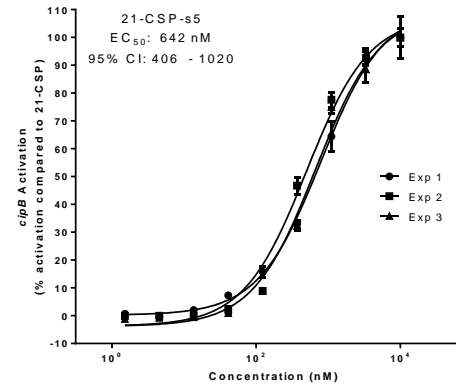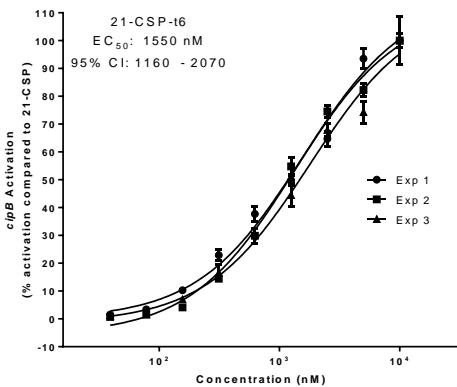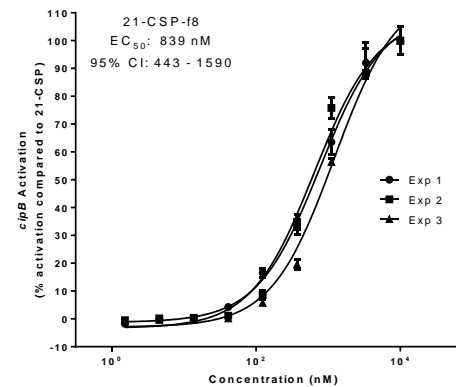

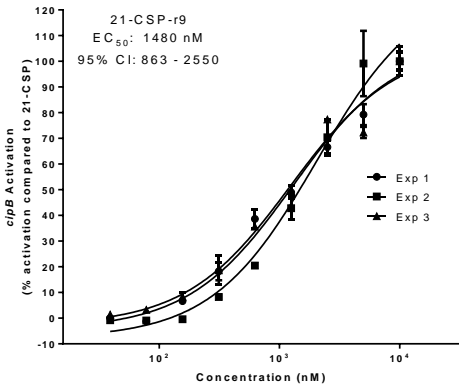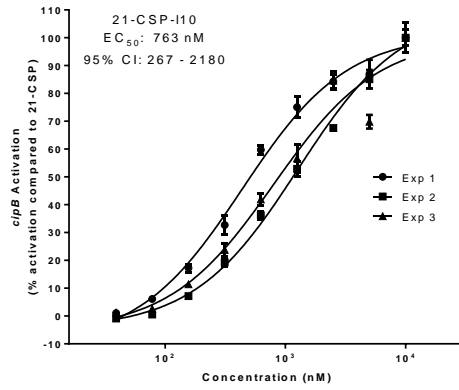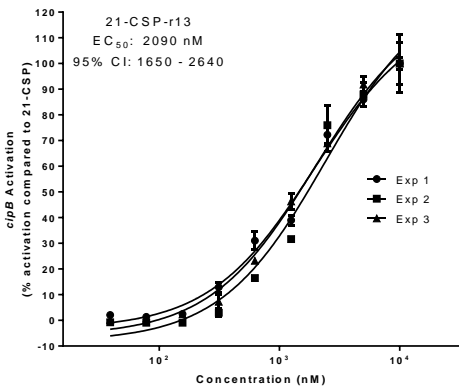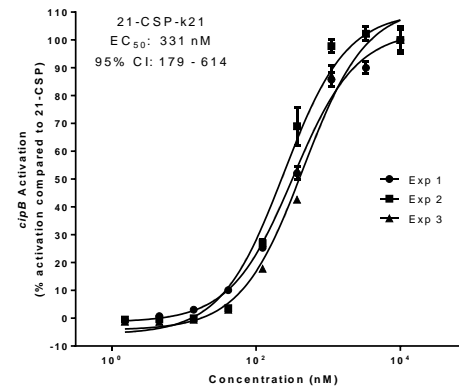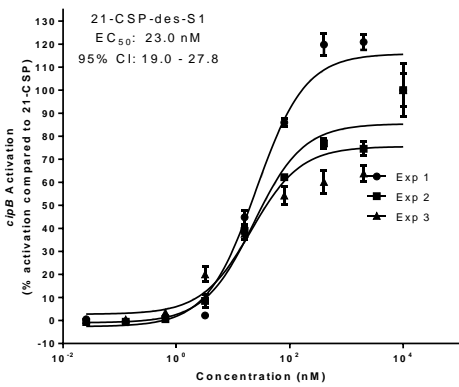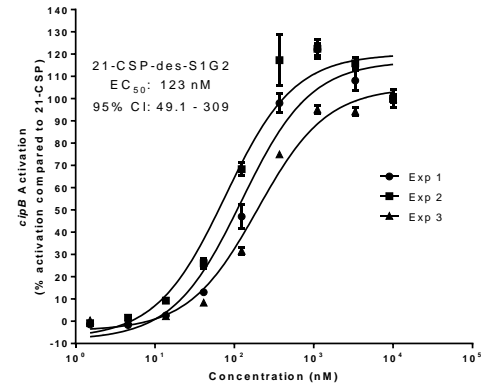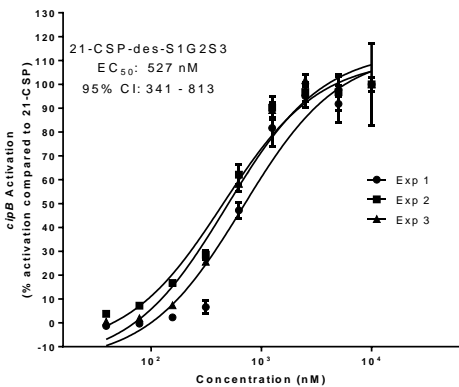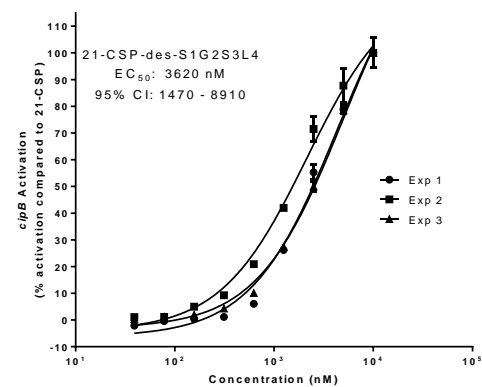

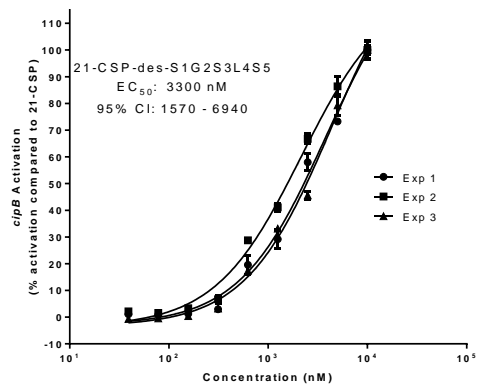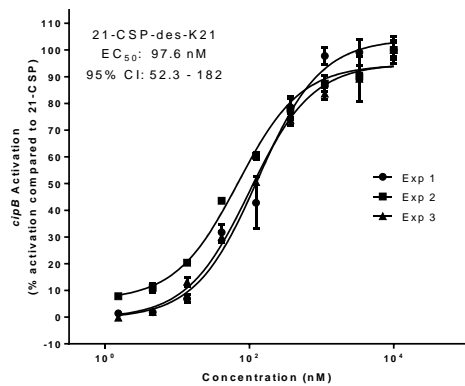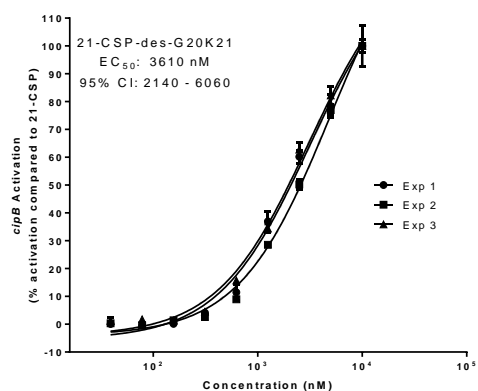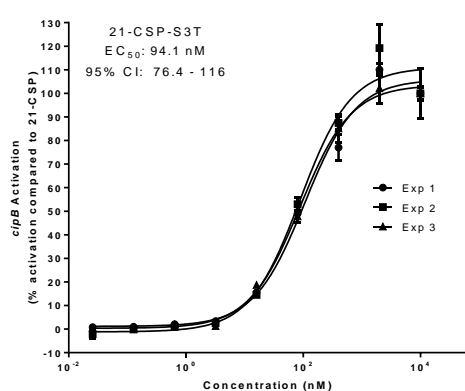



***S. mutans* SAB249 (pCipB::lacZ)**  
 Activation dose response curves (18-CSP)

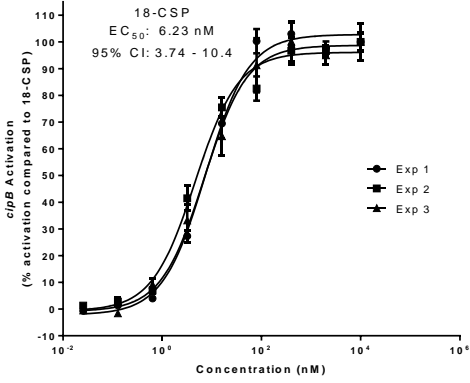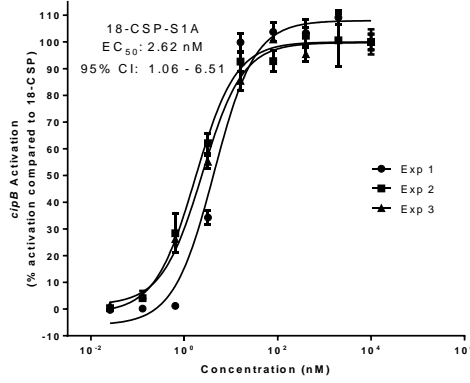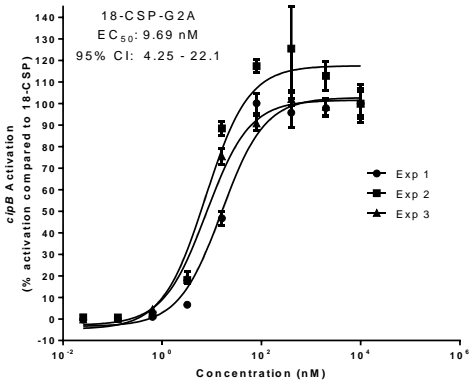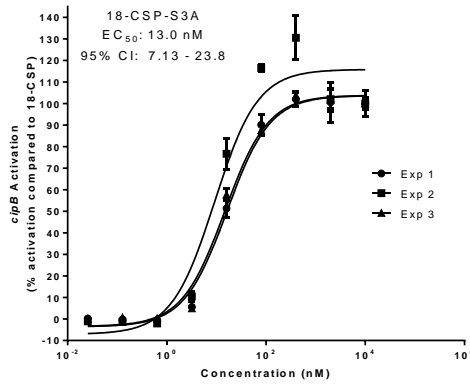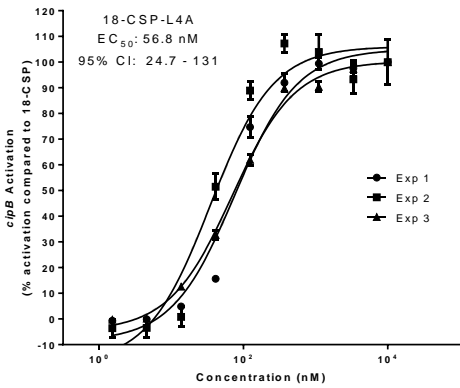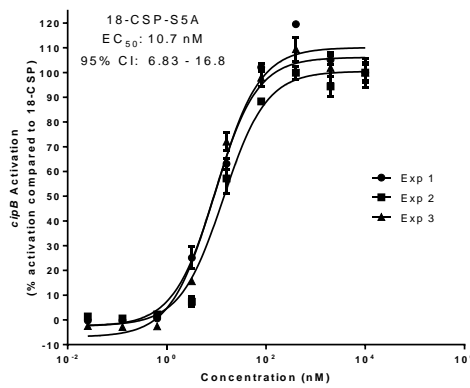

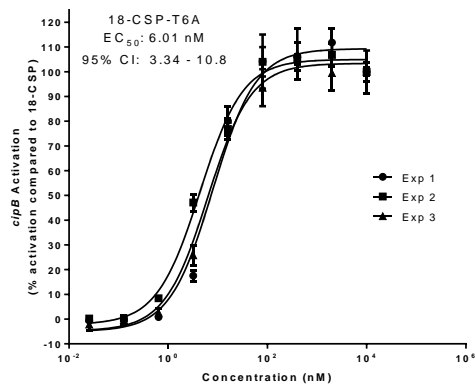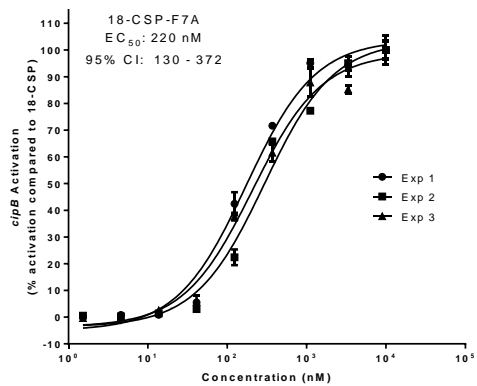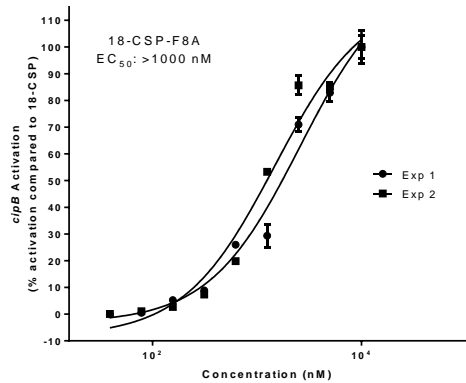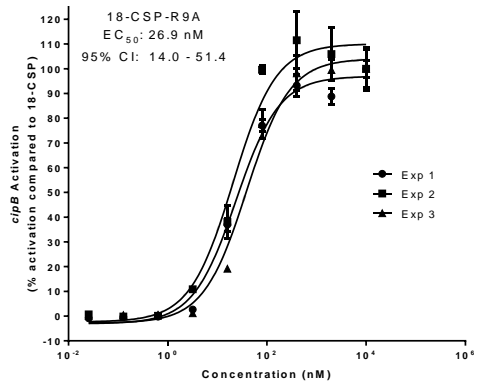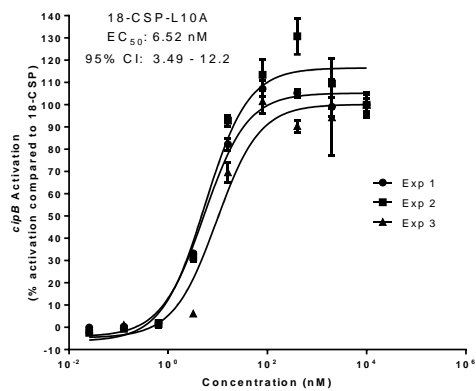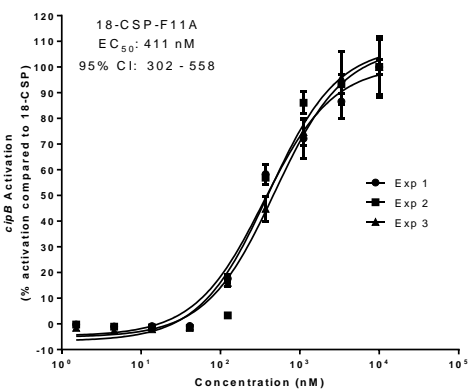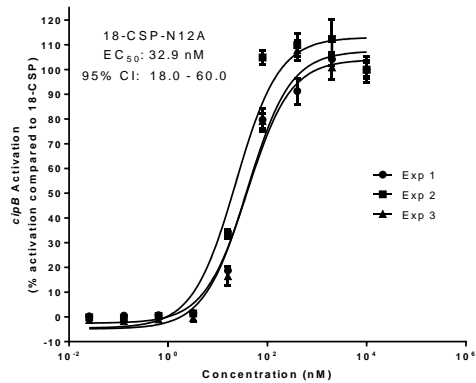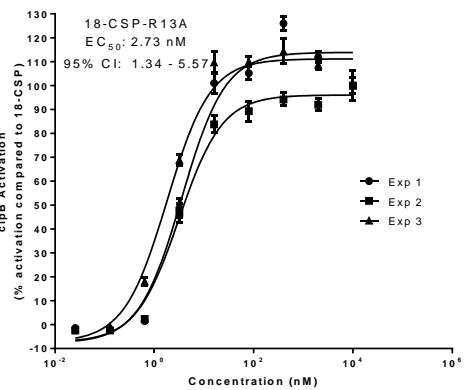

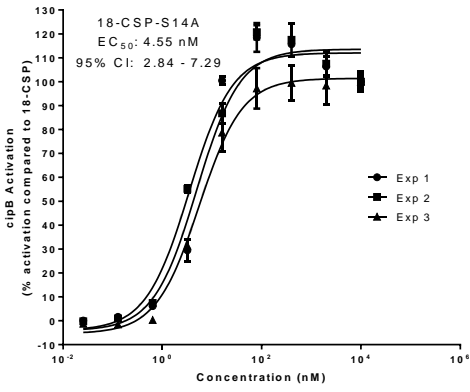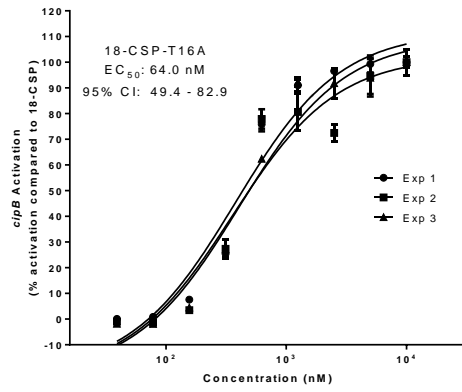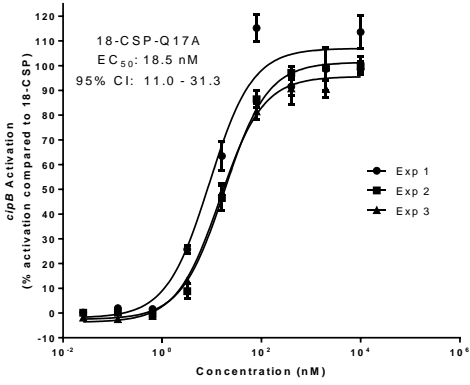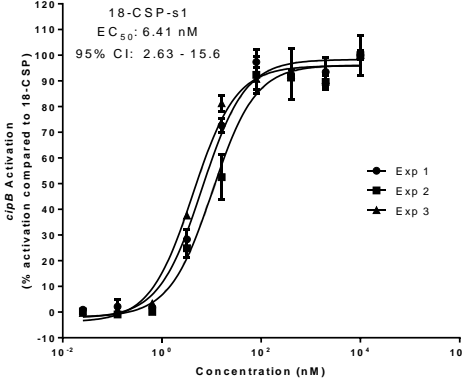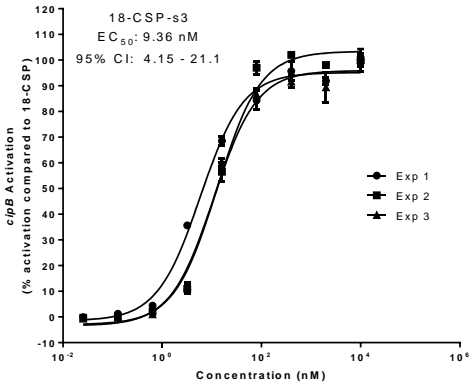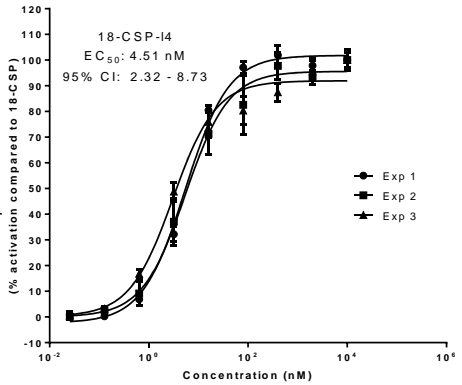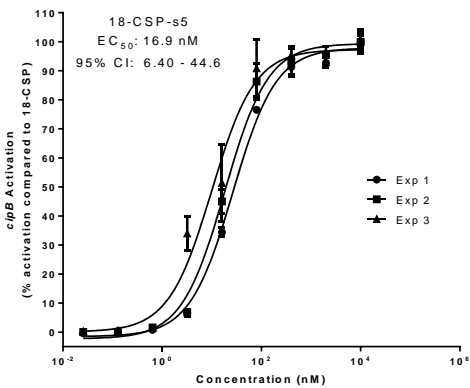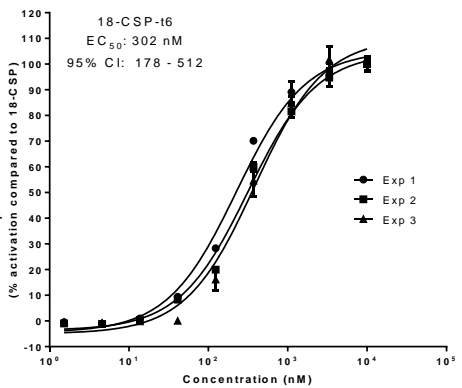

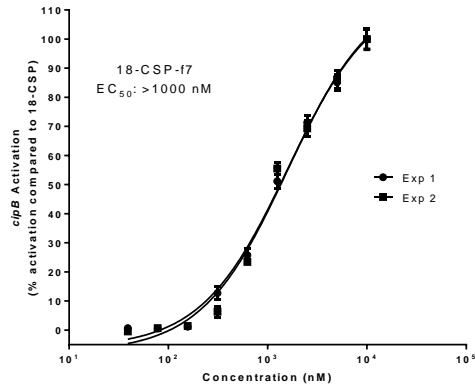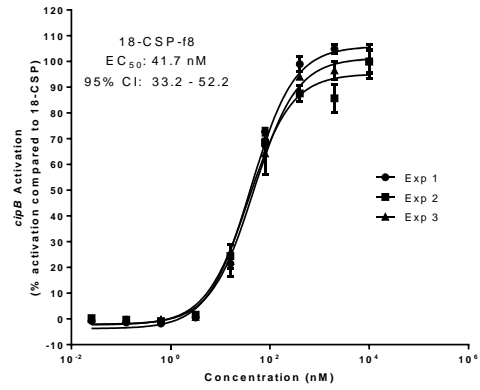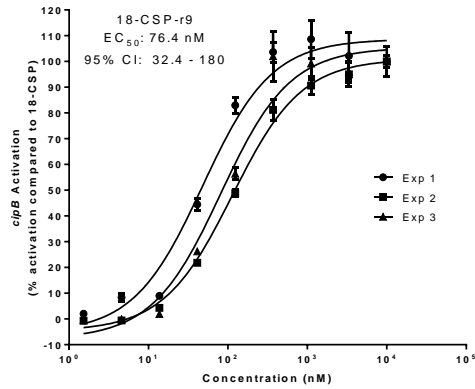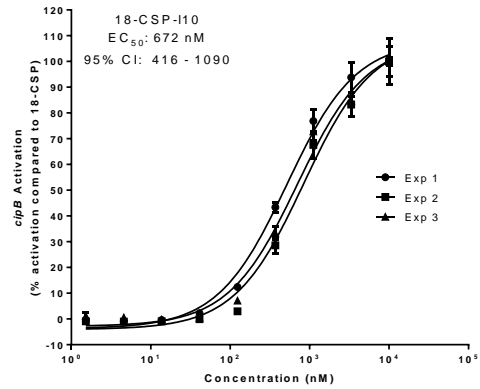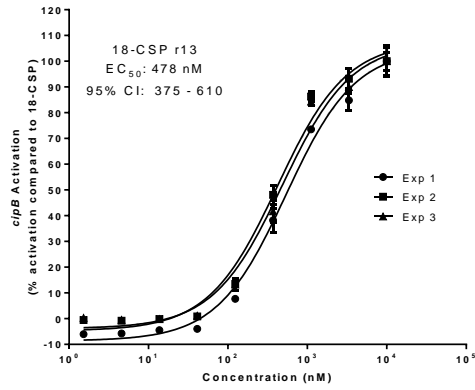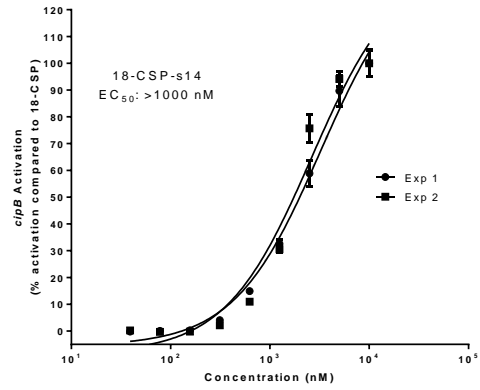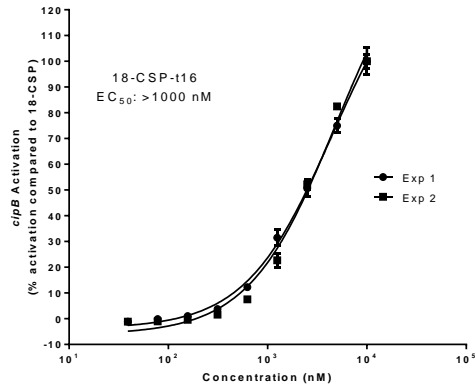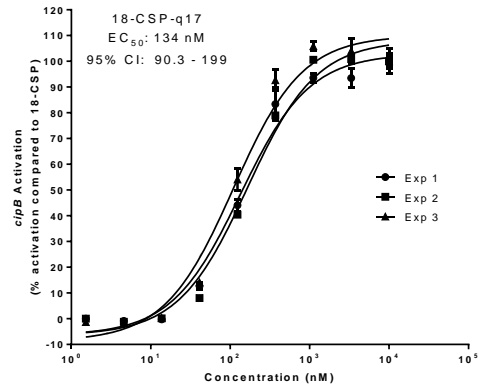

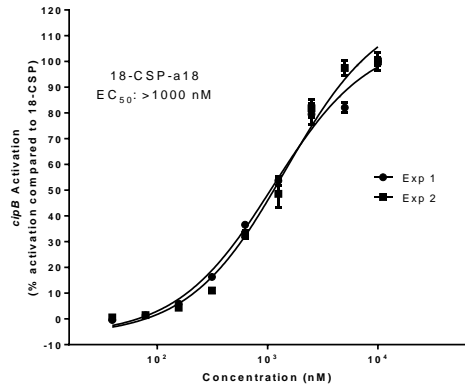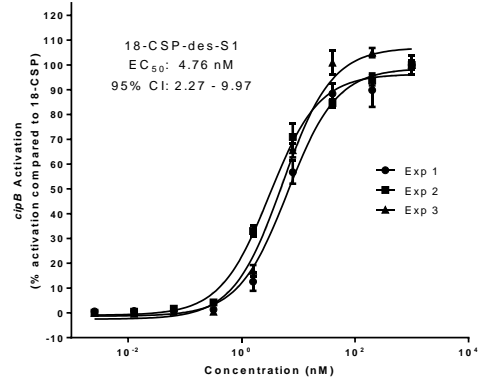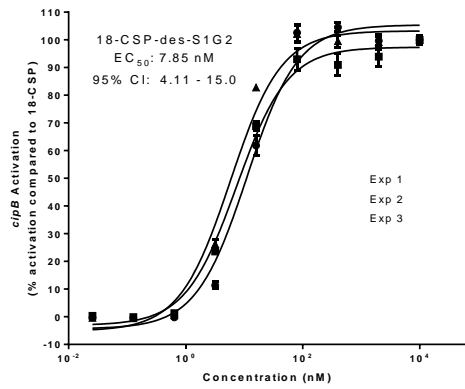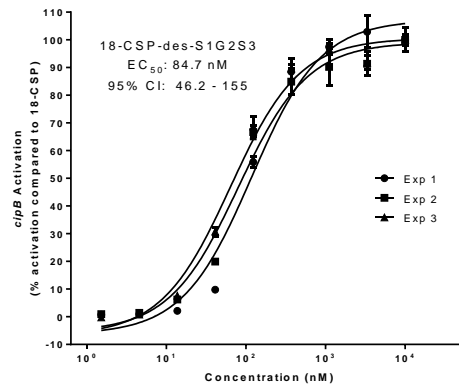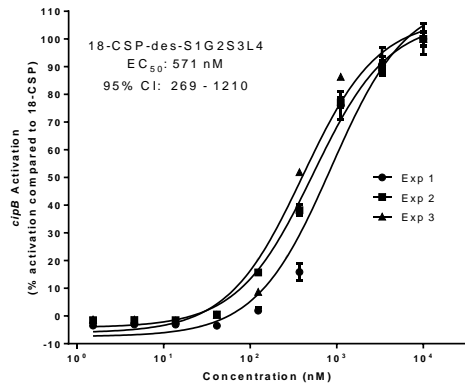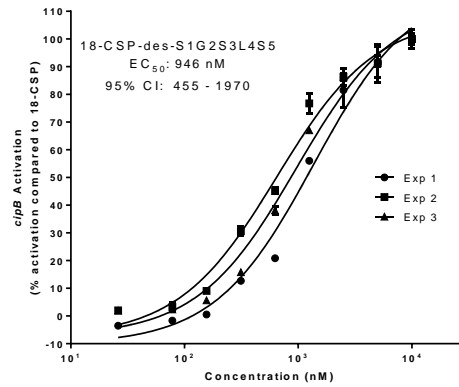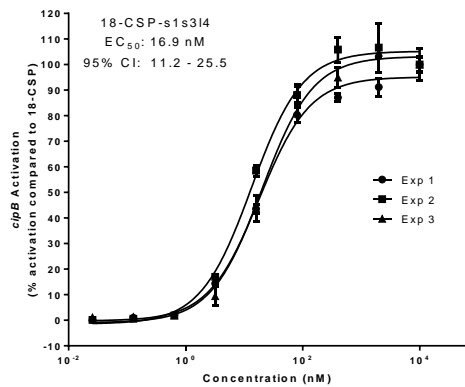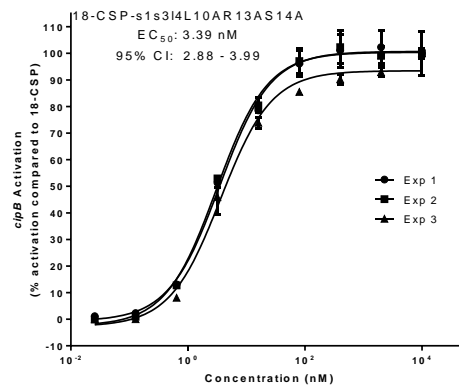

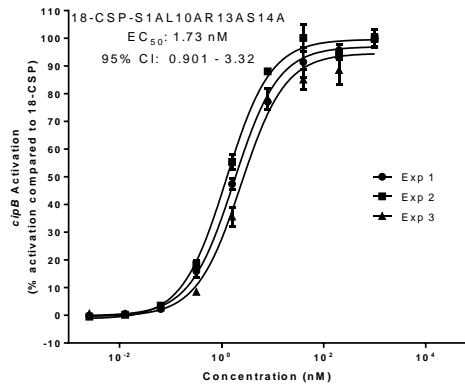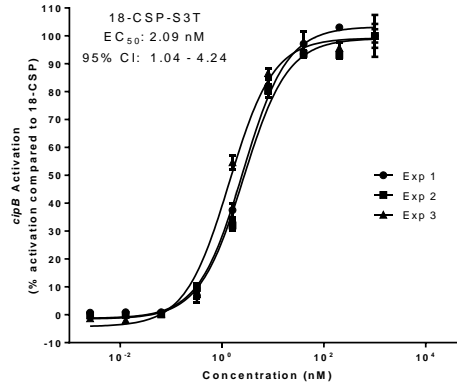

***S. mutans* SMCOM2 ( $\Delta comC$ ,  $pcomX::lacZ$ )**  
 Activation dose response curves (21-CSP)

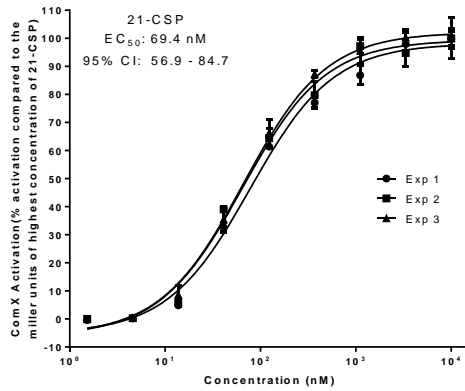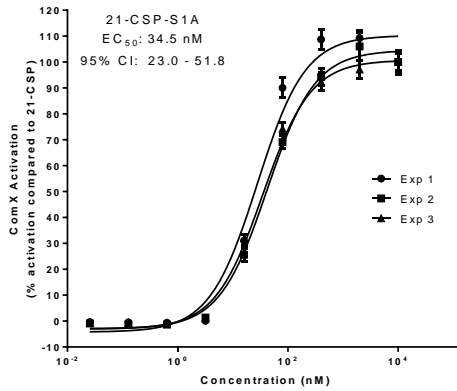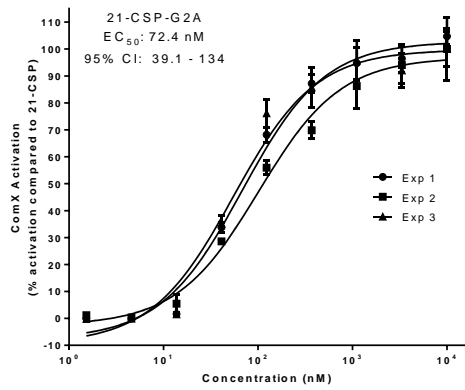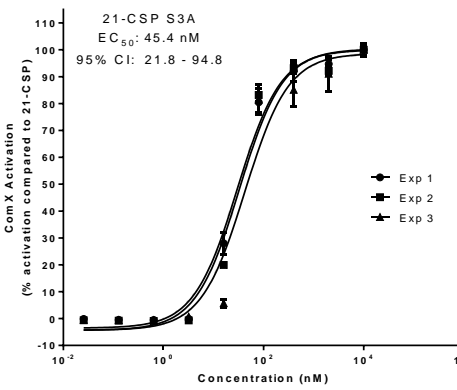

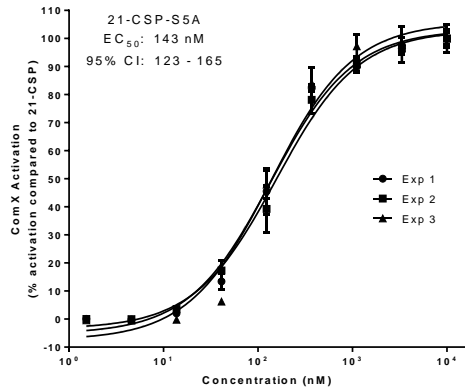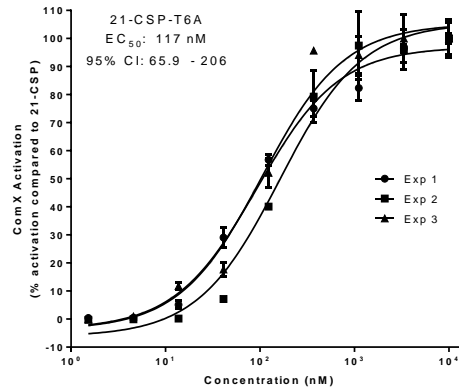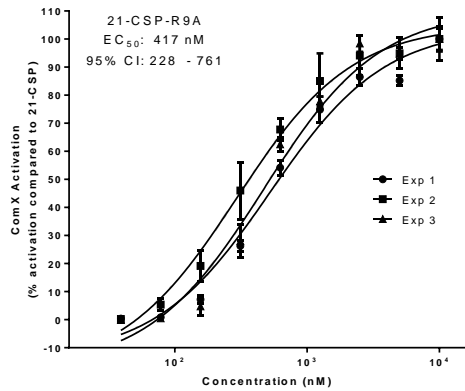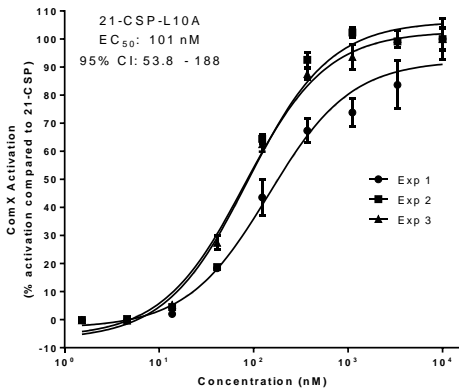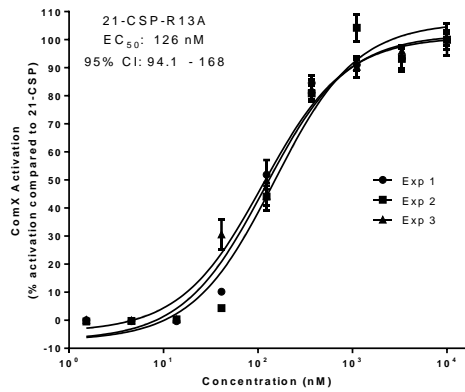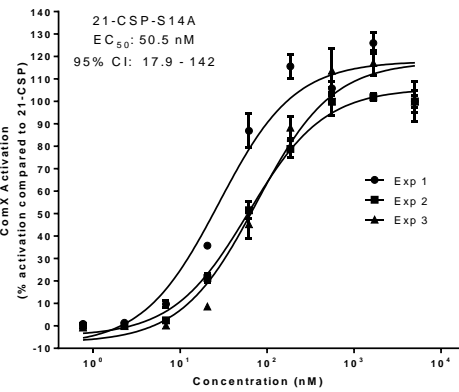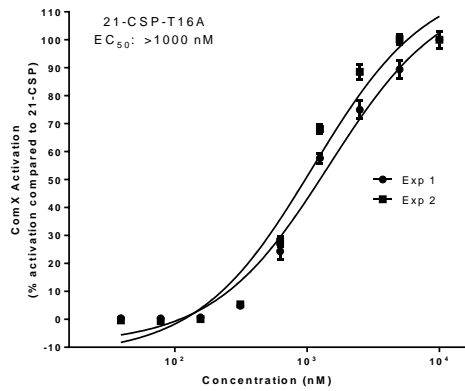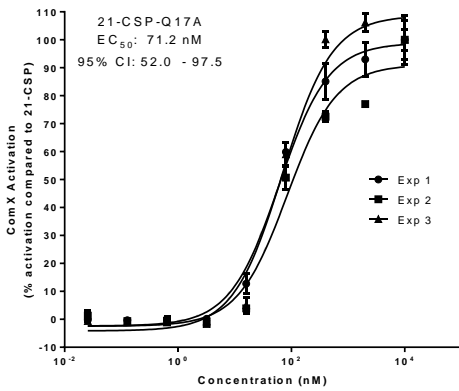

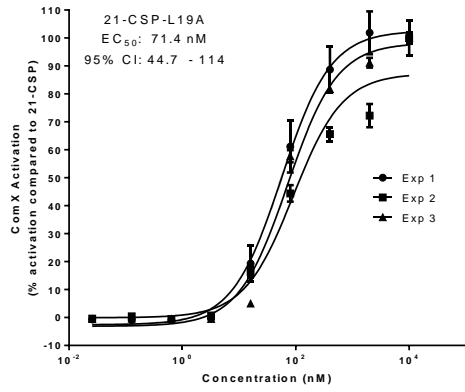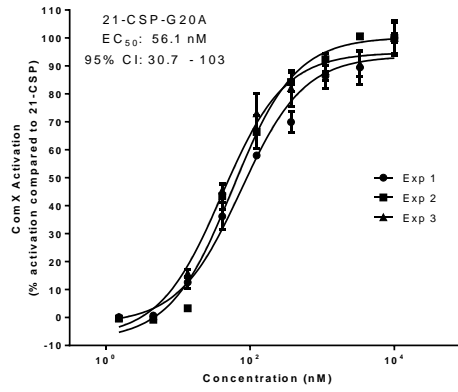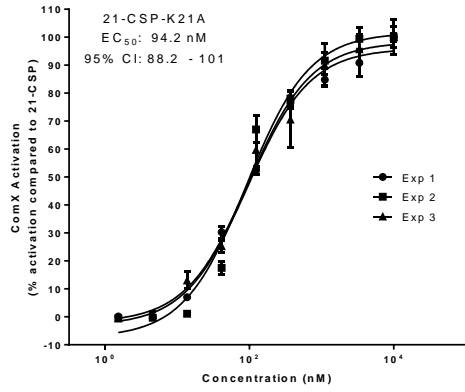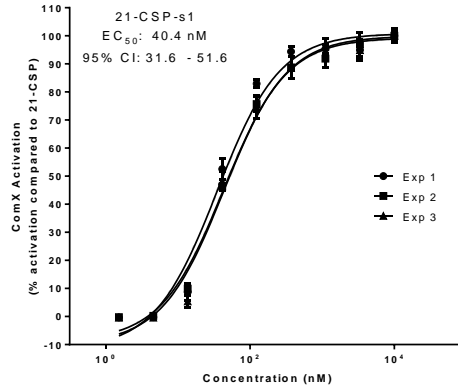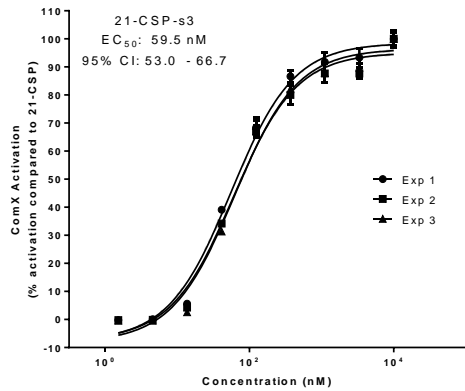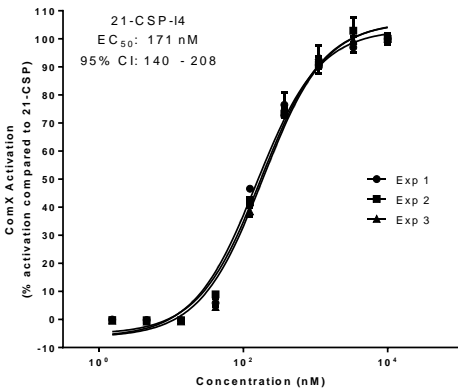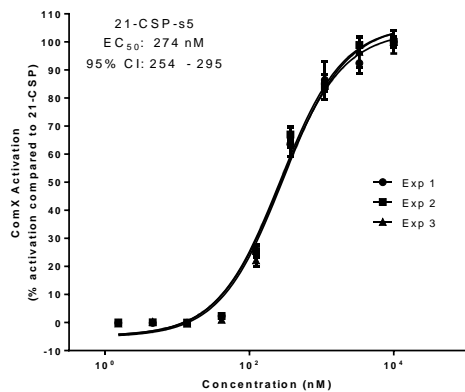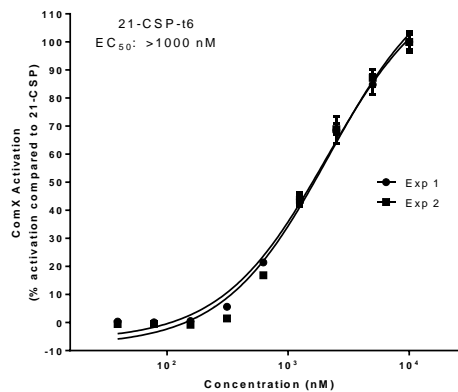



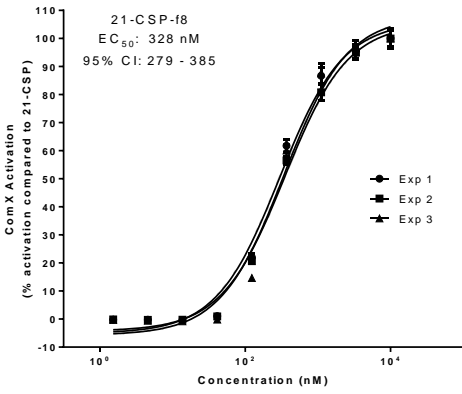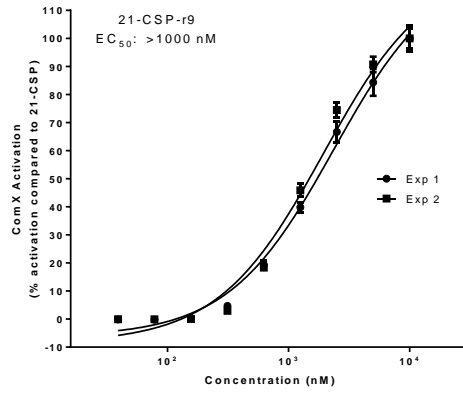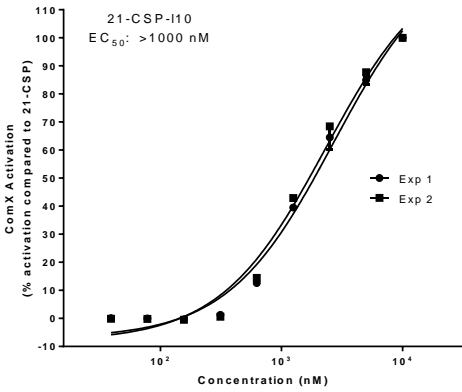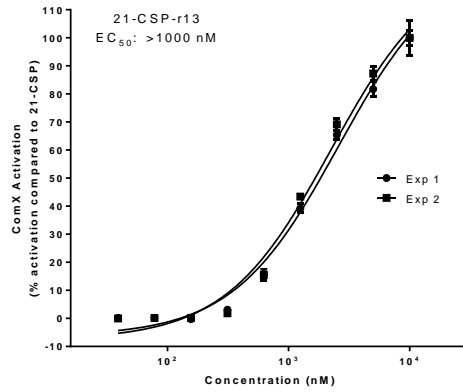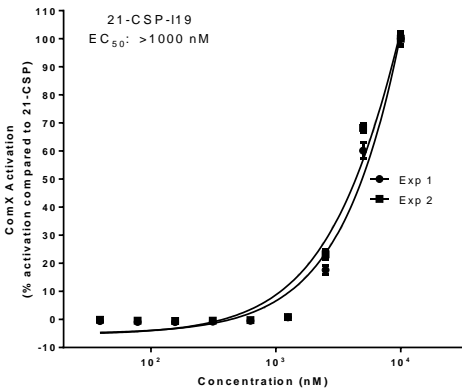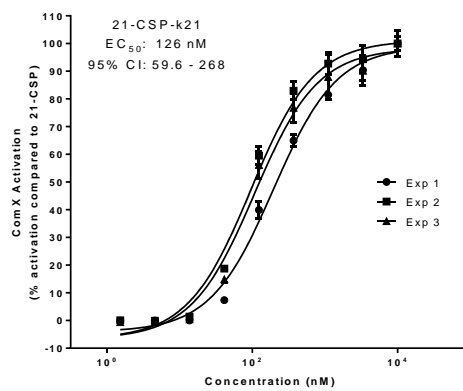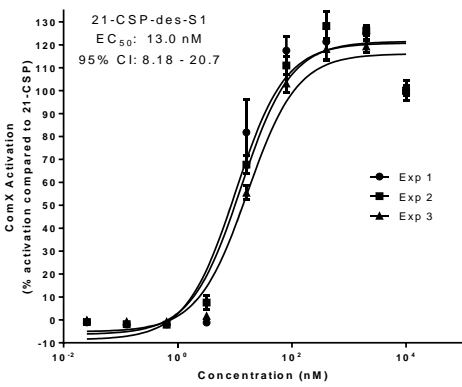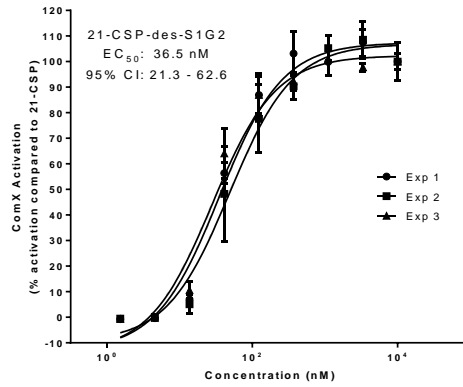

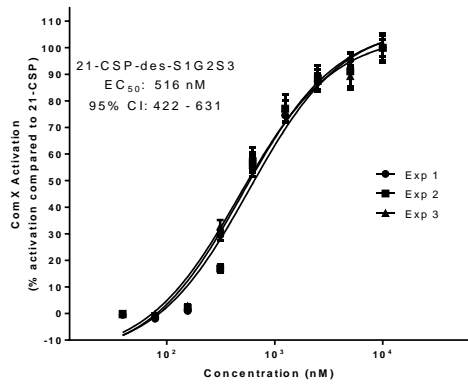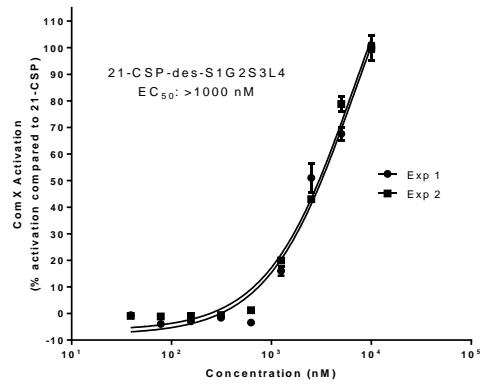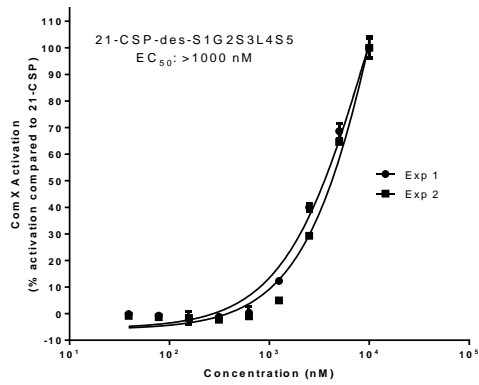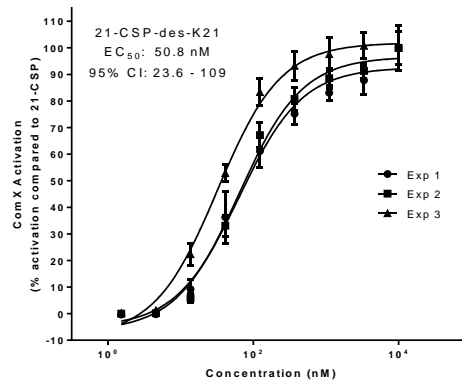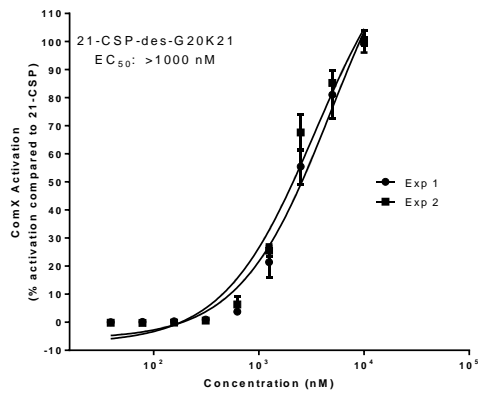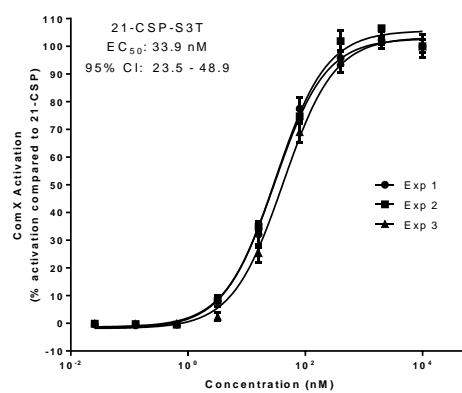

*S. mutans* SMCOM2 ( $\Delta comC$ ,  $pcomX::lacZ$ )  
 Activation dose response curves (18-CSP)

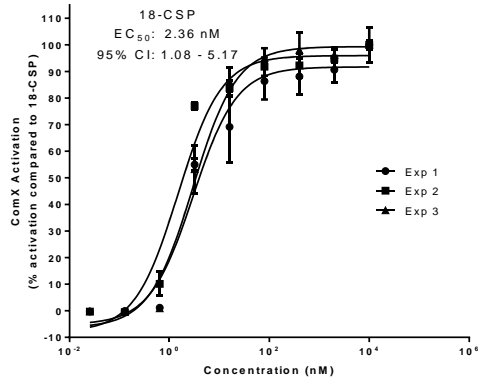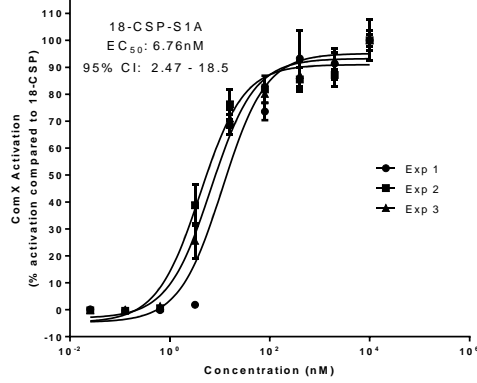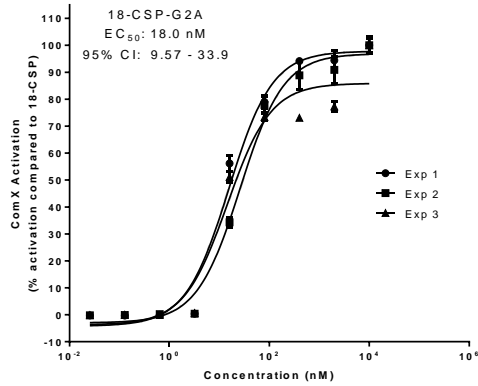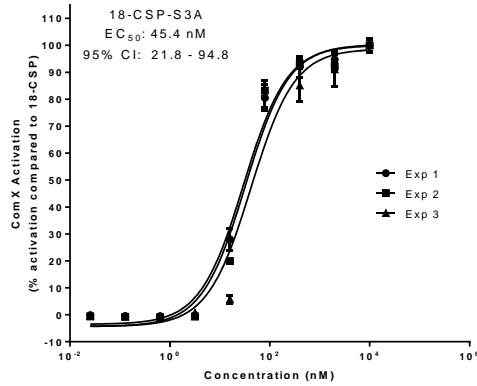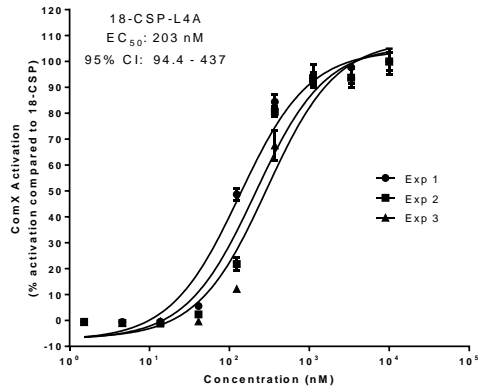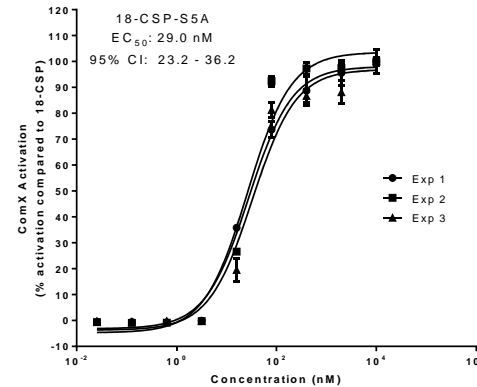

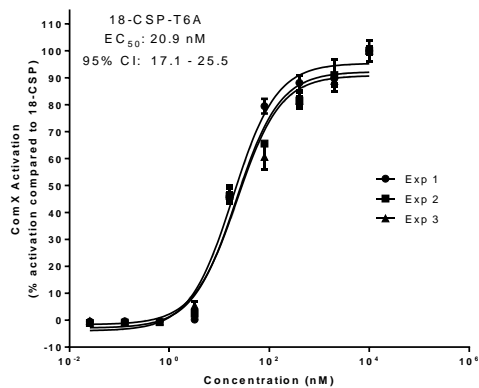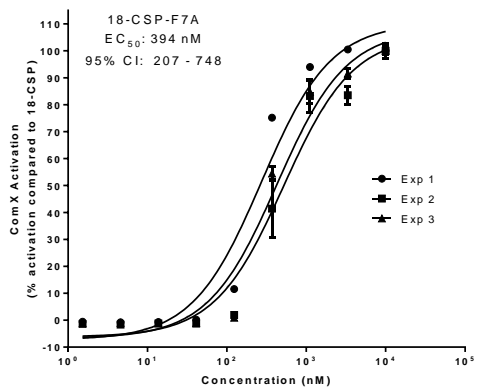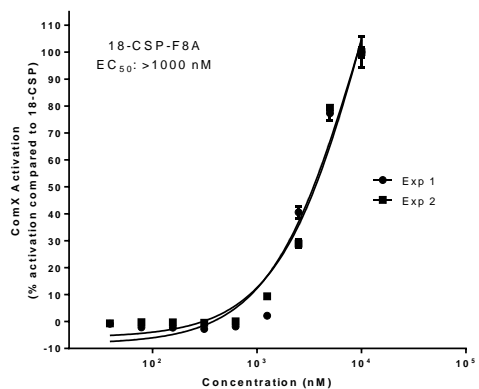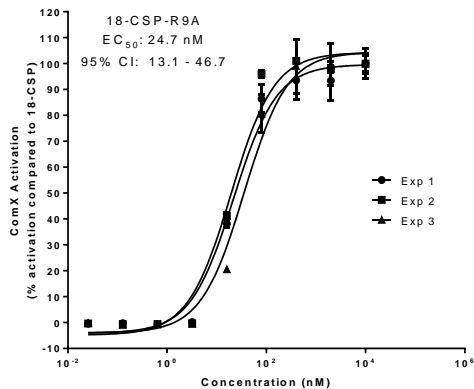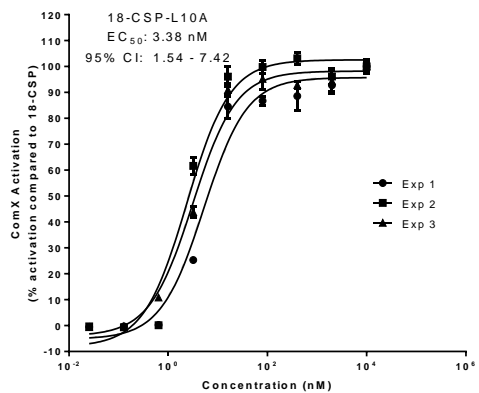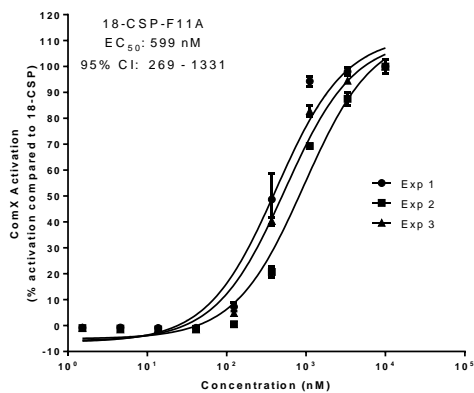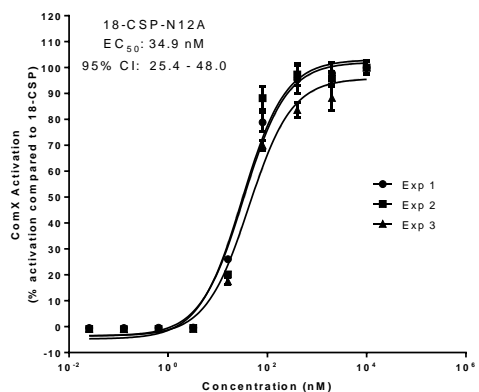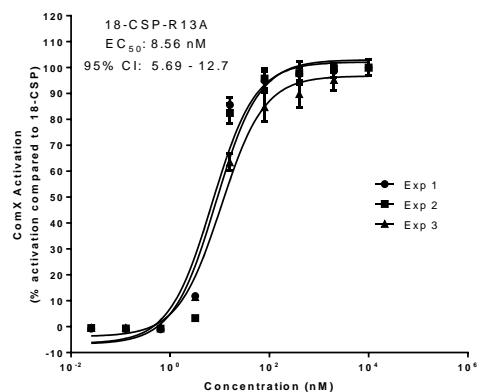

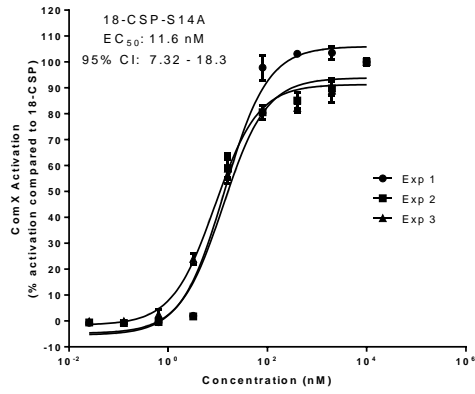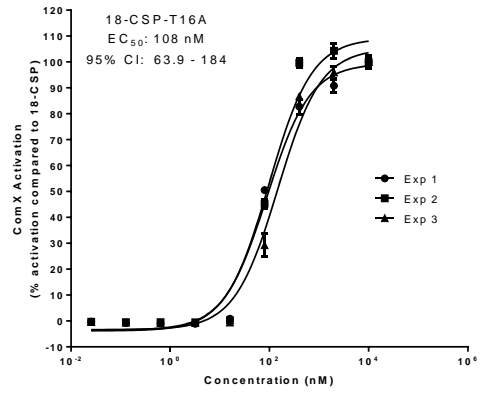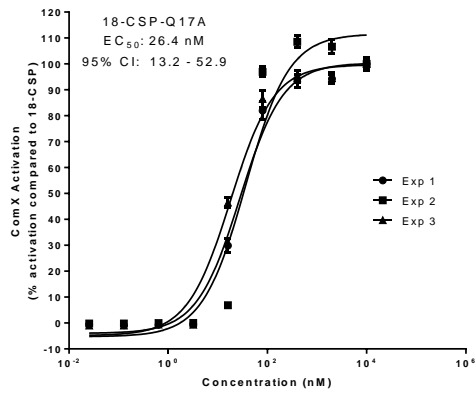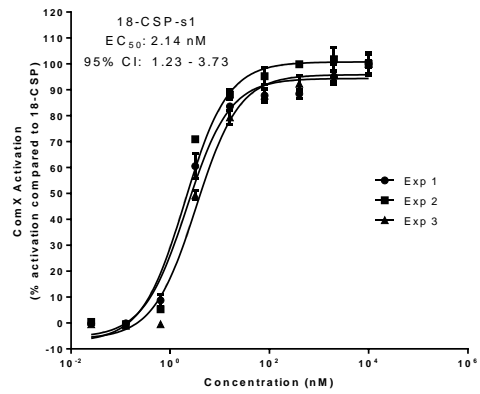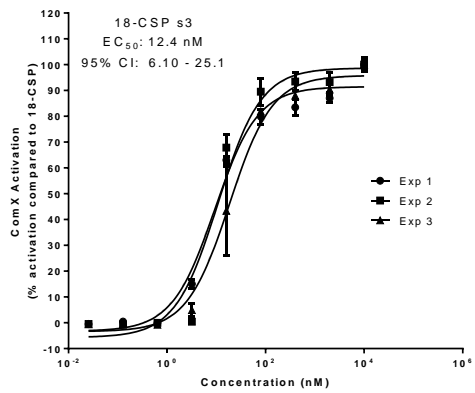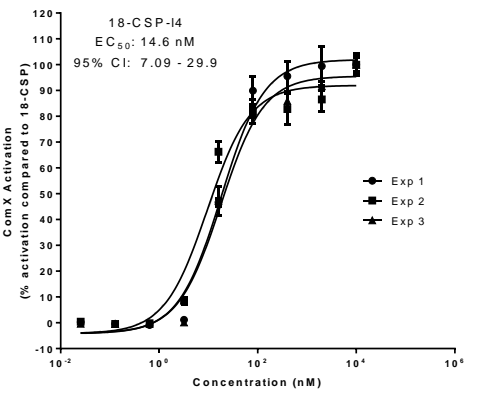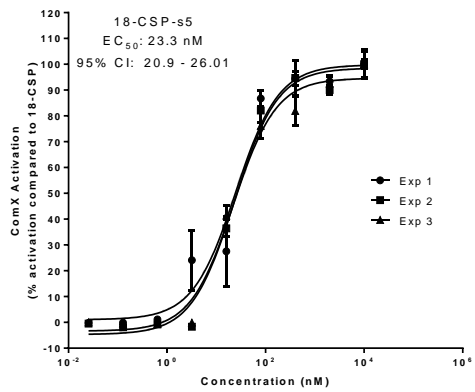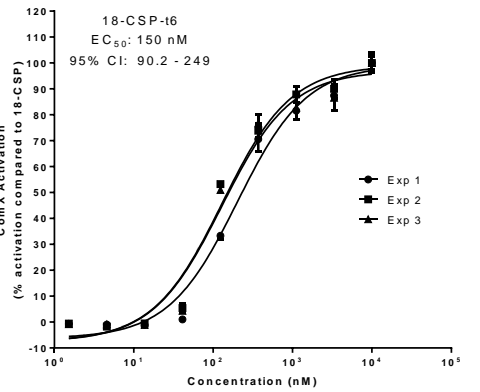

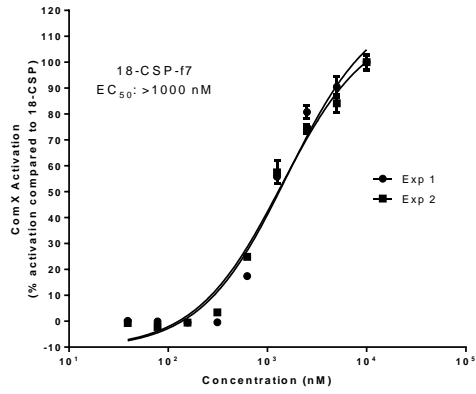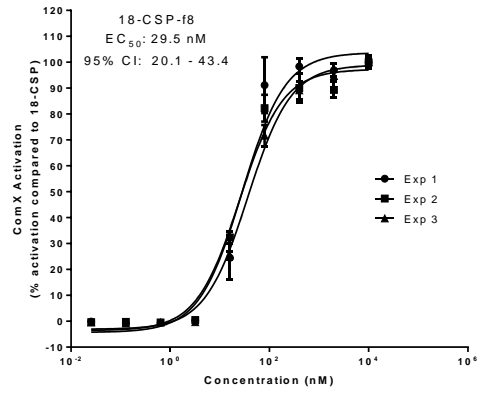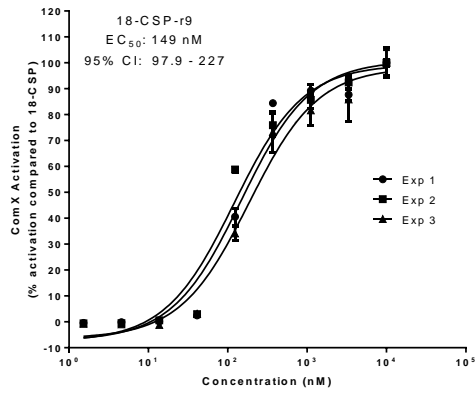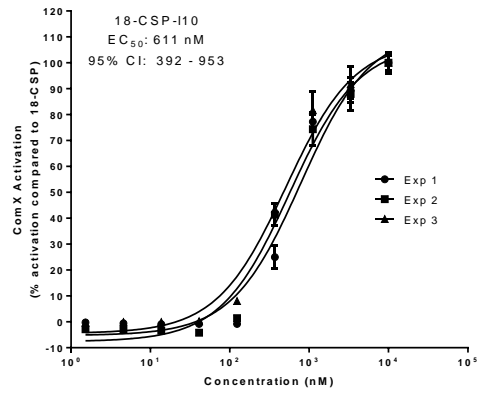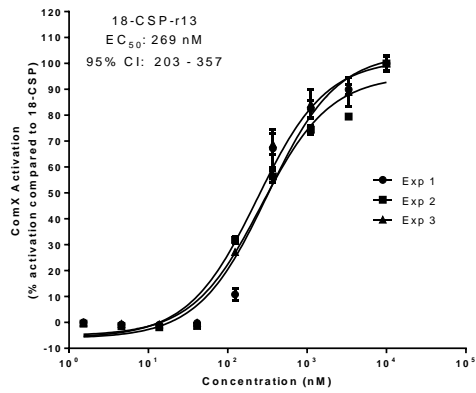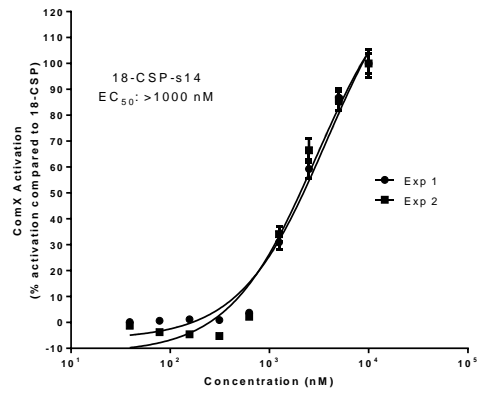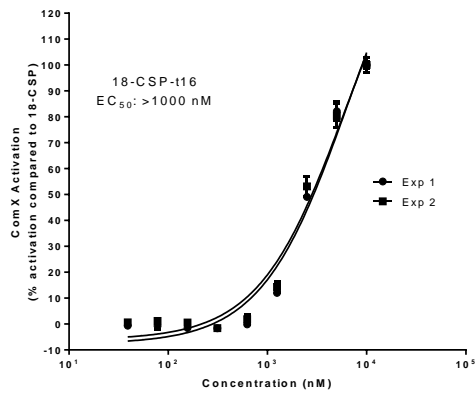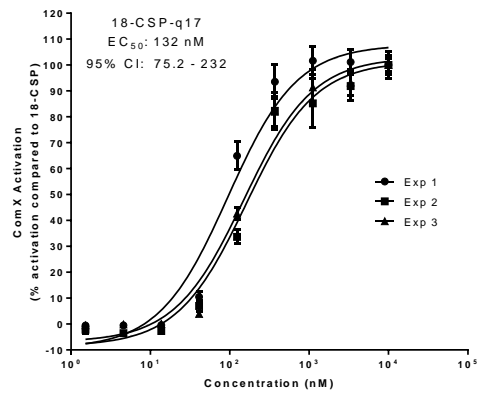

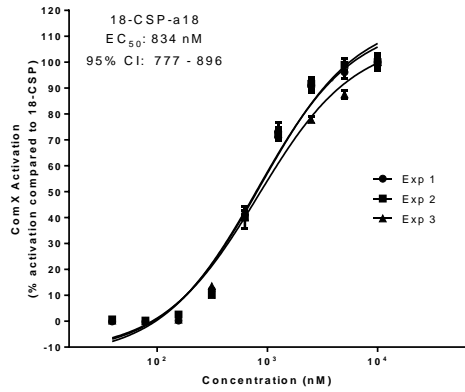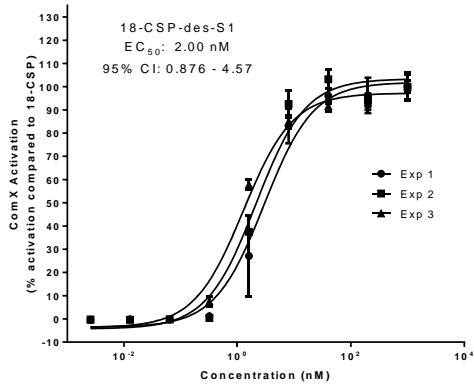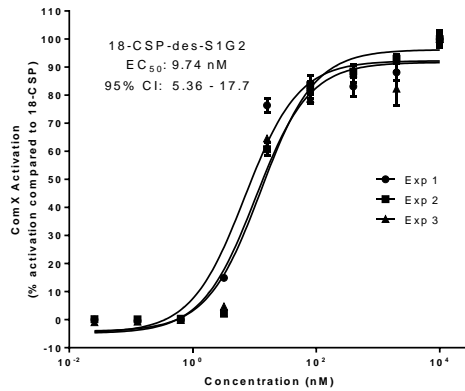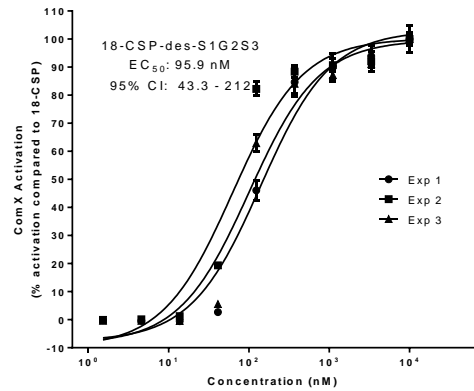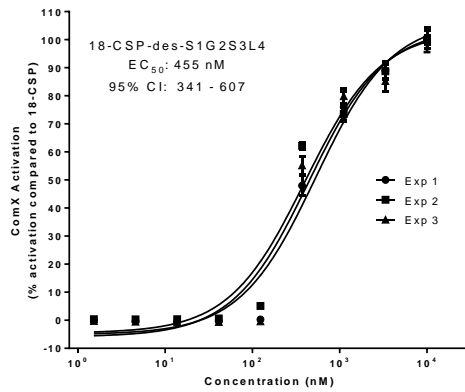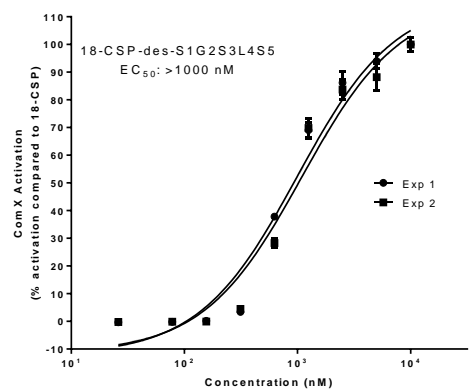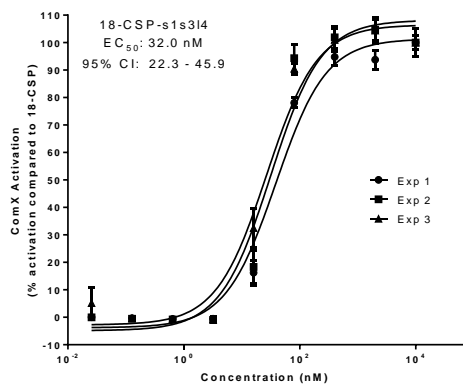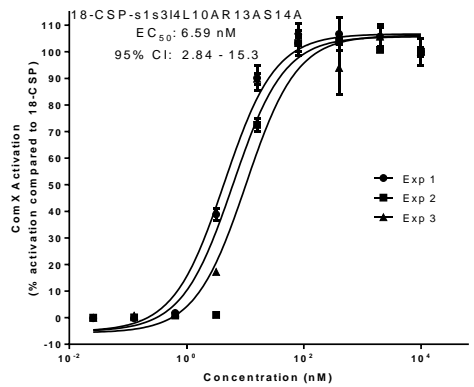

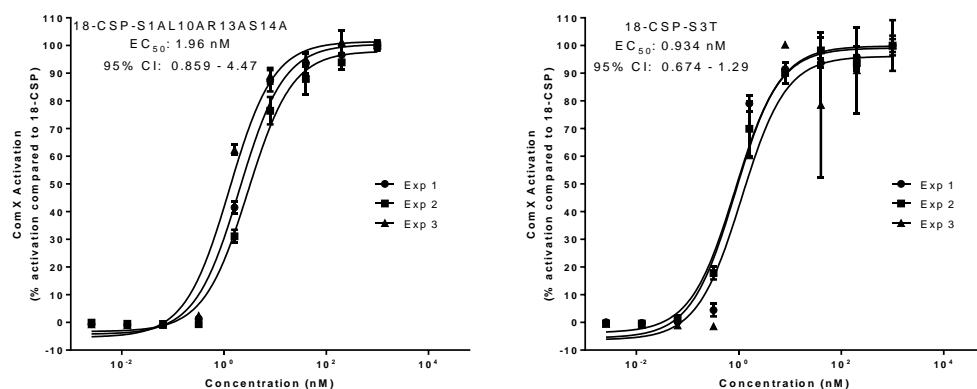

### Complete tables of EC<sub>50</sub> values for CSP analogs (SMCOM2)

**Table S-5.** EC<sub>50</sub> values of the alanine scan of 21-CSP and 18-CSP against the *S. mutans* SMCOM2<sup>a</sup>

| Name        | EC <sub>50</sub> (nM) <sup>b</sup> | 95% CI <sup>c</sup> | Fold change <sup>d</sup> | Name        | EC <sub>50</sub> (nM) <sup>b</sup> | 95% CI <sup>c</sup> | Fold change <sup>d</sup> |
|-------------|------------------------------------|---------------------|--------------------------|-------------|------------------------------------|---------------------|--------------------------|
| 21-CSP      | 69                                 | 57 – 85             |                          | 18-CSP      | 2.4                                | 1.1 – 5.2           |                          |
| 21-CSP-S1A  | 35                                 | 23 – 52             | 0.51                     | 18-CSP-S1A  | 6.8                                | 2.5 – 19            | 2.8                      |
| 21-CSP-G2A  | 72                                 | 39 – 130            | 1.0                      | 18-CSP-G2A  | 18                                 | 9.6 – 34            | 7.5                      |
| 21-CSP-S3A  | 58                                 | 31 – 110            | 0.84                     | 18-CSP-S3A  | 45                                 | 22 – 95             | 19                       |
| 21-CSP-L4A  | -- <sup>e</sup>                    | --                  | --                       | 18-CSP-L4A  | 200                                | 94 – 440            | 83                       |
| 21-CSP-S5A  | 140                                | 120 – 170           | 2.0                      | 18-CSP-S5A  | 29                                 | 23 – 36             | 12                       |
| 21-CSP-T6A  | 120                                | 66 – 210            | 1.7                      | 18-CSP-T6A  | 21                                 | 17 – 25.5           | 8.8                      |
| 21-CSP-F7A  | -- <sup>e</sup>                    | --                  | --                       | 18-CSP-F7A  | 390                                | 210 – 750           | 163                      |
| 21-CSP-F8A  | -- <sup>e</sup>                    | --                  | --                       | 18-CSP-F8A  | >1,000                             | --                  | --                       |
| 21-CSP-R9A  | 420                                | 230 – 760           | 6.1                      | 18-CSP-R9A  | 25                                 | 13 – 47             | 10                       |
| 21-CSP-L10A | 100                                | 54 – 190            | 1.5                      | 18-CSP-L10A | 3.4                                | 1.5 – 7.4           | 1.4                      |
| 21-CSP-F11A | -- <sup>e</sup>                    | --                  | --                       | 18-CSP-F11A | 600                                | 270 – 1300          | 250                      |
| 21-CSP-N12A | -- <sup>e</sup>                    | --                  | --                       | 18-CSP-N12A | 35                                 | 25 – 48             | 15                       |
| 21-CSP-R13A | 130                                | 94 – 170            | 1.9                      | 18-CSP-R13A | 8.6                                | 5.7 – 13            | 3.6                      |
| 21-CSP-S14A | 51                                 | 18 – 140            | 0.74                     | 18-CSP-S14A | 12                                 | 7.3 – 18            | 5.0                      |
| 21-CSP-F15A | -- <sup>e</sup>                    | --                  | --                       | 18-CSP-F15A | -- <sup>e</sup>                    | --                  | --                       |
| 21-CSP-T16A | >1,000                             | --                  | --                       | 18-CSP-T16A | 110                                | 64 – 180            | 46                       |
| 21-CSP-Q17A | 71                                 | 52 – 98             | 1.0                      | 18-CSP-Q17A | 26                                 | 13 – 53             | 11                       |
| 21-CSP-L19A | 71                                 | 45 – 110            | 1.0                      |             |                                    |                     |                          |
| 21-CSP-G20A | 56                                 | 31 – 100            | 0.81                     |             |                                    |                     |                          |
| 21-CSP-K21A | 94                                 | 88 – 100            | 1.4                      |             |                                    |                     |                          |

<sup>a</sup> See experimental section for details on reporter strain and methods. See supporting information for primary screening assay results and plots of agonism dose response curves. All assays were performed in triplicate. <sup>b</sup> EC<sub>50</sub> values determined by testing peptides over a range of concentrations. <sup>c</sup> 95% confidence interval. <sup>d</sup> Ratio where each analog's EC<sub>50</sub> is divided by native CSP EC<sub>50</sub>; a value <1 indicates a better activator than the parent CSP. <sup>e</sup> EC<sub>50</sub> not determined due to the analog's low induction in primary agonism screening assay.



**Table S-6.** EC<sub>50</sub> values of the D-amino acid scan of 21-CSP and 18-CSP against the *S. mutans* SMCOM2<sup>a</sup>

| Name       | EC <sub>50</sub> (nM) <sup>b</sup> | 95% CI <sup>c</sup> | Fold change <sup>d</sup> | Name       | EC <sub>50</sub> (nM) <sup>b</sup> | 95% CI <sup>c</sup> | Fold change <sup>d</sup> |
|------------|------------------------------------|---------------------|--------------------------|------------|------------------------------------|---------------------|--------------------------|
| 21-CSP     | 69                                 | 57 – 85             |                          | 18-CSP     | 2.4                                | 1.1 – 5.2           |                          |
| 21-CSP-s1  | 40                                 | 32 – 52             | 0.58                     | 18-CSP-s1  | 2.1                                | 1.2 – 3.7           | 0.88                     |
| 21-CSP-s3  | 60                                 | 53 – 67             | 0.87                     | 18-CSP-s3  | 12                                 | 6.1 – 25            | 5.0                      |
| 21-CSP-l4  | 170                                | 140 – 210           | 2.5                      | 18-CSP-l4  | 15                                 | 7.1 – 30            | 6.3                      |
| 21-CSP-s5  | 270                                | 250 – 300           | 3.9                      | 18-CSP-s5  | 23                                 | 21 – 26             | 9.6                      |
| 21-CSP-t6  | >1,000                             | --                  | --                       | 18-CSP-t6  | 150                                | 90 – 250            | 63                       |
| 21-CSP-f7  | -- <sup>e</sup>                    | --                  | --                       | 18-CSP-f7  | >1,000                             | --                  | --                       |
| 21-CSP-f8  | 330                                | 280 – 390           | 4.8                      | 18-CSP-f8  | 30                                 | 20 – 43             | 13                       |
| 21-CSP-r9  | >1,000                             | --                  | --                       | 18-CSP-r9  | 150                                | 98 – 230            | 63                       |
| 21-CSP-l10 | >1,000                             | --                  | --                       | 18-CSP-l10 | 610                                | 390 – 950           | 254                      |
| 21-CSP-f11 | -- <sup>e</sup>                    | --                  | --                       | 18-CSP-f11 | -- <sup>e</sup>                    | --                  | --                       |
| 21-CSP-n12 | -- <sup>e</sup>                    | --                  | --                       | 18-CSP-n12 | -- <sup>e</sup>                    | --                  | --                       |
| 21-CSP-r13 | >1,000                             | --                  | --                       | 18-CSP-r13 | 270                                | 200 – 360           | 113                      |
| 21-CSP-s14 | -- <sup>e</sup>                    | --                  | --                       | 18-CSP-s14 | >1,000                             | --                  | --                       |
| 21-CSP-f15 | -- <sup>e</sup>                    | --                  | --                       | 18-CSP-f15 | -- <sup>e</sup>                    | --                  | --                       |
| 21-CSP-t16 | -- <sup>e</sup>                    | --                  | --                       | 18-CSP-t16 | >1,000                             | --                  | --                       |
| 21-CSP-q17 | -- <sup>e</sup>                    | --                  | --                       | 18-CSP-q17 | 130                                | 75 – 230            | 54                       |
| 21-CSP-a18 | -- <sup>e</sup>                    | --                  | --                       | 18-CSP-a18 | 830                                | 780 – 900           | 346                      |
| 21-CSP-l19 | >1,000                             | --                  | --                       |            |                                    |                     |                          |
| 21-CSP-k21 | 130                                | 60 – 270            | 1.9                      |            |                                    |                     |                          |

<sup>a</sup> See experimental section for details on the reporter strain and methods. See supporting information for primary screening assay results and plots of agonism dose response curves. All assays performed in triplicate. <sup>b</sup> EC<sub>50</sub> values determined by testing peptides over a range of concentrations. <sup>c</sup> 95% confidence interval. <sup>d</sup> Ratio where each analog's EC<sub>50</sub> is divided by native CSP EC<sub>50</sub>; a value <1 indicates a better activator than the parent CSP. <sup>e</sup> EC<sub>50</sub> not determined due to the analog's low induction in primary agonism screening assay.

**Table S-7.** EC<sub>50</sub> Values of the 2<sup>nd</sup> generation Analogs of 21-CSP and 18-CSP against the *S. mutans* SMCOM2<sup>a</sup>

| Name                  | EC <sub>50</sub> (nM) <sup>b</sup> | 95% CI <sup>c</sup> | Fold change <sup>d</sup> | Name                      | EC <sub>50</sub> (nM) <sup>b</sup> | 95% CI <sup>c</sup> | Fold change <sup>d</sup> |
|-----------------------|------------------------------------|---------------------|--------------------------|---------------------------|------------------------------------|---------------------|--------------------------|
| 21-CSP                | 69                                 | 57 – 85             |                          | 18-CSP                    | 2.4                                | 1.1 – 5.2           |                          |
| 21-CSP-des-S1         | 13                                 | 8.2 – 21            | 0.19                     | 18-CSP-des-S1             | 2.0                                | 0.88 – 4.6          | 0.83                     |
| 21-CSP-des-S1G2       | 37                                 | 21 – 63             | 0.53                     | 18-CSP-des-S1G2           | 9.7                                | 5.4 – 18            | 4.0                      |
| 21-CSP-des-S1G2S3     | 520                                | 420 – 630           | 7.5                      | 18-CSP-des-S1G2S3         | 96                                 | 43 – 210            | 40                       |
| 21-CSP-des-S1G2S3L4   | >1,000                             | --                  | --                       | 18-CSP-des-S1G2S3L4       | 460                                | 340 – 610           | 192                      |
| 21-CSP-des-S1G2S3L4S5 | >1,000                             | --                  | --                       | 18-CSP-des-S1G2S3L4S5     | >1,000                             | --                  | --                       |
| 21-CSP-des-K21        | 51                                 | 24 – 110            | 0.74                     | 18-CSP-des-A18            | -- <sup>e</sup>                    | --                  | --                       |
| 21-CSP-des-G20K21     | >1,000                             | --                  | --                       | 18-CSP-des-Q17A18         | -- <sup>e</sup>                    | --                  | --                       |
| 21-CSP-S3T            | 34                                 | 24 – 49             | 0.49                     | 18-CSP-S3T                | 0.93                               | 0.67 – 1.3          | 0.39                     |
|                       |                                    |                     |                          | 18-CSP-s1s3l4             | 32                                 | 22 – 46             | 13                       |
|                       |                                    |                     |                          | 18-CSP-s1s3l4L10AR13AS14A | 6.6                                | 2.8 – 15            | 2.8                      |
|                       |                                    |                     |                          | 18-CSP-S1AL10AR13AS14A    | 2.0                                | 0.86 – 4.5          | 0.83                     |

<sup>a</sup> See experimental section for details on the reporter strain and methods. See supporting information for primary screening assay results and plots of agonism dose response curves. All assays performed in triplicate. <sup>b</sup> EC<sub>50</sub> values determined by testing peptides over a range of concentrations. <sup>c</sup> 95% confidence interval. <sup>d</sup> Ratio where each analog's EC<sub>50</sub> is divided by native CSP EC<sub>50</sub>; a value <1 indicates a better activator than the parent CSP. <sup>e</sup> EC<sub>50</sub> not determined due to the analog's low induction in primary agonism screening assay.

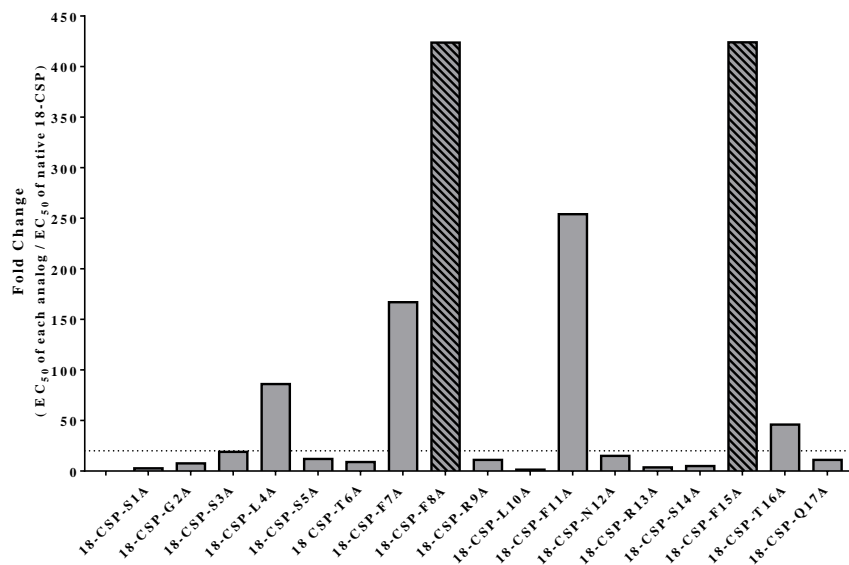

**Figure S-13.** Plot of the ratio of 18-CSP alanine analogs EC<sub>50</sub> values divided by the EC<sub>50</sub> value of 18-CSP in the SMCOM2 strain. The plot reveals a periodic sharp reduction in activity every 3-4 residues along the peptide sequence, consistent with an  $\alpha$ -helix conformation. Striped bars represent analogs with EC<sub>50</sub> values >1,000 nM, thus the EC<sub>50</sub> ratio is >425. >20-fold decrease in potency was considered significant (dashed line).

### Comparison of results found from both reporter strains SAB249 and SMCOM2

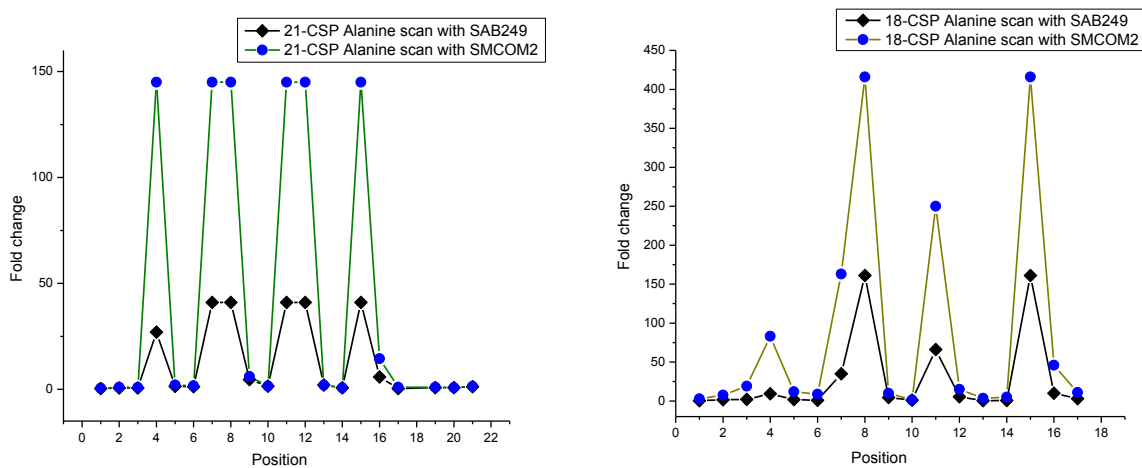

**Figure S-14.** Comparison of alanine scan results of 21-CSP and 18-CSP with both reporter strains SAB249 and SMCOM2. These results showed a similar trend in changing activity with both reporter systems.

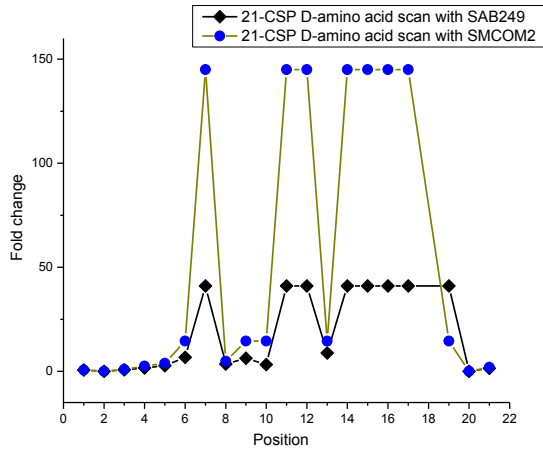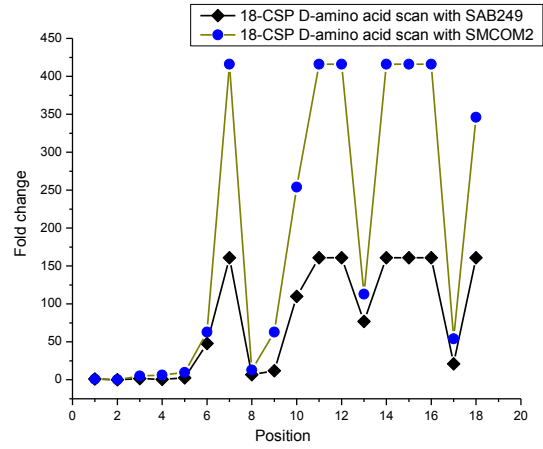

**Figure S-15.** Comparison of D-amino acid scan results of 21-CSP and 18-CSP with both reporter strains SAB249 and SMCOM2. These results showed a similar trend in changing activity with both reporter systems.

## Circular dichroism (CD) spectra

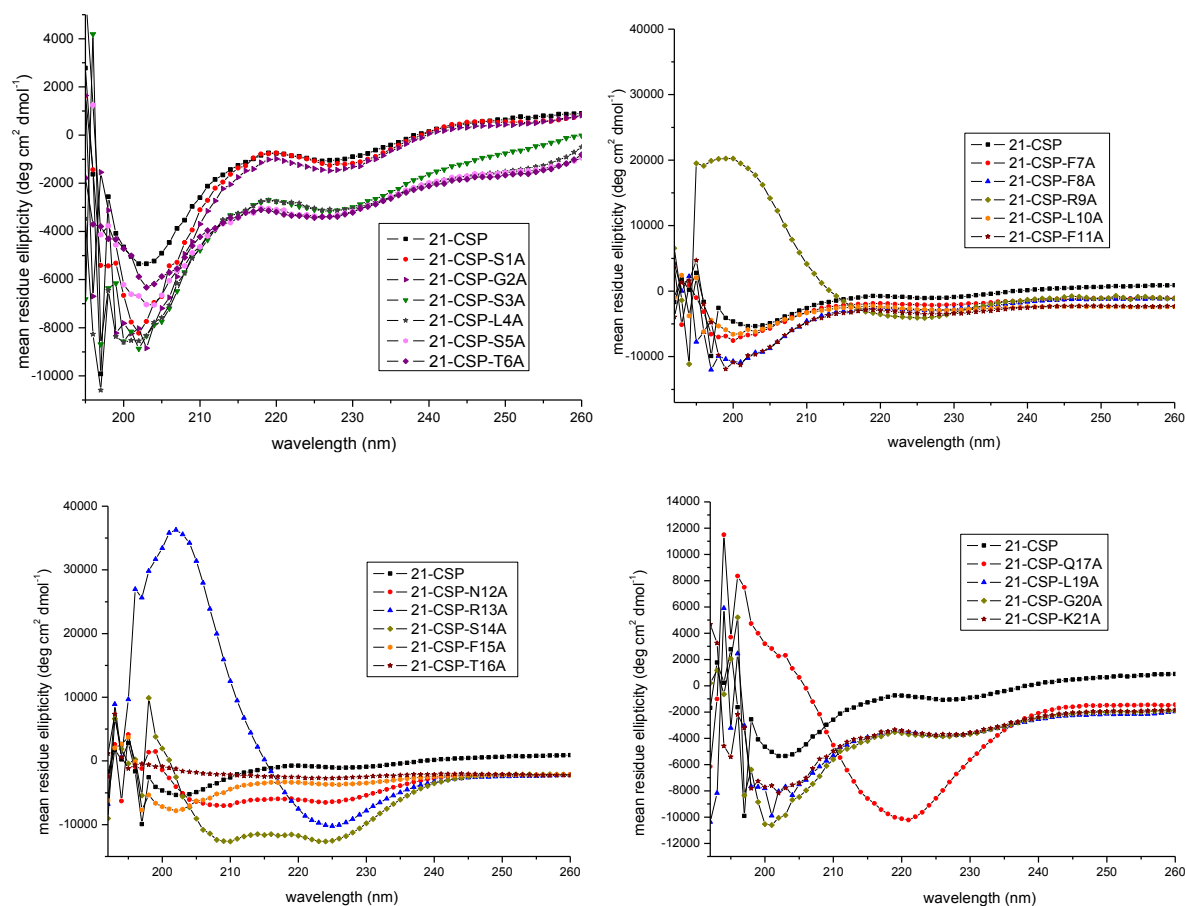

**Figure S-16.** CD spectra of the 21-CSP alanine scan library in aqueous solution (PBS, pH 7.4). All the measurements were performed with a peptide concentration of 200  $\mu$ M. 21-CSP was added as a control. Most peptides exhibit a random coil pattern, while 21-CSP-R9A and 21-CSP-R13A exhibit a  $\beta$ -turn pattern, 21-CSP-Q17A exhibits a  $\beta$ -sheet pattern, and 21-CSP-S14A exhibits an  $\alpha$ -helix pattern.

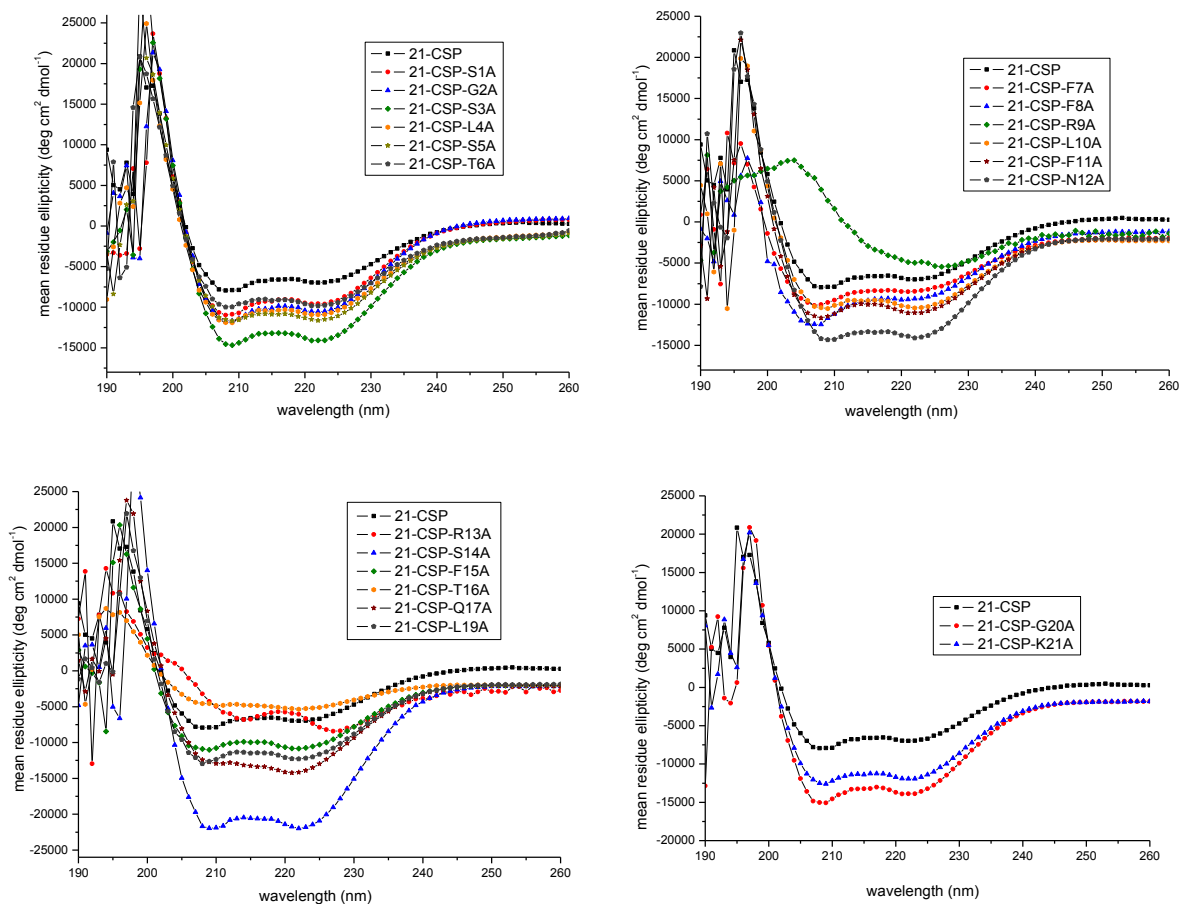

**Figure S-17.** CD spectra of the 21-CSP alanine scan library in membrane mimicking conditions (20% TFE: 80% PBS, pH 7.4). All the measurements were performed with a peptide concentration of 200  $\mu\text{M}$ . 21-CSP was added as a control. Peptides exhibit varying degrees of an  $\alpha$ -helix pattern. Measurements of 21-CSP-R9A and 21-CSP-R13A were performed with a peptide concentration of 100  $\mu\text{M}$ . 21-CSP-R9A exhibits a distorted  $\beta$ -sheet pattern and 21-CSP-R13A exhibits a distorted  $\alpha$ -helix (mixed with  $\beta$ -sheets and  $\beta$ -turns) pattern.<sup>1</sup>

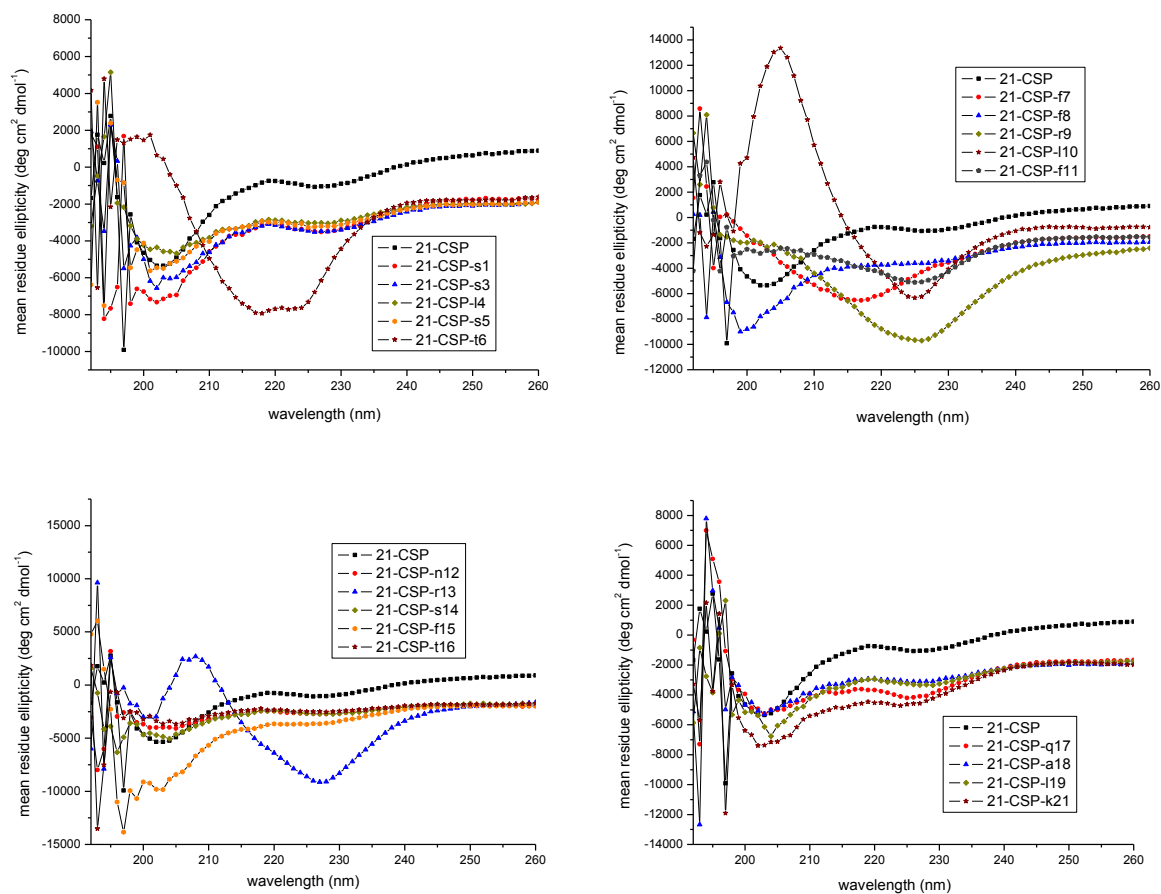

**Figure S-18.** CD spectra of the 21-CSP D-amino acid scan library in aqueous solution (PBS, pH 7.4). All the measurements were performed with a peptide concentration of 200  $\mu$ M. 21-CSP was added as a control. Most peptides exhibit a random coil pattern, while 21-CSP-t6 exhibits an  $\alpha$ -helix pattern, 21-CSP-r9 and 21-CSP-f11 exhibit a  $\beta$ -sheet pattern, and 21-CSP-110 and 21-CSP-r13 exhibit a  $\beta$ -turn pattern.

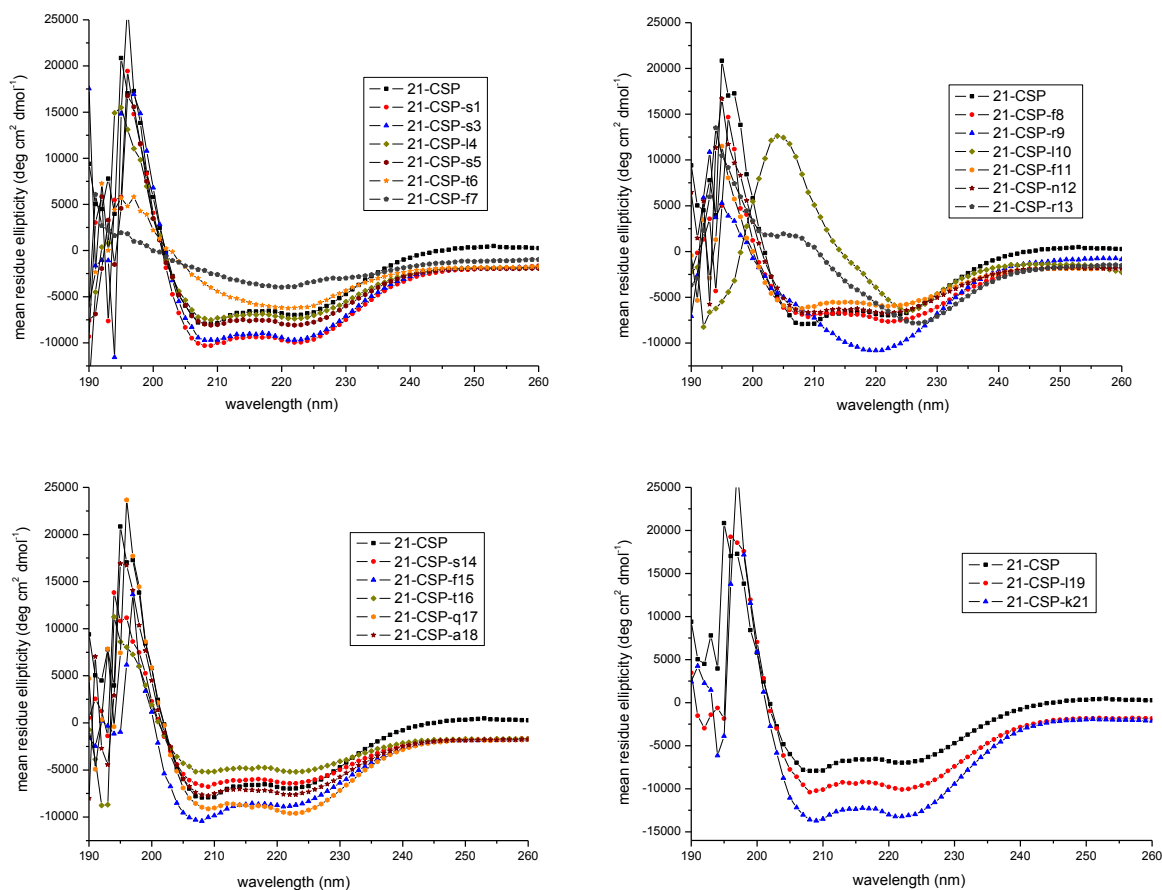

**Figure S-19.** CD spectra of the 21-CSP D-amino acid scan library in membrane mimicking conditions (20% TFE: 80% PBS, pH 7.4). All the measurements were performed with a peptide concentration of 200  $\mu$ M. 21-CSP was added as a control. Most Peptides exhibit varying degrees of an  $\alpha$ -helix pattern, while 21-CSP-t6 and 21-CSP-r9 exhibit a  $\beta$ -sheet pattern, 21-CSP-f7 exhibits a distorted  $\beta$ -sheet (mixed with  $\alpha$ -helix) pattern, and 21-CSP-t10 and 21-CSP-r13 exhibit a  $\beta$ -turn pattern.

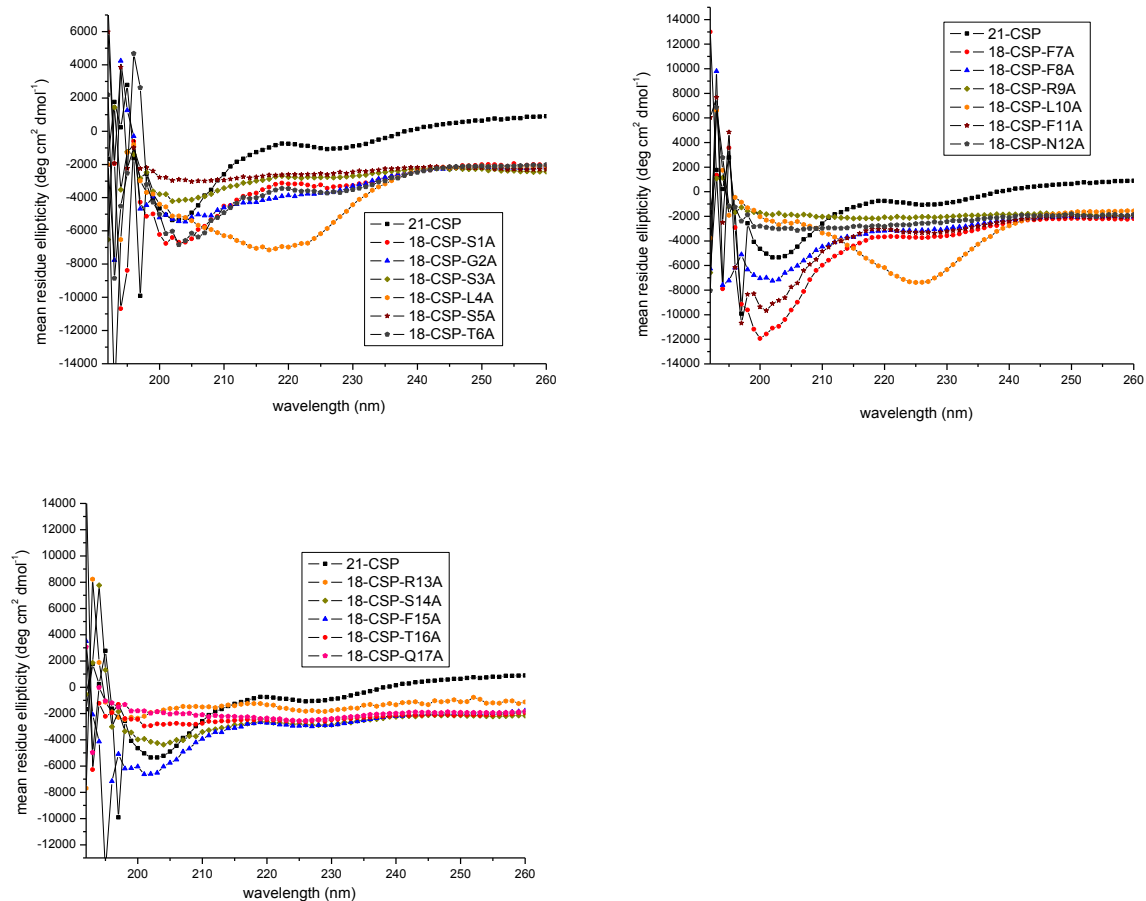

**Figure S-20.** CD spectra of the 18-CSP alanine scan library in aqueous solution (PBS, pH 7.4). All the measurements were performed with a peptide concentration of 200  $\mu$ M. Measurements of 18-CSP-R9A and 18-CSP-R13A were performed with a peptide concentration of 100  $\mu$ M as these peptides showed low solubility in PBS. 21-CSP was added as a control. Most peptides exhibit a random coil pattern, while few peptides exhibit a  $\beta$ -sheet pattern.



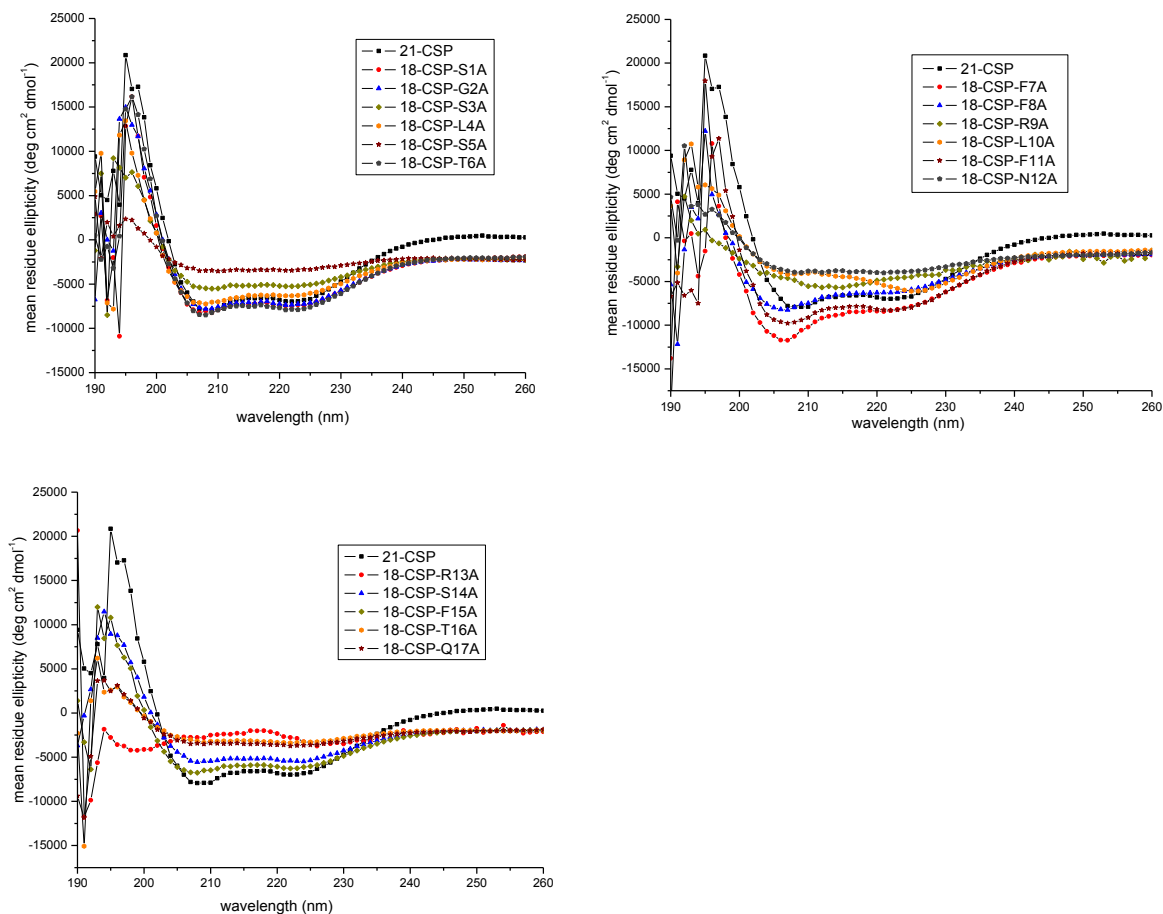

**Figure S-21.** CD spectra of the 18-CSP alanine scan library in membrane mimicking conditions (20% TFE: 80% PBS, pH 7.4). All the measurements were performed with a peptide concentration of 200  $\mu$ M. Measurements of 18-CSP-R9A and 18-CSP-R13A were performed with a peptide concentration of 100  $\mu$ M as these peptides showed low solubility in PBS. 21-CSP was added as a control. Peptides exhibit varying degrees of an  $\alpha$ -helix pattern, while 18-CSP-L10A exhibits a distorted  $\alpha$ -helix (mixed with  $\beta$ -sheet) pattern, 18-CSP-R9A exhibits a distorted  $\alpha$ -helix (mixed with  $\beta$ -sheets) pattern, and 18-CSP-R13A exhibits a distorted  $\alpha$ -helix (mixed with  $\beta$ -turns) pattern.

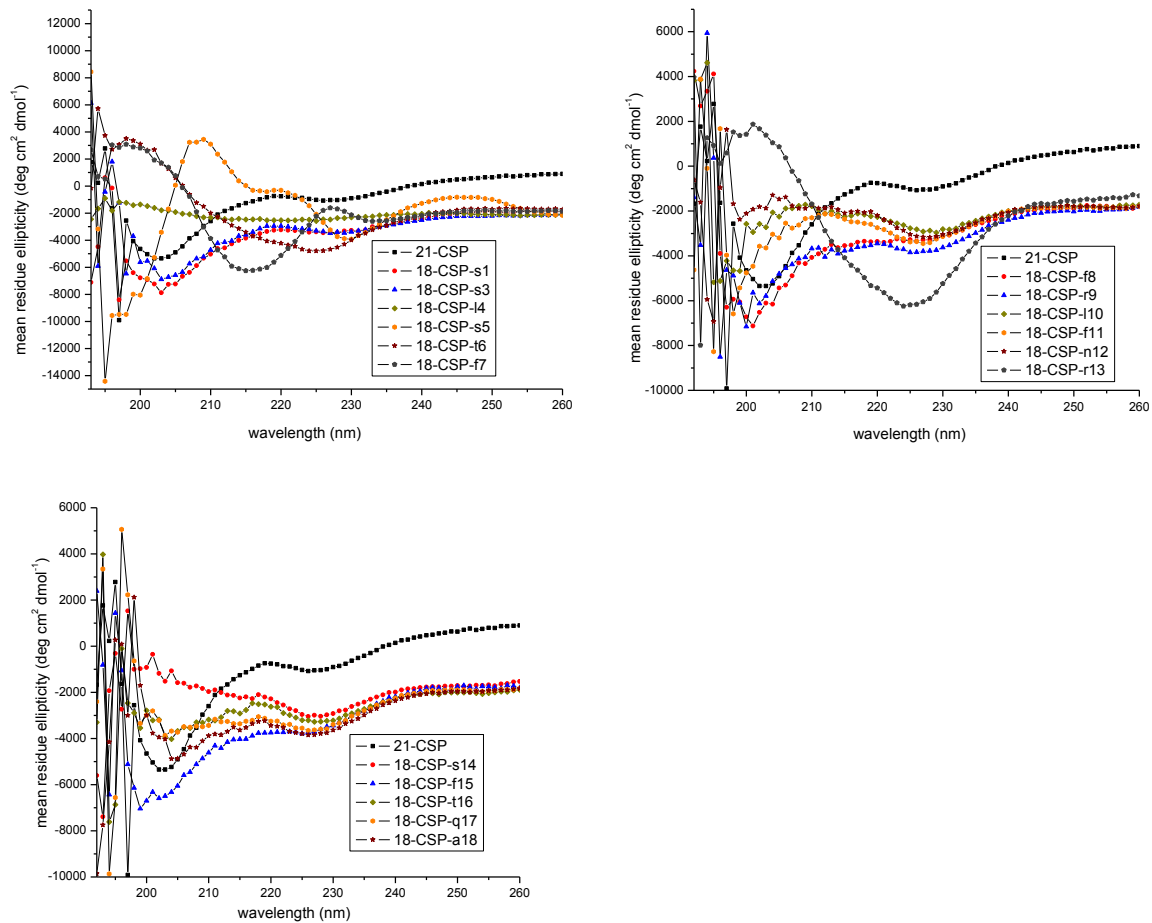

**Figure S-22.** CD spectra of the 18-CSP D-amino acid scan library in aqueous solution (PBS, pH 7.4). All the measurements were performed with a peptide concentration of 200  $\mu\text{M}$ . 21-CSP was added as a control. Most peptides exhibit a random coil pattern, while few peptides exhibit a  $\beta$ -sheet pattern.

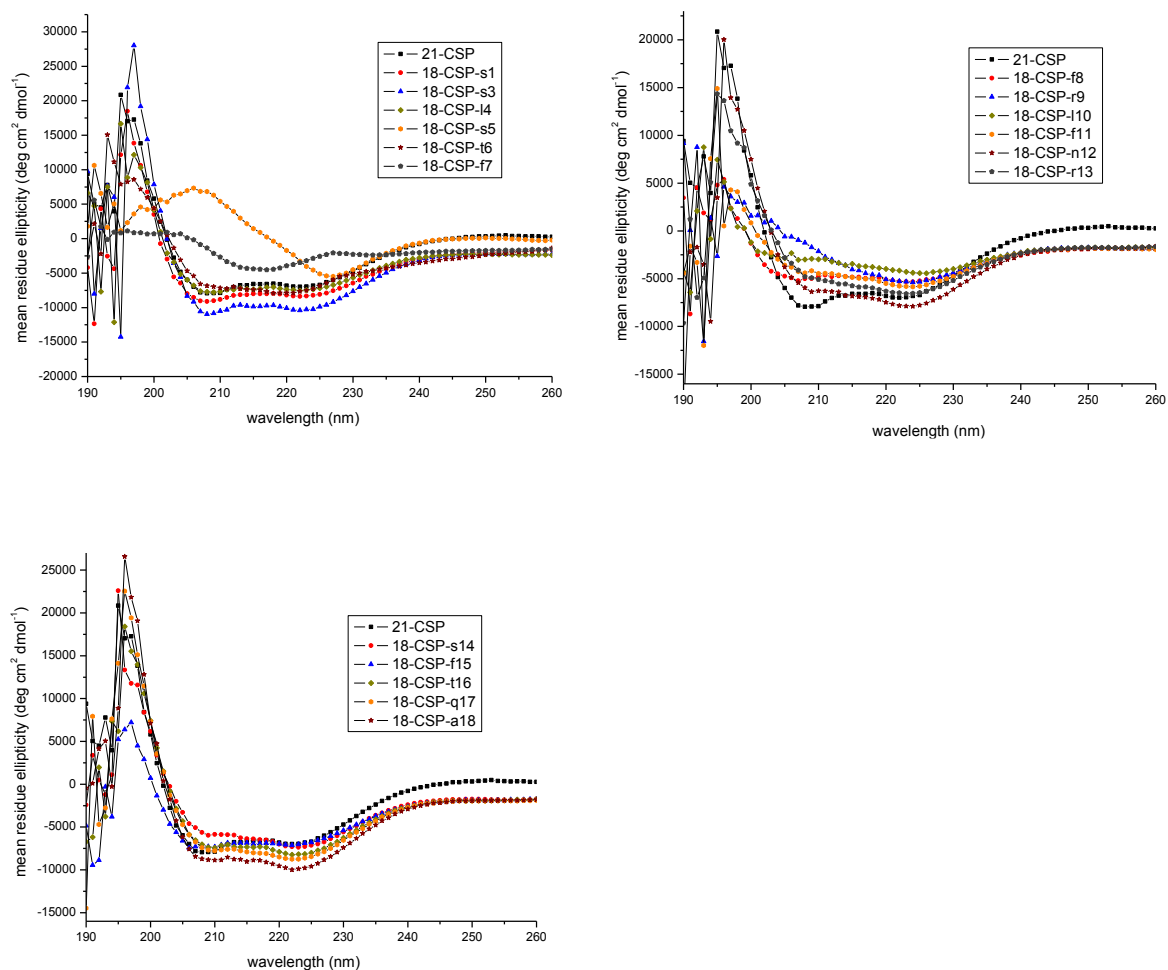

**Figure S-23.** CD spectra of the 18-CSP D-amino acid scan library in membrane mimicking conditions (20% TFE: 80% PBS, pH 7.4). All the measurements were performed with a peptide concentration of 200  $\mu$ M. 21-CSP was added as a control. Most peptides exhibit varying degrees of an  $\alpha$ -helix pattern, while 18-CSP-s5 exhibits a  $\beta$ -turn pattern, and 18-CSP-f7 and 18-CSP-r9 exhibit a  $\beta$ -sheet pattern.

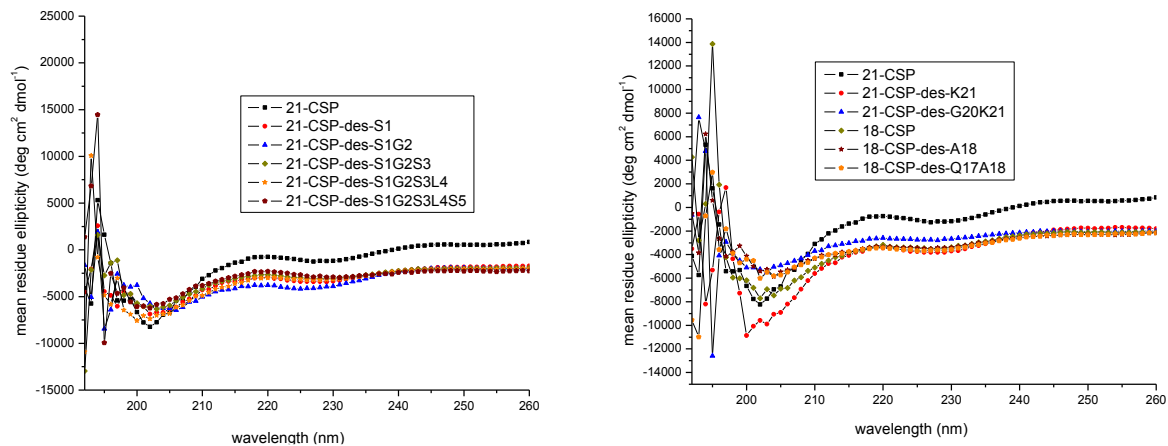

**Figure S-24.** CD spectra of the 21-CSP and 18-CSP truncated analogs in aqueous solution (PBS, pH 7.4). All the measurements were performed with a peptide concentration of 200  $\mu\text{M}$ . 21-CSP was added as a control. All peptides exhibit a random coil pattern.

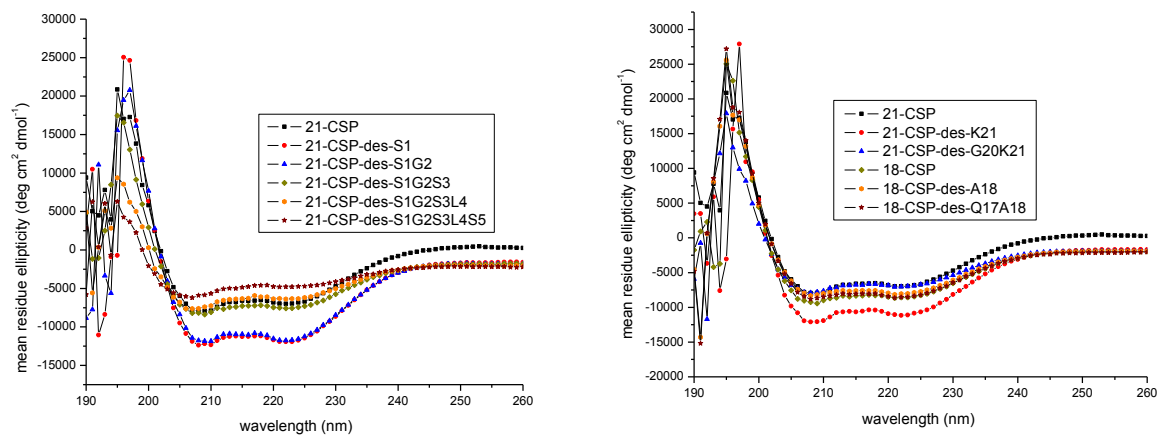

**Figure S-25.** CD spectra of the 21-CSP and 18-CSP truncated analogs in membrane mimicking conditions (20% TFE: 80% PBS, pH 7.4). All the measurements were performed with a peptide concentration of 200  $\mu\text{M}$ . 21-CSP was added as a control. Peptides exhibit varying degrees of an  $\alpha$ -helix pattern.

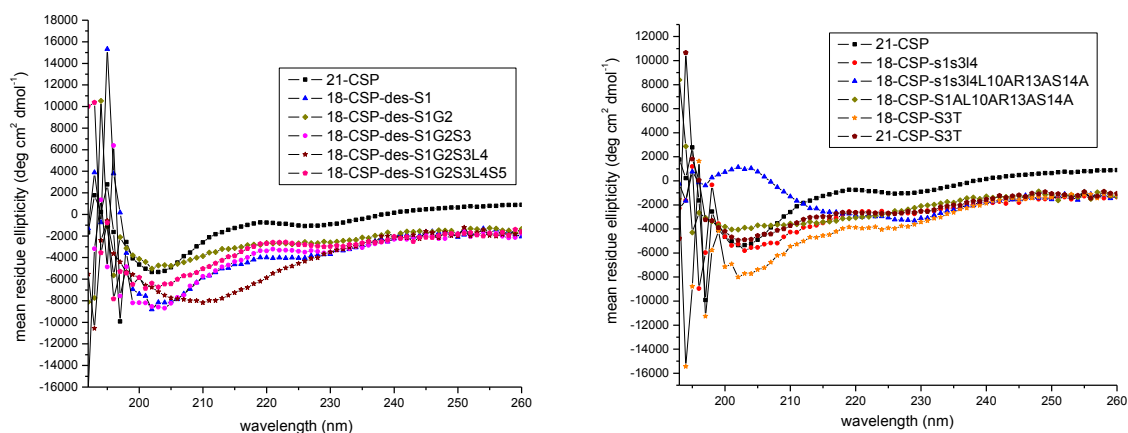

**Figure S-26.** CD spectra of 18-CSP truncated and 2<sup>nd</sup> generation CSP analogs in aqueous solution (PBS, pH 7.4). All the measurements were performed with a peptide concentration of 200  $\mu$ M. 21-CSP was added as a control. Most peptides exhibit a random coil pattern, while 18-CSP-S1G2S3L4 exhibits a  $\beta$ -sheet pattern and 18-CSP-s1s3l4L10AR13AS14A exhibits a distorted  $\beta$ -sheet pattern.

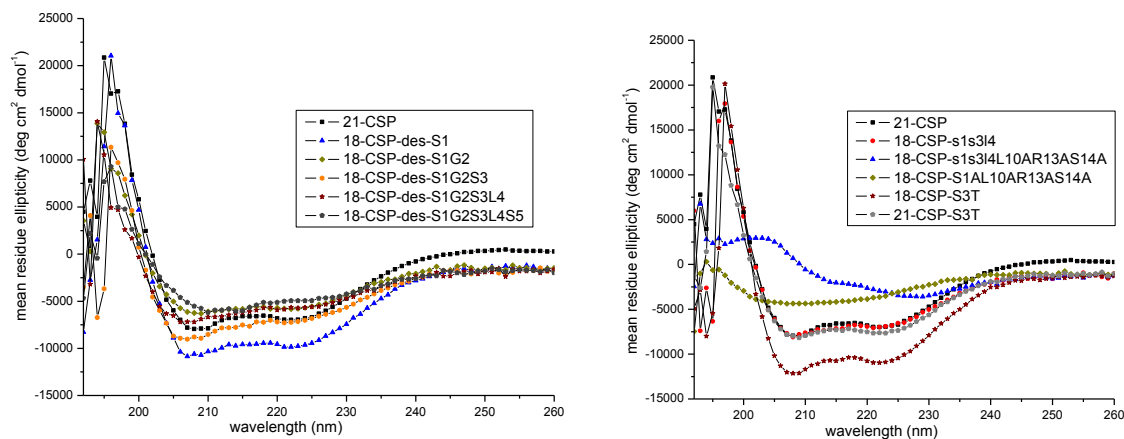

**Figure S-27.** CD spectra of 18-CSP truncated and 2<sup>nd</sup> generation CSP analogs in membrane mimicking conditions (20% TFE: 80% PBS, pH 7.4). All the measurements were performed with a peptide concentration of 200  $\mu$ M. 21-CSP was added as a control. Most peptides exhibit varying degrees of an  $\alpha$ -helix pattern, while 18-CSP-s1s3l4L10AR13AS14A exhibits a distorted  $\beta$ -sheet (mixed with  $\beta$ -turn) pattern, and 18-CSP-S1AL10AR13AS14A exhibits a distorted  $\alpha$ -helix (mixed with  $\beta$ -sheet) pattern.

**Table S-8.** EC<sub>50</sub> values (SAB249) and percent helicity (in 20% TFE) data for 21-CSP alanine & D-amino acid scanning analogs.

| Compound Name | EC <sub>50</sub> (nM) | Helicity (%)              | Compound Name | EC <sub>50</sub> (nM) | Helicity (%)             |
|---------------|-----------------------|---------------------------|---------------|-----------------------|--------------------------|
| 21-CSP        | 240                   | 18.0%                     |               |                       |                          |
| 21-CSP-S1A    | 90                    | 24.7%                     | 21-CSP-s1     | 140                   | 25.7%                    |
| 21-CSP-G2A    | 140                   | 27.2%                     | --            |                       |                          |
| 21-CSP-S3A    | 150                   | 36.3%                     | 21-CSP-s3     | 160                   | 25.0%                    |
| 21-CSP-L4A    | 6500                  | 28.2%                     | 21-CSP-l4     | 390                   | 19.0%                    |
| 21-CSP-S5A    | 330                   | 30.0%                     | 21-CSP-s5     | 640                   | 20.9%                    |
| 21-CSP-T6A    | 280                   | 25.4%                     | 21-CSP-t6     | 1600                  | $\beta$ -sheet           |
| 21-CSP-F7A    | --                    | 21.8%                     | 21-CSP-f7     | --                    | Distorted $\beta$ -sheet |
| 21-CSP-F8A    | --                    | 24.1%                     | 21-CSP-f8     | 840                   | 19.8%                    |
| 21-CSP-R9A    | 1100                  | Distorted $\beta$ -sheet  | 21-CSP-r9     | 1500                  | $\beta$ -sheet           |
| 21-CSP-L10A   | 370                   | 27.0%                     | 21-CSP-l10    | 760                   | $\beta$ -turn            |
| 21-CSP-F11A   | --                    | 28.5%                     | 21-CSP-f11    | --                    | 15.4%                    |
| 21-CSP-N12A   | --                    | 36.4%                     | 21-CSP-n12    | --                    | 17.5%                    |
| 21-CSP-R13A   | 480                   | Distorted $\alpha$ -helix | 21-CSP-r13    | 2100                  | $\beta$ -turn            |
| 21-CSP-S14A   | 160                   | 56.7%                     | 21-CSP-s14    | --                    | 16.6%                    |
| 21-CSP-F15A   | --                    | 28.0%                     | 21-CSP-f15    | --                    | 22.8%                    |
| 21-CSP-T16A   | 1400                  | 13.8%                     | 21-CSP-t16    | --                    | 13.4%                    |
| 21-CSP-Q17A   | 94                    | 36.5%                     | 21-CSP-q17    | --                    | 24.8%                    |
| --            |                       |                           | 21-CSP-a18    | --                    | 19.7%                    |
| 21-CSP-L19A   | 190                   | 31.7%                     | 21-CSP-l19    | --                    | 26.0%                    |
| 21-CSP-G20A   | 190                   | 35.9%                     | --            |                       |                          |
| 21-CSP-K21A   | 290                   | 30.8%                     | 21-CSP-k21    | 330                   | 34.1%                    |

**Table S-9.** EC<sub>50</sub> values (SAB249) and percent helicity (in 20% TFE) data for 18-CSP alanine & D-amino acid scanning analogs.

| Compound Name | EC <sub>50</sub> (nM) | Helicity (%)              | Compound Name | EC <sub>50</sub> (nM) | Helicity (%)   |
|---------------|-----------------------|---------------------------|---------------|-----------------------|----------------|
| 18-CSP        | 6.2                   | 22.6%                     |               |                       |                |
| 18-CSP-S1A    | 2.6                   | 19.8%                     | 18-CSP-s1     | 6.4                   | 22.1%          |
| 18-CSP-G2A    | 9.7                   | 19.4%                     | --            |                       |                |
| 18-CSP-S3A    | 13                    | 13.9%                     | 18-CSP-s3     | 9.4                   | 27.5%          |
| 18-CSP-L4A    | 57                    | 16.7%                     | 18-CSP-l4     | 4.5                   | 19.9%          |
| 18-CSP-S5A    | 11                    | 9.13%                     | 18-CSP-s5     | 17                    | $\beta$ -turn  |
| 18-CSP-T6A    | 6.0                   | 20.7%                     | 18-CSP-t6     | 300                   | 20.3%          |
| 18-CSP-F7A    | 220                   | 22.0%                     | 18-CSP-f7     | >1,000                | $\beta$ -sheet |
| 18-CSP-F8A    | >1,000                | 16.6%                     | 18-CSP-f8     | 42                    | 13.4%          |
| 18-CSP-R9A    | 27                    | Distorted $\alpha$ -helix | 18-CSP-r9     | 76                    | $\beta$ -sheet |
| 18-CSP-L10A   | 6.5                   | Distorted $\alpha$ -helix | 18-CSP-l10    | 670                   | 10.9%          |
| 18-CSP-F11A   | 410                   | 21.9%                     | 18-CSP-f11    | --                    | 15.2%          |
| 18-CSP-N12A   | 33                    | 10.4%                     | 18-CSP-n12    | --                    | 20.7%          |
| 18-CSP-R13A   | 2.7                   | Distorted $\alpha$ -helix | 18-CSP-r13    | 480                   | 17.1%          |
| 18-CSP-S14A   | 4.5                   | 14.3%                     | 18-CSP-s14    | >1,000                | 19.3%          |
| 18-CSP-F15A   | --                    | 16.6%                     | 18-CSP-f15    | --                    | 18.8%          |
| 18-CSP-T16A   | 64                    | 8.90%                     | 18-CSP-t16    | >1,000                | 21.8%          |
| 18-CSP-Q17A   | 19                    | 9.90%                     | 18-CSP-q17    | 130                   | 23.1%          |
| --            |                       |                           | 18-CSP-a18    | >1,000                | 26.4%          |

**Table S-10.** EC<sub>50</sub> values (SAB249) and percent helicity (in 20% TFE) data for 21-CSP and 18-CSP truncated & 2<sup>nd</sup> generation analogs.

| Compound Name             | EC <sub>50</sub> (nM) | Helicity (%)              |
|---------------------------|-----------------------|---------------------------|
| 21-CSP-des-S1             | 23                    | 31.0%                     |
| 21-CSP-des-S1G2           | 120                   | 30.8%                     |
| 21-CSP-des-S1G2S3         | 530                   | 20.0%                     |
| 21-CSP-des-S1G2S3L4       | 3600                  | 16.9%                     |
| 21-CSP-des-S1G2S3L4S5     | 3300                  | 12.9%                     |
| 21-CSP-des-K21            | 98                    | 28.9%                     |
| 21-CSP-des-G20K21         | 3600                  | 18.4%                     |
| 18-CSP-des-S1             | 4.8                   | 26.3%                     |
| 18-CSP-des-S1G2           | 7.9                   | 15.5%                     |
| 18-CSP-des-S1G2S3         | 85                    | 19.7%                     |
| 18-CSP-des-S1G2S3L4       | 570                   | 15.7%                     |
| 18-CSP-des-S1G2S3L4S5     | 950                   | 13.4%                     |
| 18-CSP-des-A18            | --                    | 21.4%                     |
| 18-CSP-des-Q17A18         | --                    | 23.0%                     |
| 18-CSP-s1s3l4             | 17                    | 18.4%                     |
| 18-CSP-s1s3l4L10AR13AS14A | 3.4                   | Distorted $\beta$ -sheet  |
| 18-CSP-S1AL10AR13AS14A    | 1.7                   | Distorted $\alpha$ -helix |
| 18-CSP-S3T                | 2.1                   | 28.9%                     |
| 21-CSP-S3T                | 94                    | 19.7%                     |

**Table S-11.** EC<sub>50</sub> values (SAB249) and estimated secondary structure contents (in 20% TFE) data for 21-CSP alanine scan analogs.

| Compound Name | EC <sub>50</sub> (nM) | Estimated secondary structure contents (%) <sup>a</sup> |                             |                         |               |        |
|---------------|-----------------------|---------------------------------------------------------|-----------------------------|-------------------------|---------------|--------|
|               |                       | $\alpha$ -helix                                         | Antiparallel $\beta$ -sheet | Parallel $\beta$ -sheet | $\beta$ -turn | Others |
| 21-CSP        | 240                   | 27.1                                                    | 16.4                        | 0.0                     | 9.7           | 46.7   |
| 21-CSP-S1A    | 90                    | 34.2                                                    | 17.0                        | 0.0                     | 5.8           | 43.1   |
| 21-CSP-G2A    | 140                   | 37.3                                                    | 19.1                        | 0.0                     | 7.4           | 36.2   |
| 21-CSP-S3A    | 150                   | 38.0                                                    | 9.5                         | 0.0                     | 5.1           | 47.4   |
| 21-CSP-L4A    | 6500                  | 32.9                                                    | 5.3                         | 0.0                     | 8.5           | 53.4   |
| 21-CSP-S5A    | 330                   | 34.3                                                    | 5.5                         | 0.0                     | 8.1           | 52.1   |
| 21-CSP-T6A    | 280                   | 30.0                                                    | 5.9                         | 0.9                     | 10.3          | 52.9   |
| 21-CSP-F7A    | --                    | 22.0                                                    | 10.1                        | 3.1                     | 14.8          | 50.1   |
| 21-CSP-F8A    | --                    | 24.9                                                    | 11.5                        | 1.9                     | 12.0          | 49.8   |
| 21-CSP-R9A    | 1100                  | 4.1                                                     | 28.6                        | 19.3                    | 14.6          | 33.5   |
| 21-CSP-L10A   | 370                   | 32.8                                                    | 17.6                        | 0.0                     | 10.5          | 39.1   |
| 21-CSP-F11A   | --                    | 29.7                                                    | 11.1                        | 0.0                     | 7.7           | 51.5   |
| 21-CSP-N12A   | --                    | 33.4                                                    | 9.7                         | 0.0                     | 7.6           | 49.3   |
| 21-CSP-R13A   | 480                   | 13.8                                                    | 9.1                         | 17.9                    | 19.6          | 39.6   |
| 21-CSP-S14A   | 160                   | 41.9                                                    | 25.5                        | 23.2                    | 1.7           | 7.7    |
| 21-CSP-F15A   | --                    | 30.1                                                    | 14.3                        | 0.0                     | 9.5           | 46.1   |
| 21-CSP-T16A   | 1400                  | 10.2                                                    | 12.0                        | 15.3                    | 15.2          | 47.3   |
| 21-CSP-Q17A   | 94                    | 39.3                                                    | 17.5                        | 0.0                     | 5.9           | 37.3   |
| --            |                       |                                                         |                             |                         |               |        |
| 21-CSP-L19A   | 190                   | 38.9                                                    | 16.8                        | 0.0                     | 7.5           | 36.8   |
| 21-CSP-G20A   | 190                   | 37.8                                                    | 12.5                        | 0.0                     | 6.6           | 43.0   |
| 21-CSP-K21A   | 290                   | 36.1                                                    | 13.1                        | 0.0                     | 9.6           | 41.2   |

<sup>a</sup> Secondary structure contents were calculated using the BeStSel<sup>1</sup> (Beta Structure Selection) method.

**Table S-12.** EC<sub>50</sub> values (SAB249) and estimated secondary structure contents (in 20% TFE) data for 21-CSP D-amino acid scan analogs.

| Compound Name | EC <sub>50</sub> (nM) | Estimated secondary structure contents (%) <sup>a</sup> |                             |                         |               |        |
|---------------|-----------------------|---------------------------------------------------------|-----------------------------|-------------------------|---------------|--------|
|               |                       | $\alpha$ -helix                                         | Antiparallel $\beta$ -sheet | Parallel $\beta$ -sheet | $\beta$ -turn | Others |
| 21-CSP        | 240                   | 27.1                                                    | 16.4                        | 0.0                     | 9.7           | 46.7   |
| 21-CSP-s1     | 140                   | 26.6                                                    | 9.7                         | 0.7                     | 10.9          | 52.1   |
| --            |                       |                                                         |                             |                         |               |        |
| 21-CSP-s3     | 160                   | 30.8                                                    | 27.0                        | 0.0                     | 9.1           | 33.2   |
| 21-CSP-l4     | 390                   | 13.1                                                    | 4.7                         | 14.5                    | 10.8          | 56.9   |
| 21-CSP-s5     | 640                   | 25.7                                                    | 8.7                         | 3.9                     | 10.0          | 51.6   |
| 21-CSP-t6     | 1600                  | 11.0                                                    | 3.8                         | 16.9                    | 17.2          | 51.1   |
| 21-CSP-f7     | --                    | 3.0                                                     | 20.5                        | 14.4                    | 16.4          | 45.8   |
| 21-CSP-f8     | 840                   | 23.2                                                    | 9.3                         | 5.6                     | 14.4          | 47.7   |
| 21-CSP-r9     | 1500                  | 2.4                                                     | 1.4                         | 18.1                    | 15.2          | 62.8   |
| 21-CSP-l10    | 760                   | 0.0                                                     | 65.7                        | 0.0                     | 24.2          | 10.2   |
| 21-CSP-f11    | --                    | 15.3                                                    | 9.8                         | 10.7                    | 15.2          | 49.0   |
| 21-CSP-n12    | --                    | 19.9                                                    | 13.4                        | 8.3                     | 13.5          | 45.0   |
| 21-CSP-r13    | 2100                  | 5.7                                                     | 4.4                         | 14.8                    | 22.2          | 52.9   |
| 21-CSP-s14    | --                    | 15.1                                                    | 7.4                         | 13.5                    | 14.8          | 49.2   |
| 21-CSP-f15    | --                    | 26.1                                                    | 14.3                        | 0.0                     | 12.7          | 46.8   |
| 21-CSP-t16    | --                    | 18.4                                                    | 13.3                        | 7.8                     | 12.7          | 47.8   |
| 21-CSP-q17    | --                    | 30.5                                                    | 10.1                        | 0.0                     | 10.2          | 49.2   |
| 21-CSP-a18    | --                    | 25.8                                                    | 7.1                         | 4.1                     | 10.9          | 52.1   |
| 21-CSP-l19    | --                    | 35.0                                                    | 18.0                        | 0.0                     | 8.5           | 38.4   |
| --            |                       |                                                         |                             |                         |               |        |
| 21-CSP-k21    | 330                   | 43.9                                                    | 19.1                        | 0.0                     | 7.1           | 29.9   |

<sup>a</sup> Secondary structure contents were calculated using the BeStSel<sup>1</sup> (Beta Structure Selection) method.

**Table S-13.** EC<sub>50</sub> values (SAB249) and estimated secondary structure contents (in 20% TFE) data for 18-CSP alanine scan analogs.

| Compound Name | EC <sub>50</sub> (nM) | Estimated secondary structure contents (%) <sup>a</sup> |                             |                         |               |        |
|---------------|-----------------------|---------------------------------------------------------|-----------------------------|-------------------------|---------------|--------|
|               |                       | $\alpha$ -helix                                         | Antiparallel $\beta$ -sheet | Parallel $\beta$ -sheet | $\beta$ -turn | Others |
| 18-CSP        | 6.2                   | 27.1                                                    | 6.8                         | 0.0                     | 9.1           | 57.0   |
| 18-CSP-S1A    | 2.6                   | 21.1                                                    | 16.2                        | 0.0                     | 12.4          | 50.3   |
| 18-CSP-G2A    | 9.7                   | 15.4                                                    | 6.1                         | 13.3                    | 13.5          | 51.7   |
| 18-CSP-S3A    | 13                    | 10.5                                                    | 6.2                         | 16.1                    | 17.6          | 49.6   |
| 18-CSP-L4A    | 57                    | 18.1                                                    | 16.9                        | 4.7                     | 14.7          | 45.6   |
| 18-CSP-S5A    | 11                    | 8.6                                                     | 22.2                        | 11.2                    | 15.5          | 42.5   |
| 18-CSP-T6A    | 6.0                   | 24.2                                                    | 9.7                         | 0.0                     | 11.2          | 54.9   |
| 18-CSP-F7A    | 220                   | 19.2                                                    | 8.3                         | 8.3                     | 12.5          | 51.7   |
| 18-CSP-F8A    | >1,000                | 10.9                                                    | 4.0                         | 14.6                    | 14.3          | 56.2   |
| 18-CSP-R9A    | 27                    | 10.2                                                    | 4.3                         | 13.3                    | 18.0          | 54.1   |
| 18-CSP-L10A   | 6.5                   | 7.0                                                     | 9.6                         | 16.0                    | 18.5          | 48.9   |
| 18-CSP-F11A   | 410                   | 20.7                                                    | 10.7                        | 0.0                     | 11.1          | 57.5   |
| 18-CSP-N12A   | 33                    | 6.3                                                     | 20.1                        | 11.6                    | 16.1          | 45.8   |
| 18-CSP-R13A   | 2.7                   | 3.3                                                     | 53.1                        | 0.0                     | 16.4          | 27.2   |
| 18-CSP-S14A   | 4.5                   | 9.5                                                     | 2.3                         | 14.8                    | 16.2          | 57.1   |
| 18-CSP-F15A   | --                    | 10.9                                                    | 5.9                         | 15.3                    | 16.7          | 51.2   |
| 18-CSP-T16A   | 64                    | 11.7                                                    | 14.0                        | 12.0                    | 15.9          | 46.5   |
| 18-CSP-Q17A   | 19                    | 13.7                                                    | 5.7                         | 13.3                    | 15.8          | 51.4   |

<sup>a</sup> Secondary structure contents were calculated using the BeStSel<sup>1</sup> (Beta Structure Selection) method.



**Table S-14.** EC<sub>50</sub> values (SAB249) and estimated secondary structure contents (in 20% TFE) data for 18-CSP D-amino acid scan analogs.

| Compound Name | EC <sub>50</sub> (nM) | Estimated secondary structure contents (%) <sup>a</sup> |                                |                            |               |        |
|---------------|-----------------------|---------------------------------------------------------|--------------------------------|----------------------------|---------------|--------|
|               |                       | $\alpha$ -helix                                         | Antiparallel<br>$\beta$ -sheet | Parallel<br>$\beta$ -sheet | $\beta$ -turn | Others |
| 18-CSP        | 6.2                   | 27.1                                                    | 6.8                            | 0.0                        | 9.1           | 57.0   |
| 18-CSP-s1     | 6.4                   | 24.2                                                    | 9.1                            | 0.0                        | 9.9           | 56.8   |
| --            |                       |                                                         |                                |                            |               |        |
| 18-CSP-s3     | 9.4                   | 43.6                                                    | 17.3                           | 0.0                        | 7.2           | 31.9   |
| 18-CSP-l4     | 4.5                   | 21.5                                                    | 21.5                           | 0.0                        | 13.3          | 43.7   |
| 18-CSP-s5     | 17                    | 0.0                                                     | 47.5                           | 0.0                        | 25.3          | 27.2   |
| 18-CSP-t6     | 300                   | 8.1                                                     | 0.0                            | 22.2                       | 16.5          | 53.2   |
| 18-CSP-f7     | >1,000                | 1.3                                                     | 28.2                           | 14.7                       | 13.6          | 42.2   |
| 18-CSP-f8     | 42                    | 10.5                                                    | 11.7                           | 13.4                       | 18.4          | 46.1   |
| 18-CSP-r9     | 76                    | 4.2                                                     | 51.7                           | 1.7                        | 14.1          | 28.3   |
| 18-CSP-l10    | 670                   | 9.7                                                     | 9.7                            | 14.0                       | 17.8          | 48.8   |
| 18-CSP-f11    | --                    | 13.3                                                    | 7.0                            | 12.5                       | 17.1          | 50.1   |
| 18-CSP-n12    | --                    | 20.5                                                    | 10.9                           | 5.1                        | 10.6          | 52.9   |
| 18-CSP-r13    | 480                   | 19.7                                                    | 7.7                            | 11.4                       | 12.7          | 48.5   |
| 18-CSP-s14    | >1,000                | 23.4                                                    | 8.4                            | 8.9                        | 12.5          | 46.8   |
| 18-CSP-f15    | --                    | 18.7                                                    | 12.0                           | 5.4                        | 13.3          | 50.5   |
| 18-CSP-t16    | >1,000                | 26.8                                                    | 7.8                            | 5.5                        | 10.0          | 49.9   |
| 18-CSP-q17    | 130                   | 27.5                                                    | 6.9                            | 6.1                        | 9.6           | 50.0   |
| 18-CSP-a18    | >1,000                | 33.4                                                    | 8.7                            | 0.0                        | 8.1           | 49.8   |

<sup>a</sup> Secondary structure contents were calculated using the BeStSel<sup>1</sup> (Beta Structure Selection) method.

**Table S-15.** EC<sub>50</sub> values (SAB249) and estimated secondary structure contents (in 20% TFE) data for 21-CSP and 18-CSP truncated & 2<sup>nd</sup> generation analogs.

| Compound Name             | EC <sub>50</sub> (nM) | Estimated secondary structure contents (%) <sup>a</sup> |                                |                            |               |        |
|---------------------------|-----------------------|---------------------------------------------------------|--------------------------------|----------------------------|---------------|--------|
|                           |                       | $\alpha$ -helix                                         | Antiparallel<br>$\beta$ -sheet | Parallel<br>$\beta$ -sheet | $\beta$ -turn | Others |
| 21-CSP                    | 240                   | 27.1                                                    | 16.4                           | 0.0                        | 9.7           | 46.7   |
| 21-CSP-des-S1             | 23                    | 40.3                                                    | 19.9                           | 0.0                        | 5.9           | 33.8   |
| 21-CSP-des-S1G2           | 120                   | 32.6                                                    | 9.8                            | 0.0                        | 7.6           | 50.1   |
| 21-CSP-des-S1G2S3         | 530                   | 23.7                                                    | 9.5                            | 3.9                        | 11.5          | 51.4   |
| 21-CSP-des-S1G2S3L4       | 3600                  | 16.1                                                    | 13.5                           | 9.1                        | 14.6          | 46.8   |
| 21-CSP-des-S1G2S3L4S5     | 3300                  | 10.4                                                    | 5.0                            | 16.3                       | 18.5          | 49.8   |
| 21-CSP-des-K21            | 98                    | 42.0                                                    | 16.6                           | 0.0                        | 8.4           | 33.1   |
| 21-CSP-des-G20K21         | 3600                  | 16.7                                                    | 5.2                            | 11.3                       | 11.8          | 55.0   |
| 18-CSP-des-S1             | 4.8                   | 29.6                                                    | 12.6                           | 0.0                        | 7.5           | 50.2   |
| 18-CSP-des-S1G2           | 7.9                   | 15.1                                                    | 5.6                            | 11.3                       | 15.3          | 52.6   |
| 18-CSP-des-S1G2S3         | 85                    | 21.5                                                    | 15.0                           | 0.8                        | 13.0          | 49.7   |
| 18-CSP-des-S1G2S3L4       | 570                   | 9.3                                                     | 2.5                            | 14.5                       | 17.9          | 55.8   |
| 18-CSP-des-S1G2S3L4S5     | 950                   | 17.9                                                    | 14.8                           | 10.1                       | 14.5          | 42.6   |
| 18-CSP-des-A18            | --                    | 14.2                                                    | 7.8                            | 14.7                       | 13.7          | 49.6   |
| 18-CSP-des-Q17A18         | --                    | 23.7                                                    | 4.8                            | 11.8                       | 9.7           | 50.0   |
| 18-CSP-s1s3l4             | 17                    | 27.2                                                    | 22.2                           | 0.0                        | 9.9           | 40.7   |
| 18-CSP-s1s3l4L10AR13AS14A | 3.4                   | 3.4                                                     | 36.8                           | 11.7                       | 15.2          | 32.9   |
| 18-CSP-S1AL10AR13AS14A    | 1.7                   | 13.2                                                    | 12.5                           | 10.3                       | 15.6          | 48.4   |
| 18-CSP-S3T                | 2.1                   | 38.8                                                    | 25.7                           | 0.0                        | 7.0           | 28.6   |
| 21-CSP-S3T                | 94                    | 30.1                                                    | 10.2                           | 0.0                        | 11.4          | 48.3   |

<sup>a</sup> Secondary structure contents were calculated using the BeStSel<sup>1</sup> (Beta Structure Selection) method.

## **References**

- [1] Micsonai, A., Wien, F., Kernya, L., Lee, Y. H., Goto, Y., Réfrégiers, M., and Kardos, J. (2015) Accurate secondary structure prediction and fold recognition for circular dichroism spectroscopy, *Proc. Natl. Acad. Sci. U. S. A.* *112*, E3095-3103 DOI 10.1073/pnas.1500851112.
